# Supplementary material for: Synthesis of tetrahydroxy perhydroaza-azulenes: tandem Johnson–Claisen rearrangement ofd-glucose-derived allylic alcohols
Source: Royal Society of Chemistry journal article supplement (doi:10.1039/b603545k), 2006-01-01
Supplement: b603545k.pdf [file b603545k.pdf]

## Supporting Information

### Synthesis of Tetrahydroxy Perhydroaza-azulenes: Tandem Johnson-Claisen

#### Rearrangement of D-Glucose Derived Allylic Alcohols

Shankar D. Markad,<sup>a</sup> Narayan S. Karanjule,<sup>a</sup> Tarun Sharma,<sup>b</sup> Sushma G. Sabharwal,<sup>b</sup> Vedavati G.

Puranik<sup>c</sup> and Dilip D. Dhavale<sup>\*a</sup>

<sup>a</sup>Garware Research Centre, Department of Chemistry, University of Pune, Pune – 411 007, INDIA

<sup>b</sup>Division of Biochemistry, Department of Chemistry, University of Pune, Pune – 411 007, INDIA

<sup>c</sup>Centre for Material Characterization, National Chemical Laboratory, Pune-411 008, INDIA

*ddd@chem.unipune.ernet.in*

|                                                     | Page(s) |
|-----------------------------------------------------|---------|
| <sup>1</sup> H NMR spectrum of compound <b>6</b>    | S1      |
| <sup>13</sup> C NMR spectrum of compound <b>6</b>   | S2      |
| <sup>1</sup> H NMR spectrum of compound <b>7</b>    | S3      |
| <sup>13</sup> C NMR spectrum of compound <b>7</b>   | S4      |
| <sup>1</sup> H NMR spectrum of compound <b>8</b>    | S5      |
| <sup>13</sup> C NMR spectrum of compound <b>8</b>   | S6      |
| <sup>1</sup> H NMR spectrum of compound <b>9</b>    | S7      |
| <sup>13</sup> C NMR spectrum of compound <b>9</b>   | S8      |
| <sup>1</sup> H NMR spectrum of compound <b>10a</b>  | S9      |
| <sup>13</sup> C NMR spectrum of compound <b>10a</b> | S10     |
| <sup>1</sup> H NMR spectrum of compound <b>10b</b>  | S11     |
| <sup>13</sup> C NMR spectrum of compound <b>10b</b> | S12     |
| <sup>1</sup> H NMR spectrum of compound <b>11a</b>  | S13     |
| <sup>13</sup> C NMR spectrum of compound <b>11a</b> | S14     |

|                                                     |         |
|-----------------------------------------------------|---------|
| <sup>1</sup> H NMR spectrum of compound <b>11b</b>  | S15     |
| <sup>13</sup> C NMR spectrum of compound <b>11b</b> | S16     |
| <sup>1</sup> H NMR spectrum of compound <b>12a</b>  | S17     |
| <sup>13</sup> C NMR spectrum of compound <b>12a</b> | S18     |
| <sup>1</sup> H NMR spectrum of compound <b>12b</b>  | S19     |
| <sup>13</sup> C NMR spectrum of compound <b>12b</b> | S20     |
| <sup>1</sup> H NMR spectrum of compound <b>13a</b>  | S21     |
| <sup>13</sup> C NMR spectrum of compound <b>13a</b> | S22     |
| <sup>1</sup> H NMR spectrum of compound <b>13b</b>  | S23     |
| <sup>13</sup> C NMR spectrum of compound <b>13b</b> | S24     |
| <sup>1</sup> H NMR spectrum of compound <b>1a</b>   | S25     |
| <sup>13</sup> C NMR spectrum of compound <b>1a</b>  | S26     |
| <sup>1</sup> H NMR spectrum of compound <b>1b</b>   | S27     |
| <sup>13</sup> C NMR spectrum of compound <b>1b</b>  | S28     |
| <sup>1</sup> H NMR spectrum of compound <b>1e</b>   | S29     |
| <sup>13</sup> C NMR spectrum of compound <b>1e</b>  | S30     |
| <sup>1</sup> H NMR spectrum of compound <b>1f</b>   | S31     |
| <sup>13</sup> C NMR spectrum of compound <b>1f</b>  | S32     |
| X-ray crystallographic data of compound <b>12a</b>  | S33-S39 |

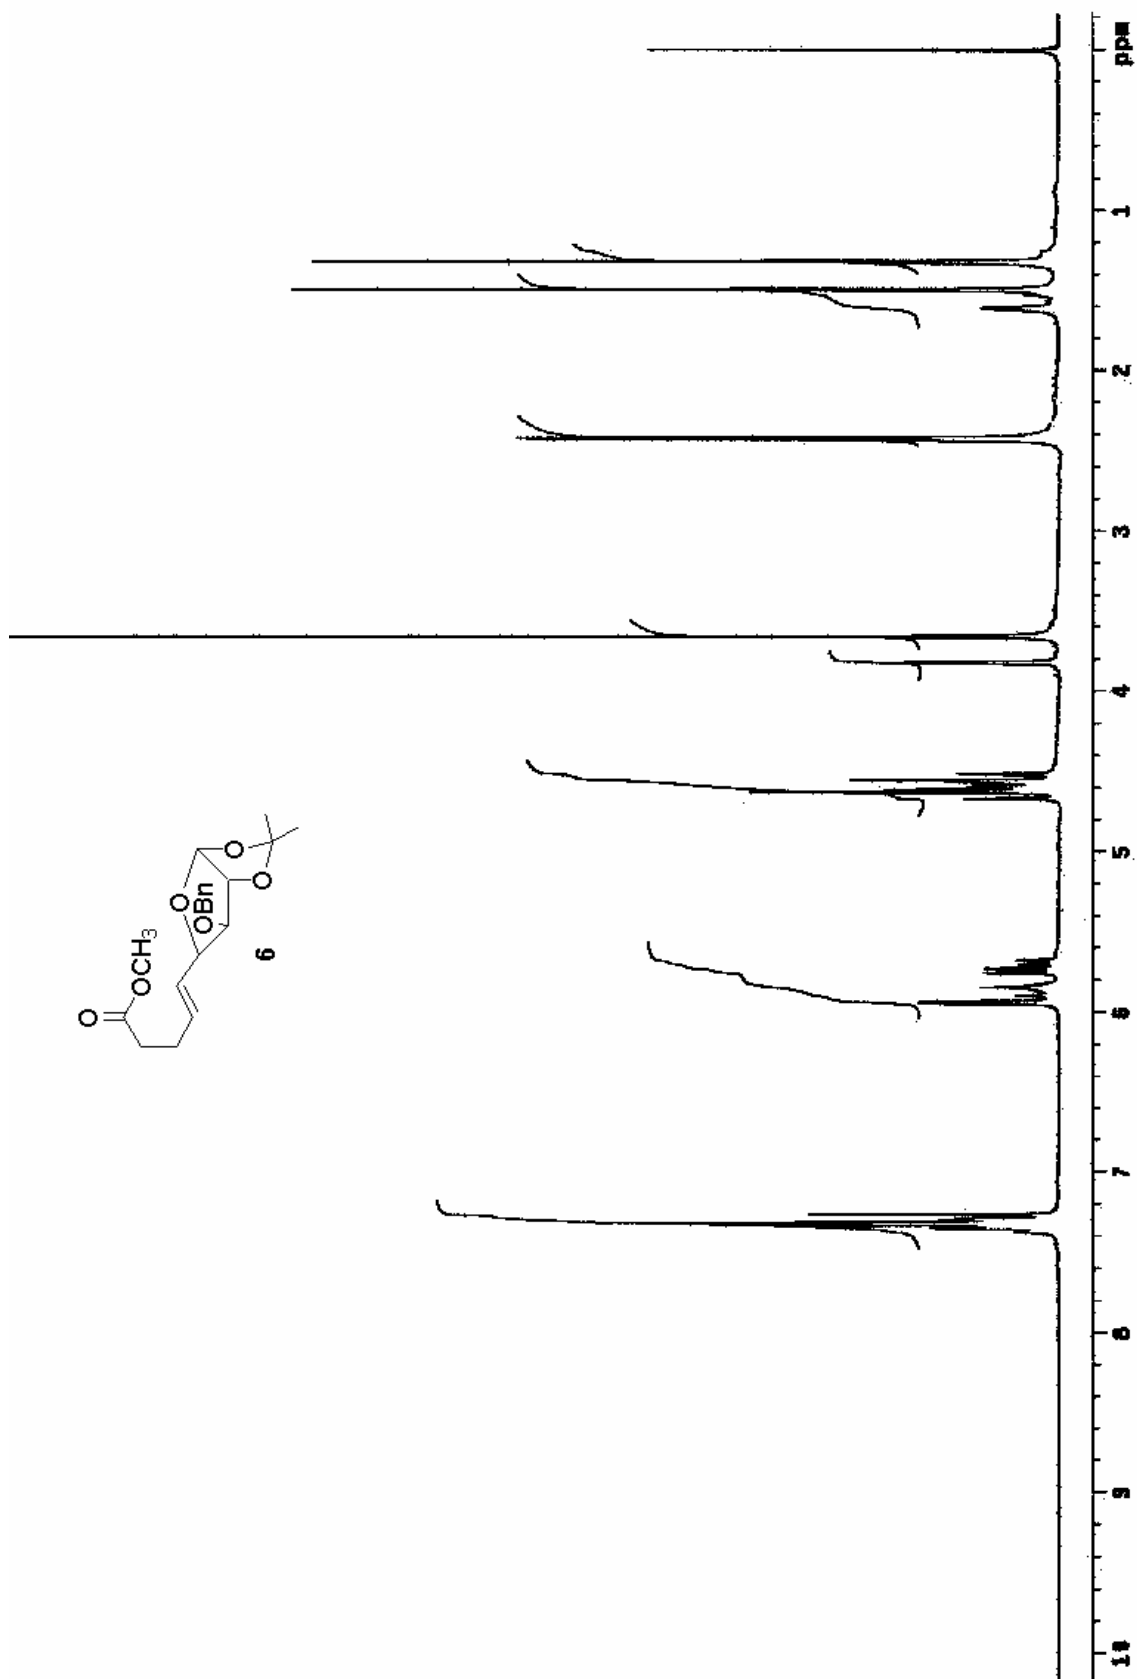

Figure 1: <sup>1</sup>H NMR (300 MHz, CDCl<sub>3</sub>) spectrum of compound 6

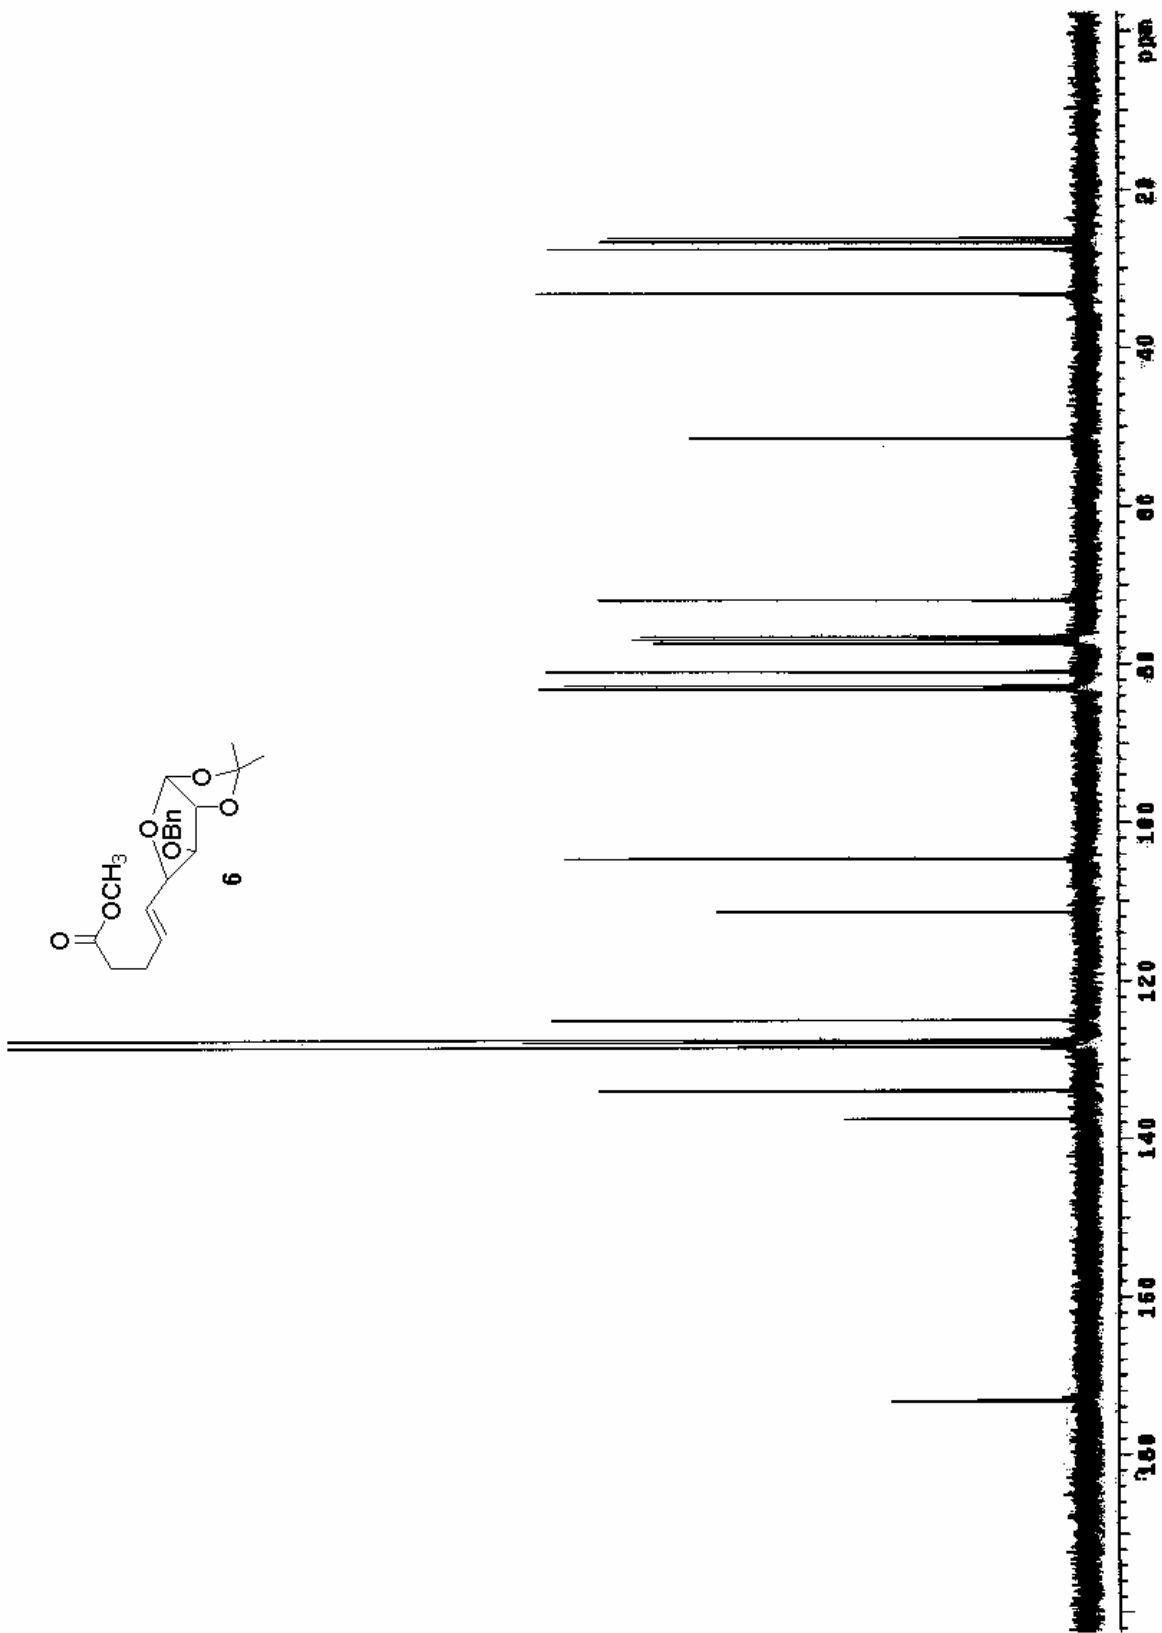

Figure 2: <sup>13</sup>C NMR (75 MHz, CDCl<sub>3</sub>) spectrum of compound 6

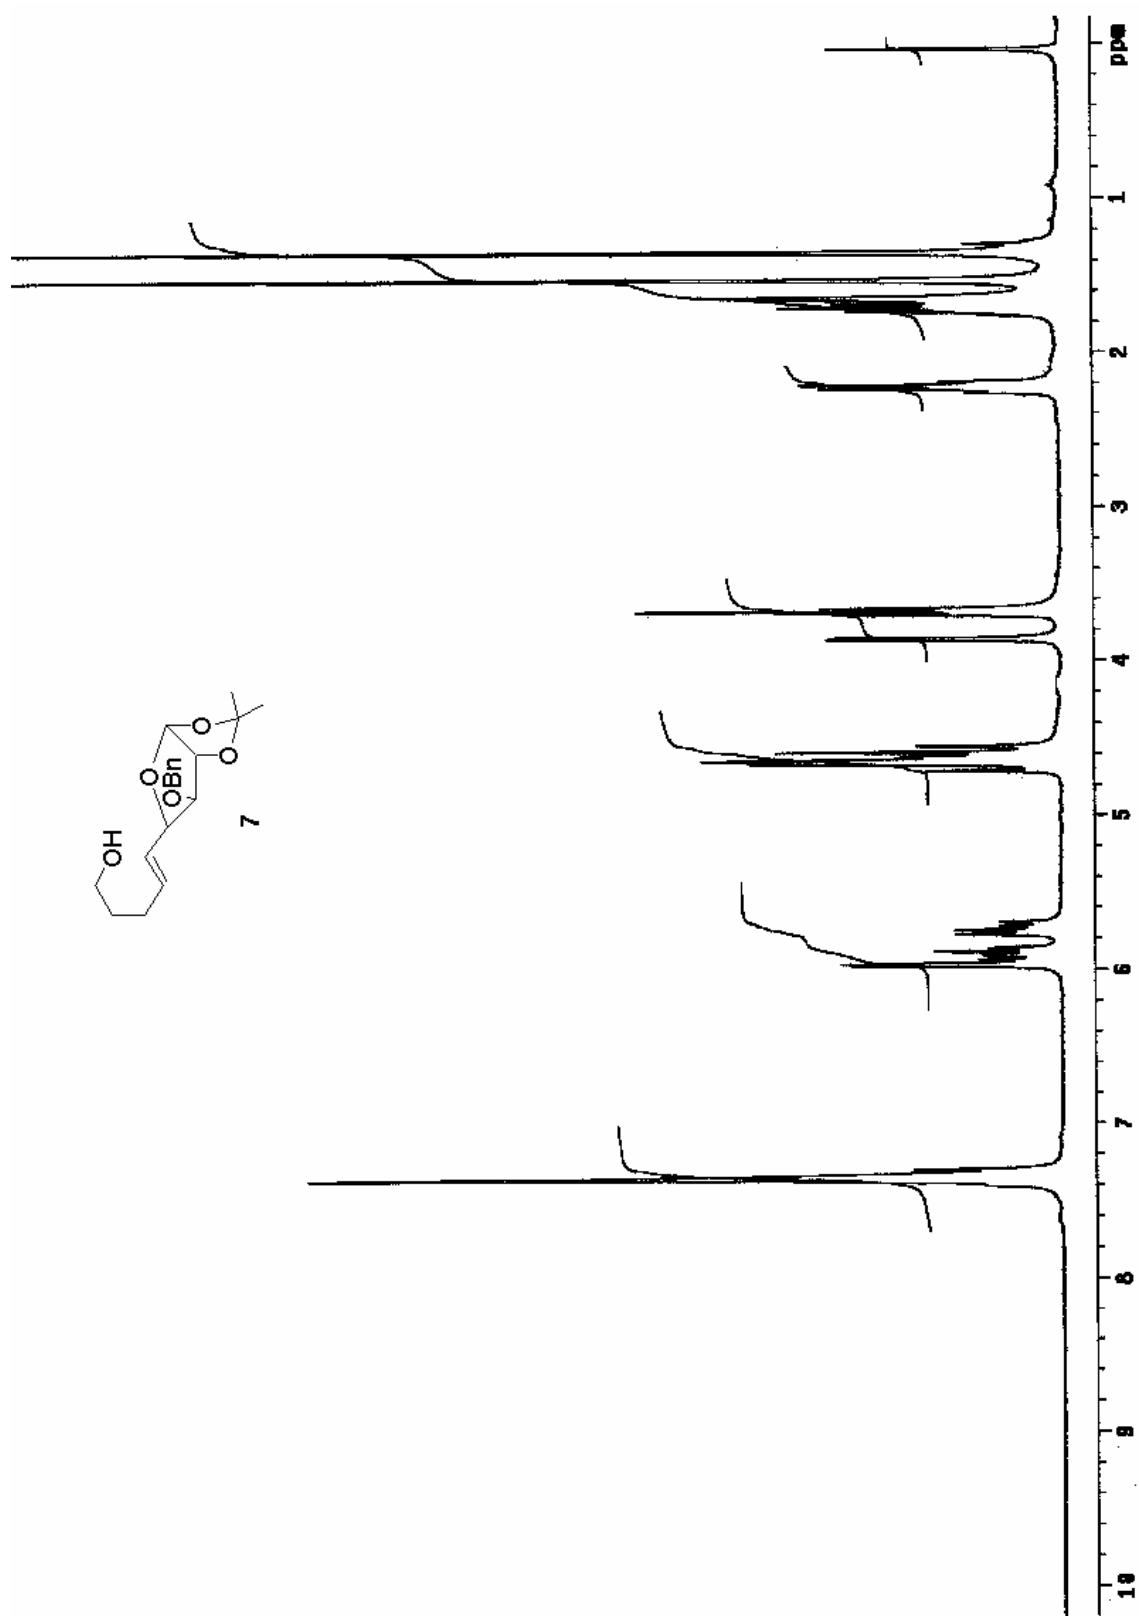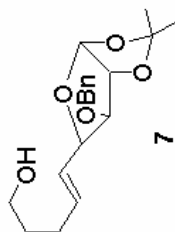

Figure 3: <sup>1</sup>H NMR (300 MHz, CDCl<sub>3</sub>) spectrum of compound 7

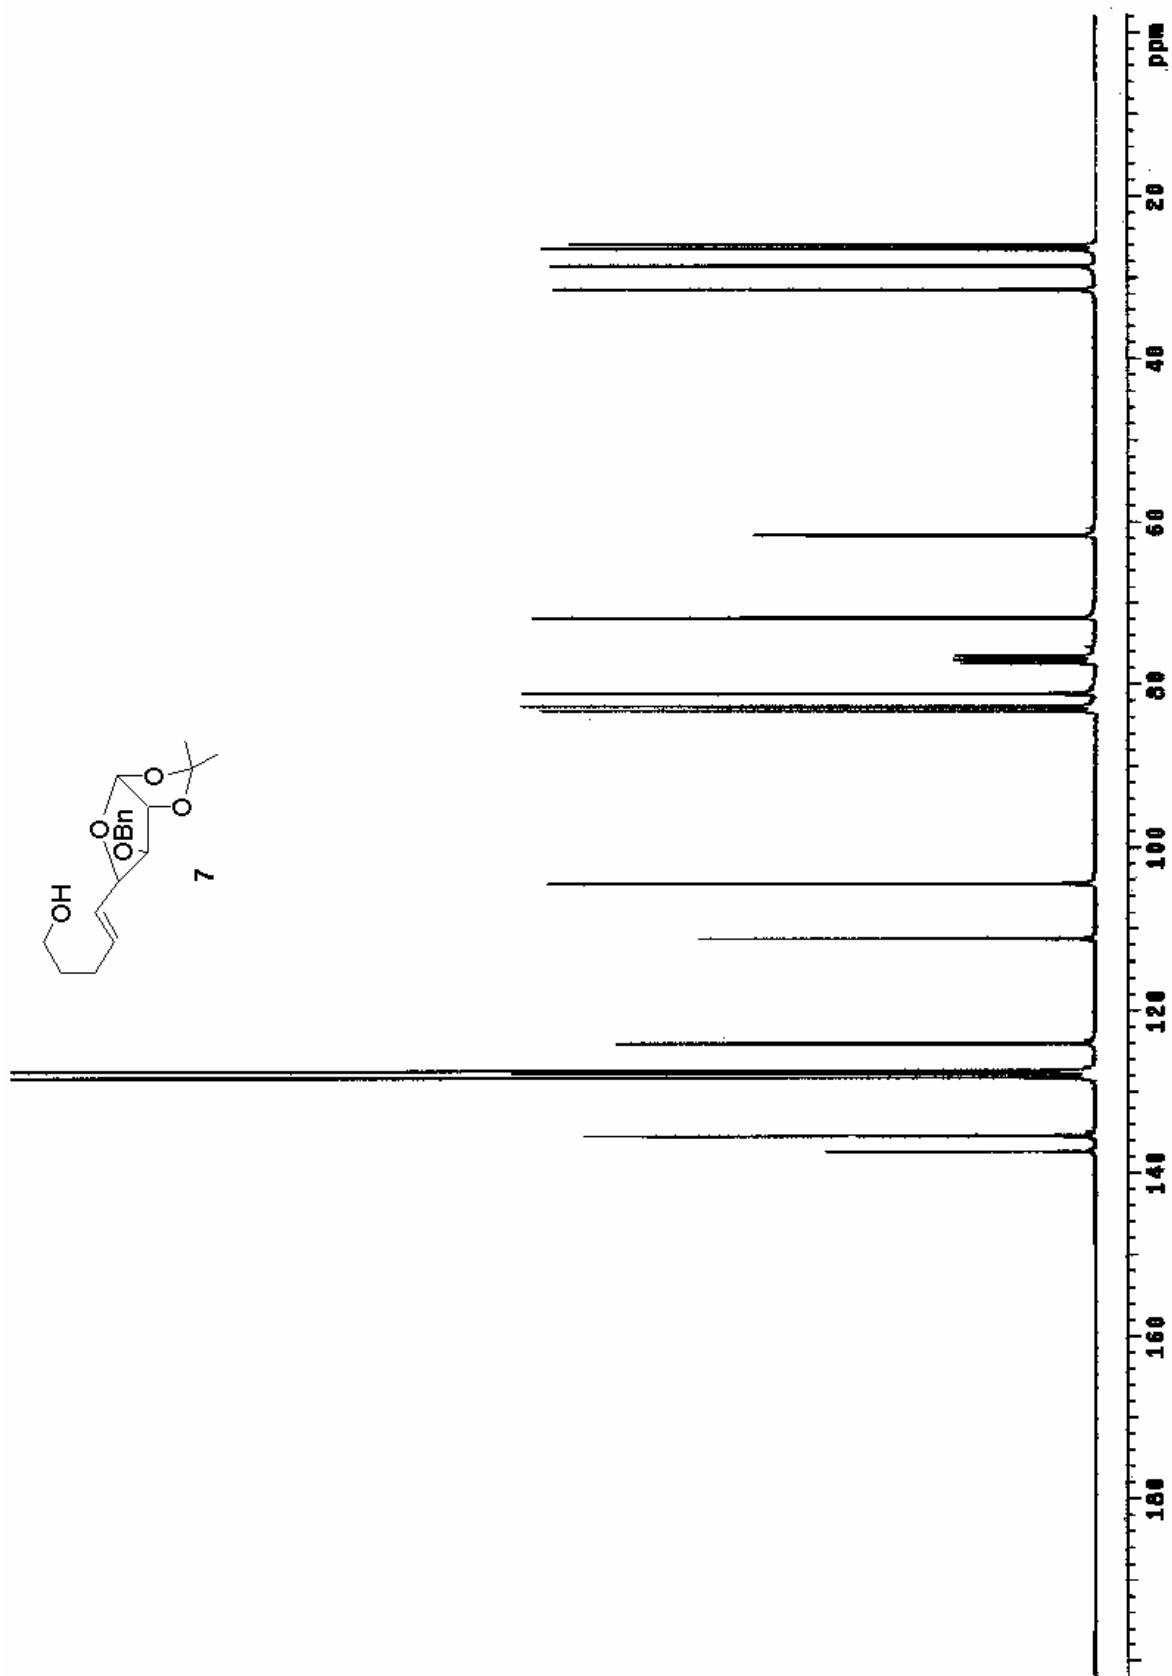

Figure 4: <sup>13</sup>C NMR (75 MHz, CDCl<sub>3</sub>) spectrum of compound 7

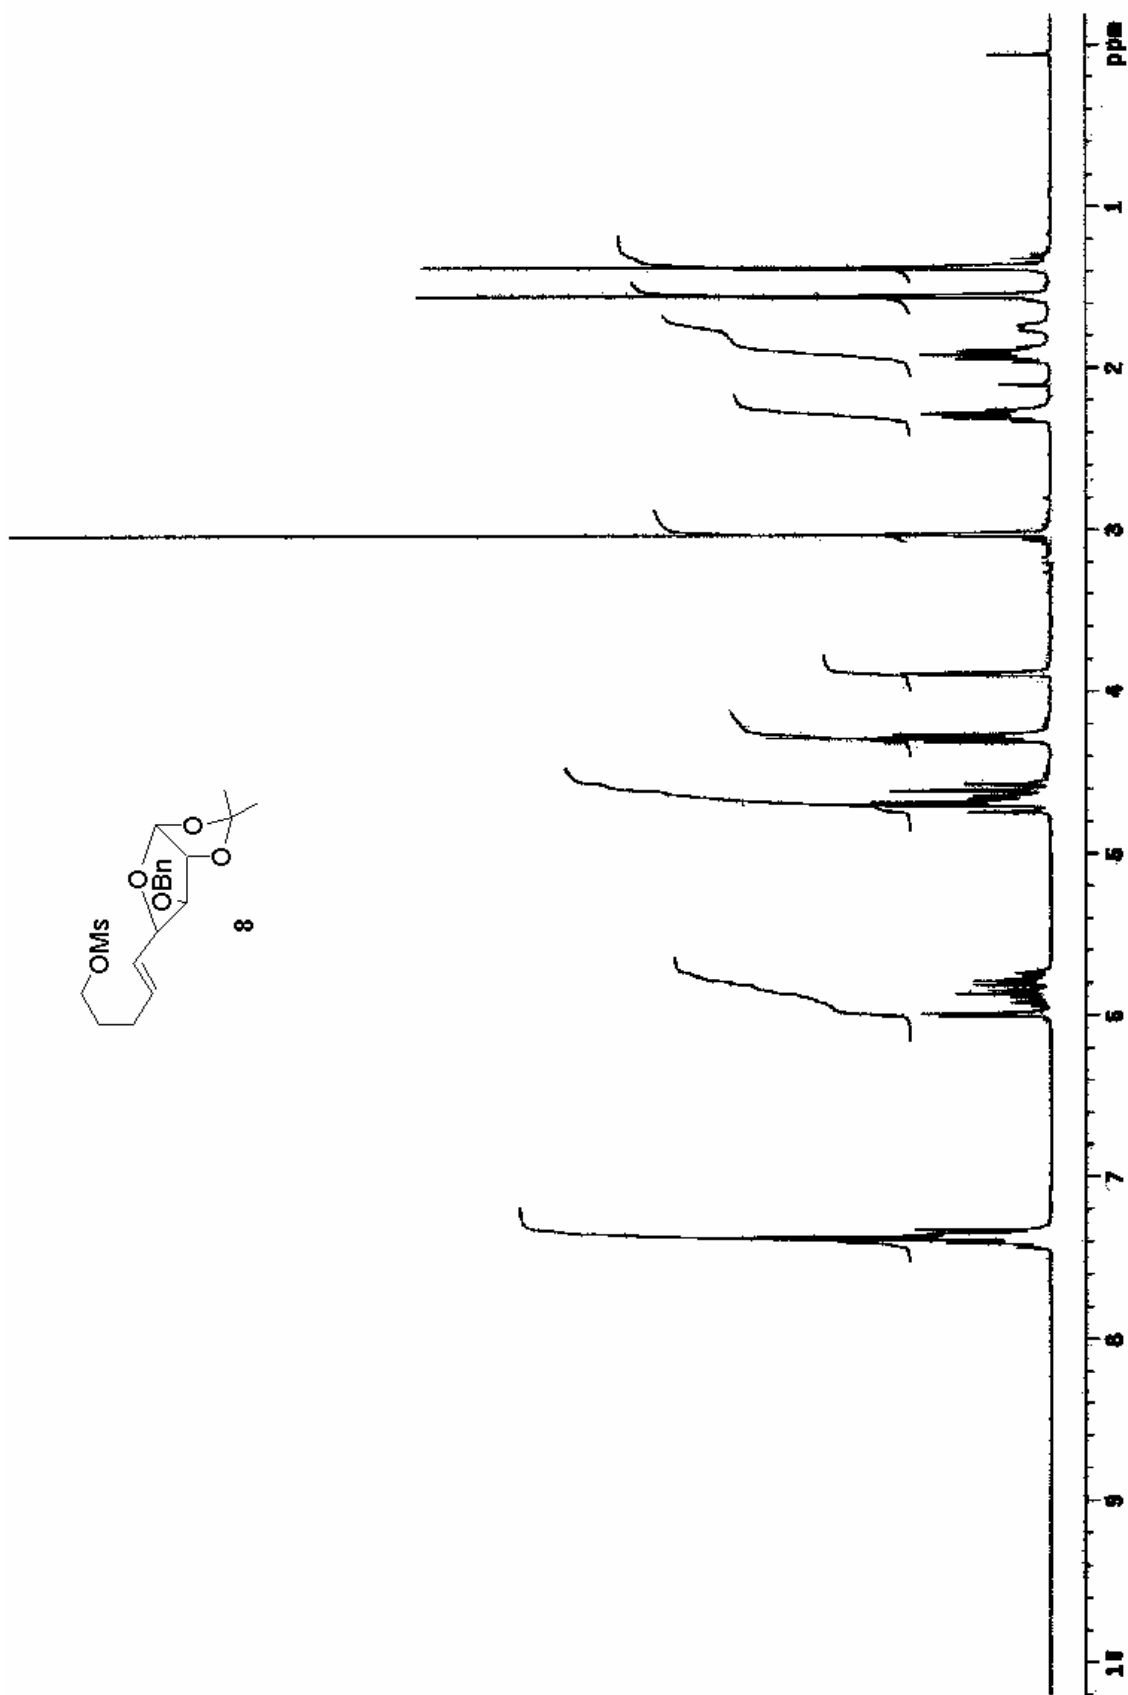

Figure 5: <sup>1</sup>H NMR (300 MHz, CDCl<sub>3</sub>) spectrum of compound 8

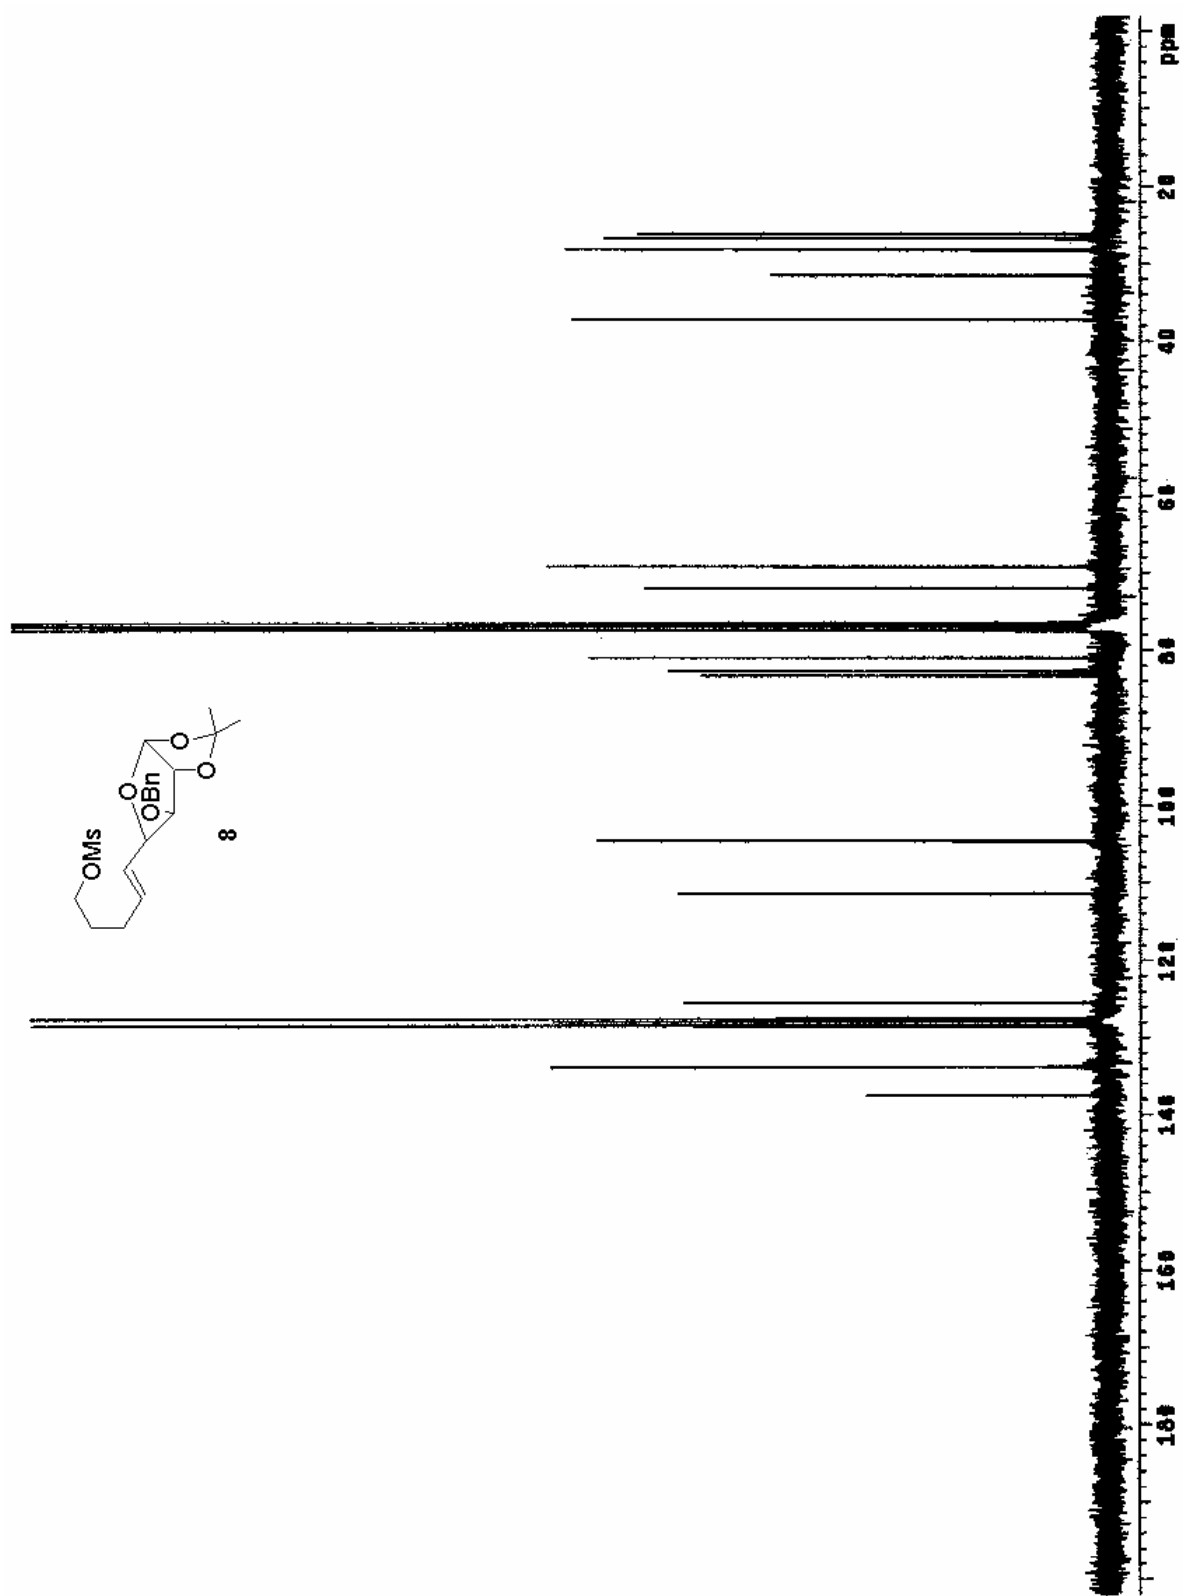

Figure 6: <sup>13</sup>C NMR (75 MHz, CDCl<sub>3</sub>) spectrum of compound 8



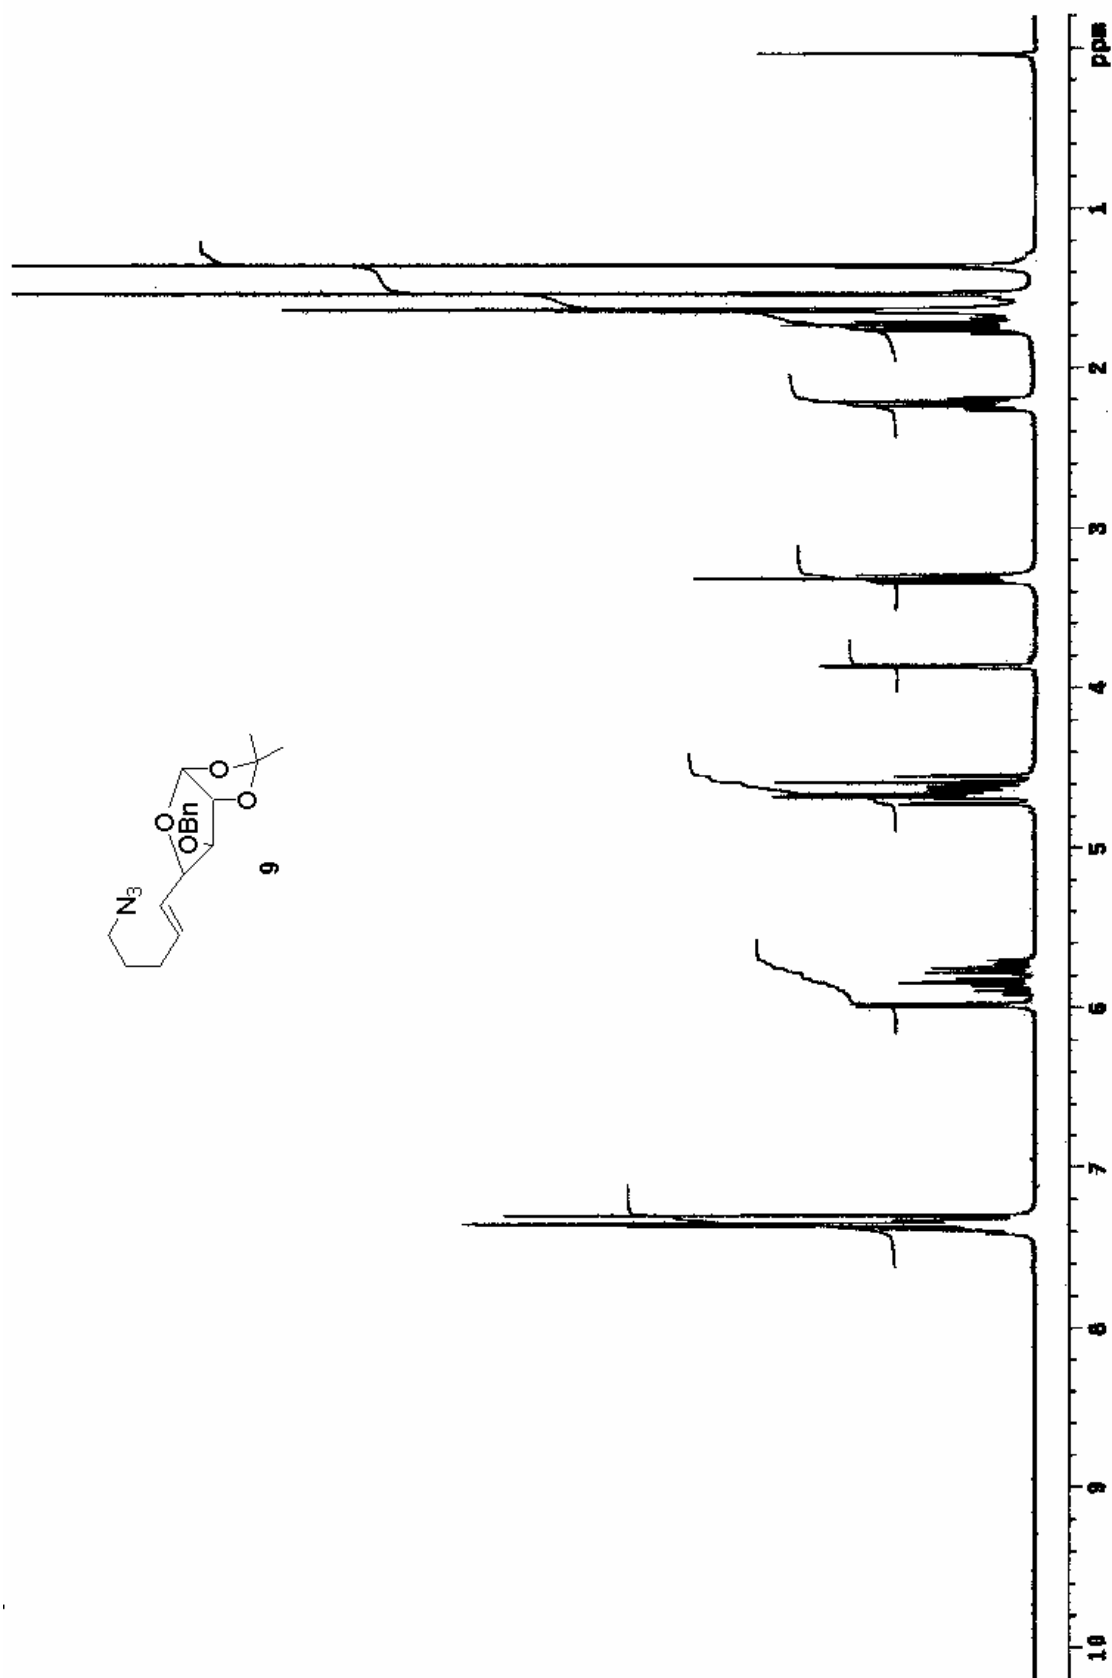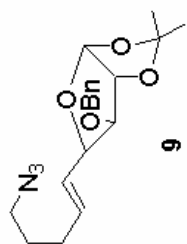

Figure 7: <sup>1</sup>H NMR (300 MHz, CDCl<sub>3</sub>) spectrum of compound 9

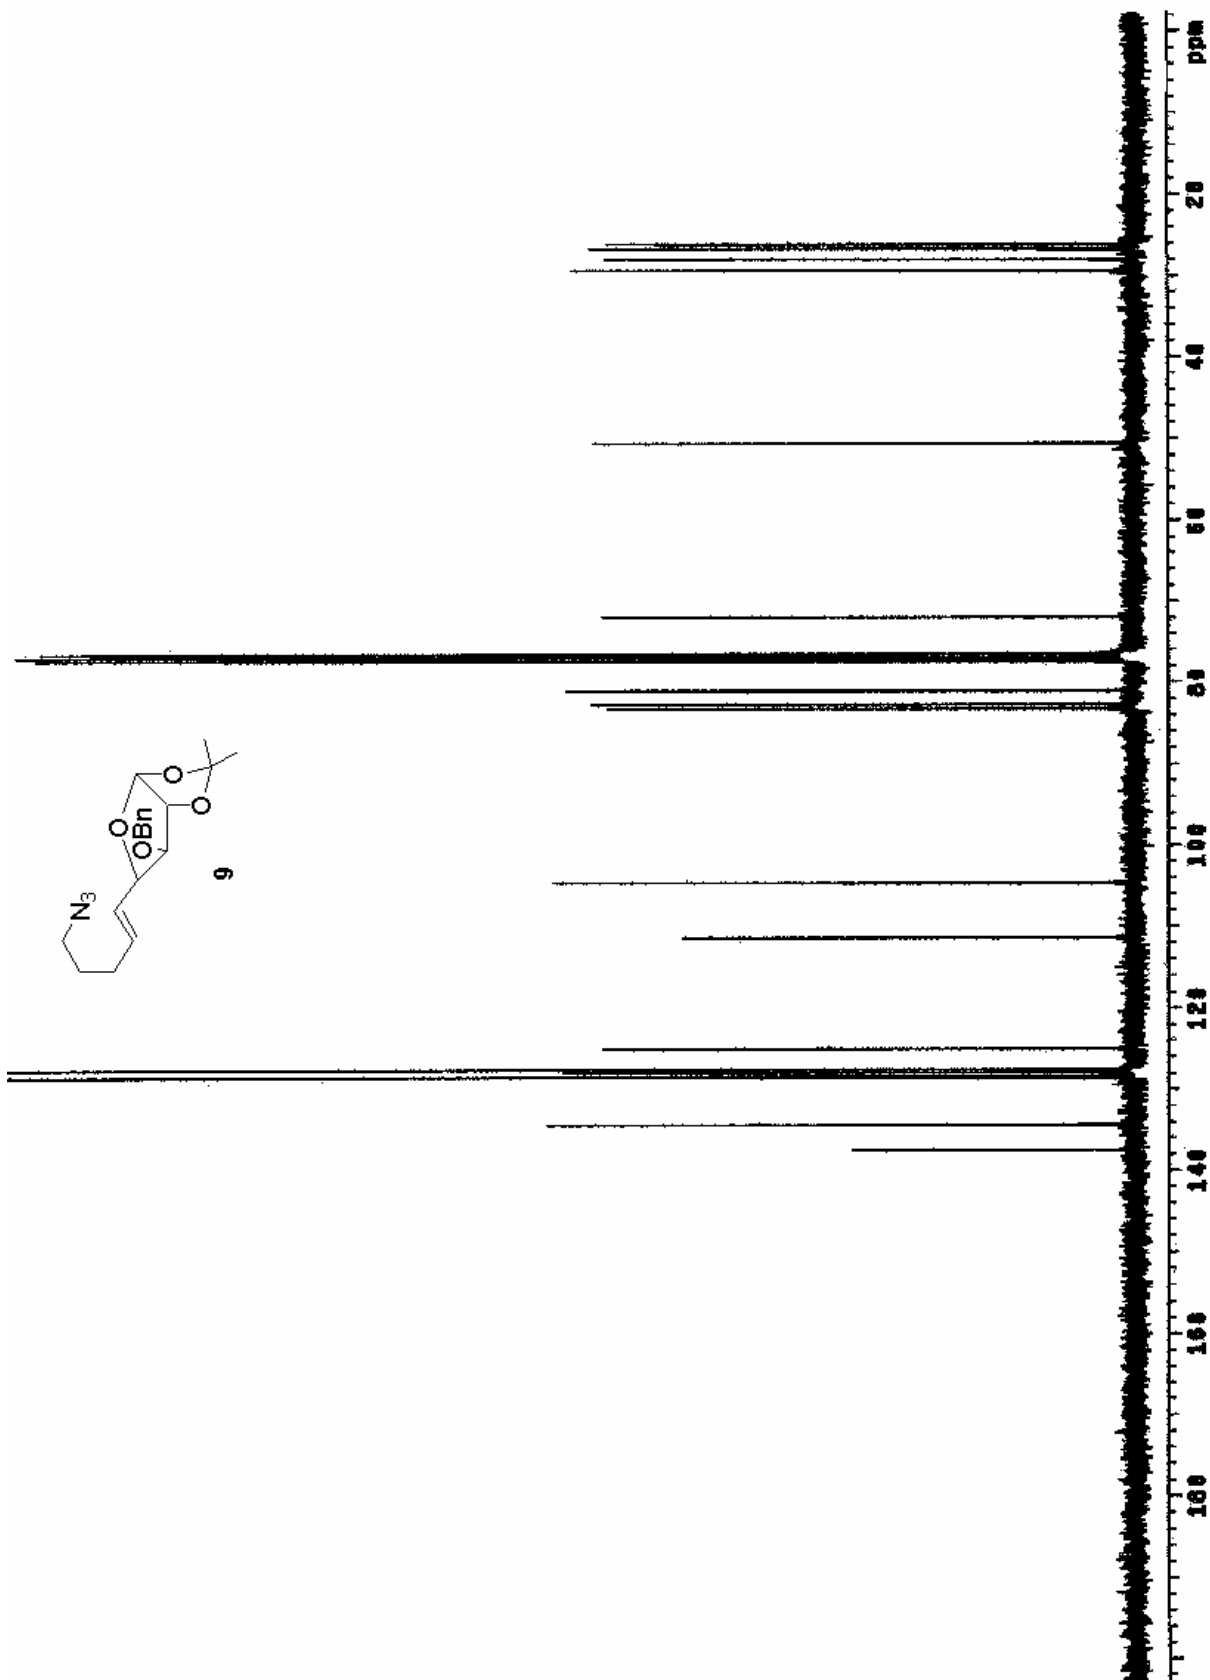

Figure 8:  $^{13}\text{C}$  NMR (75 MHz,  $\text{CDCl}_3$ ) spectrum of compound 9

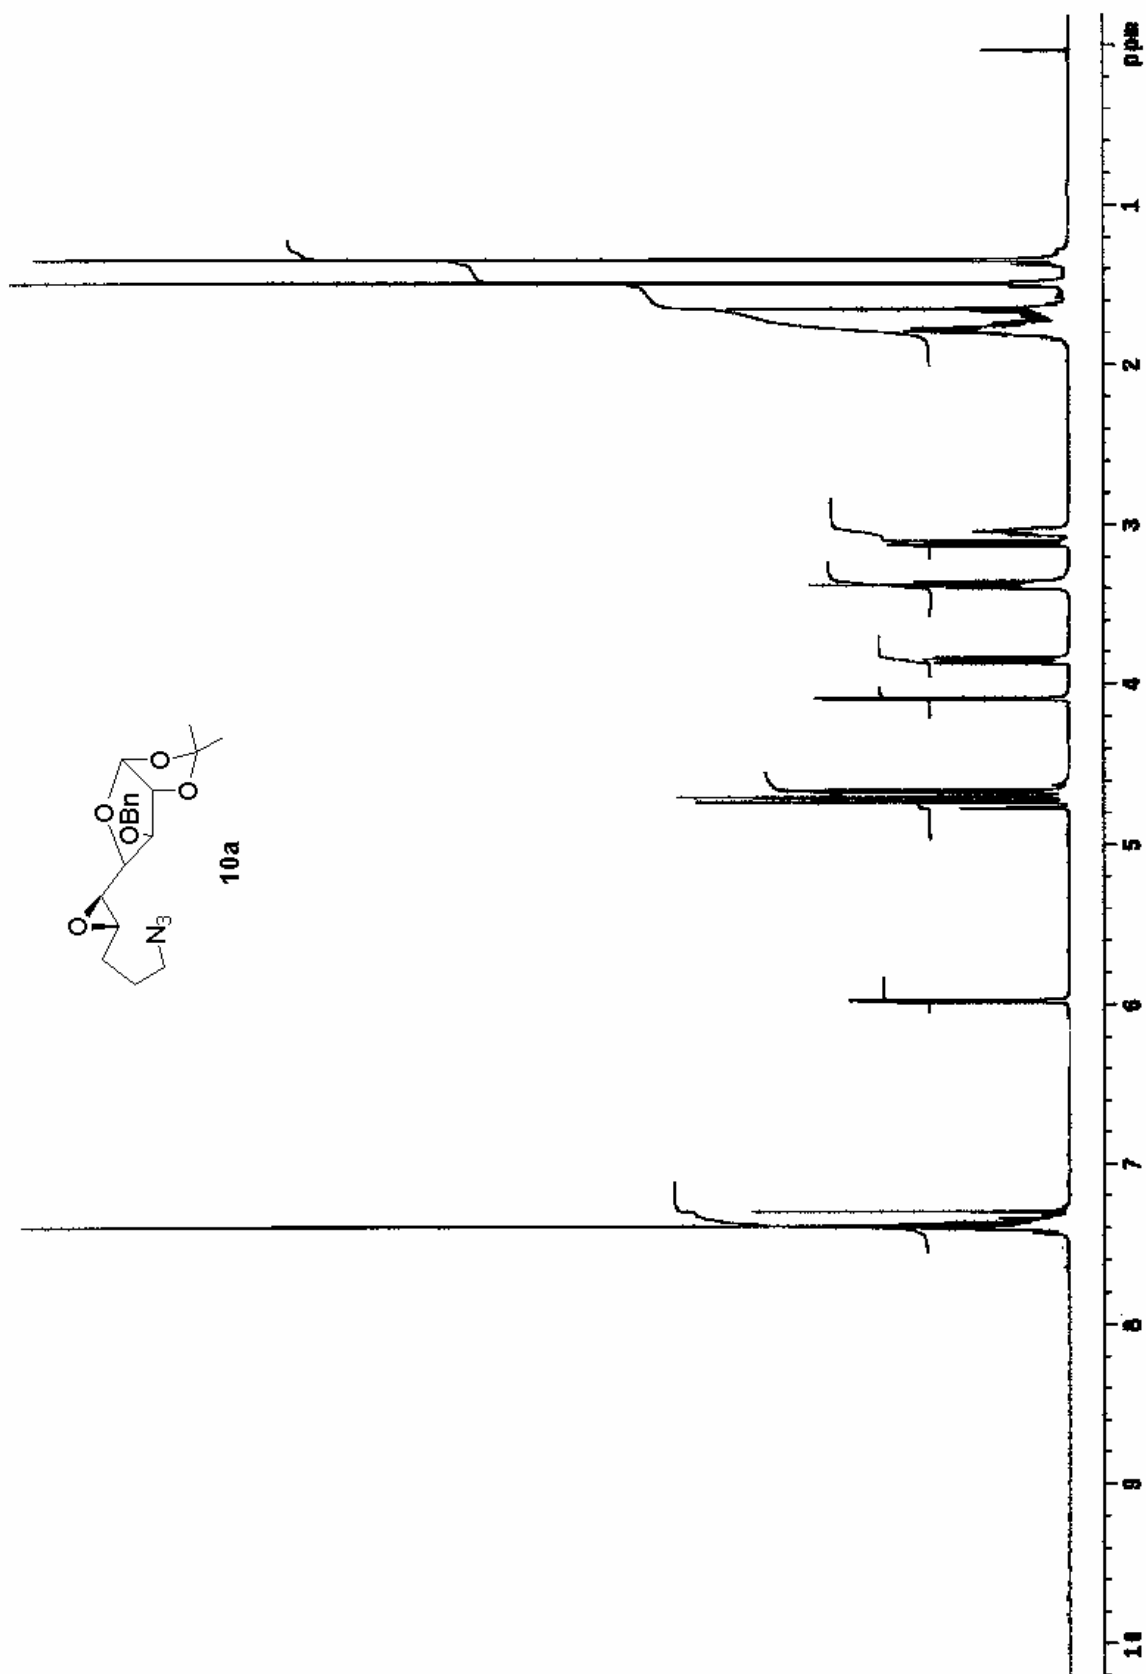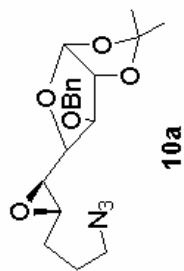

Figure 9: <sup>1</sup>H NMR (300 MHz, CDCl<sub>3</sub>) spectrum of compound 10a

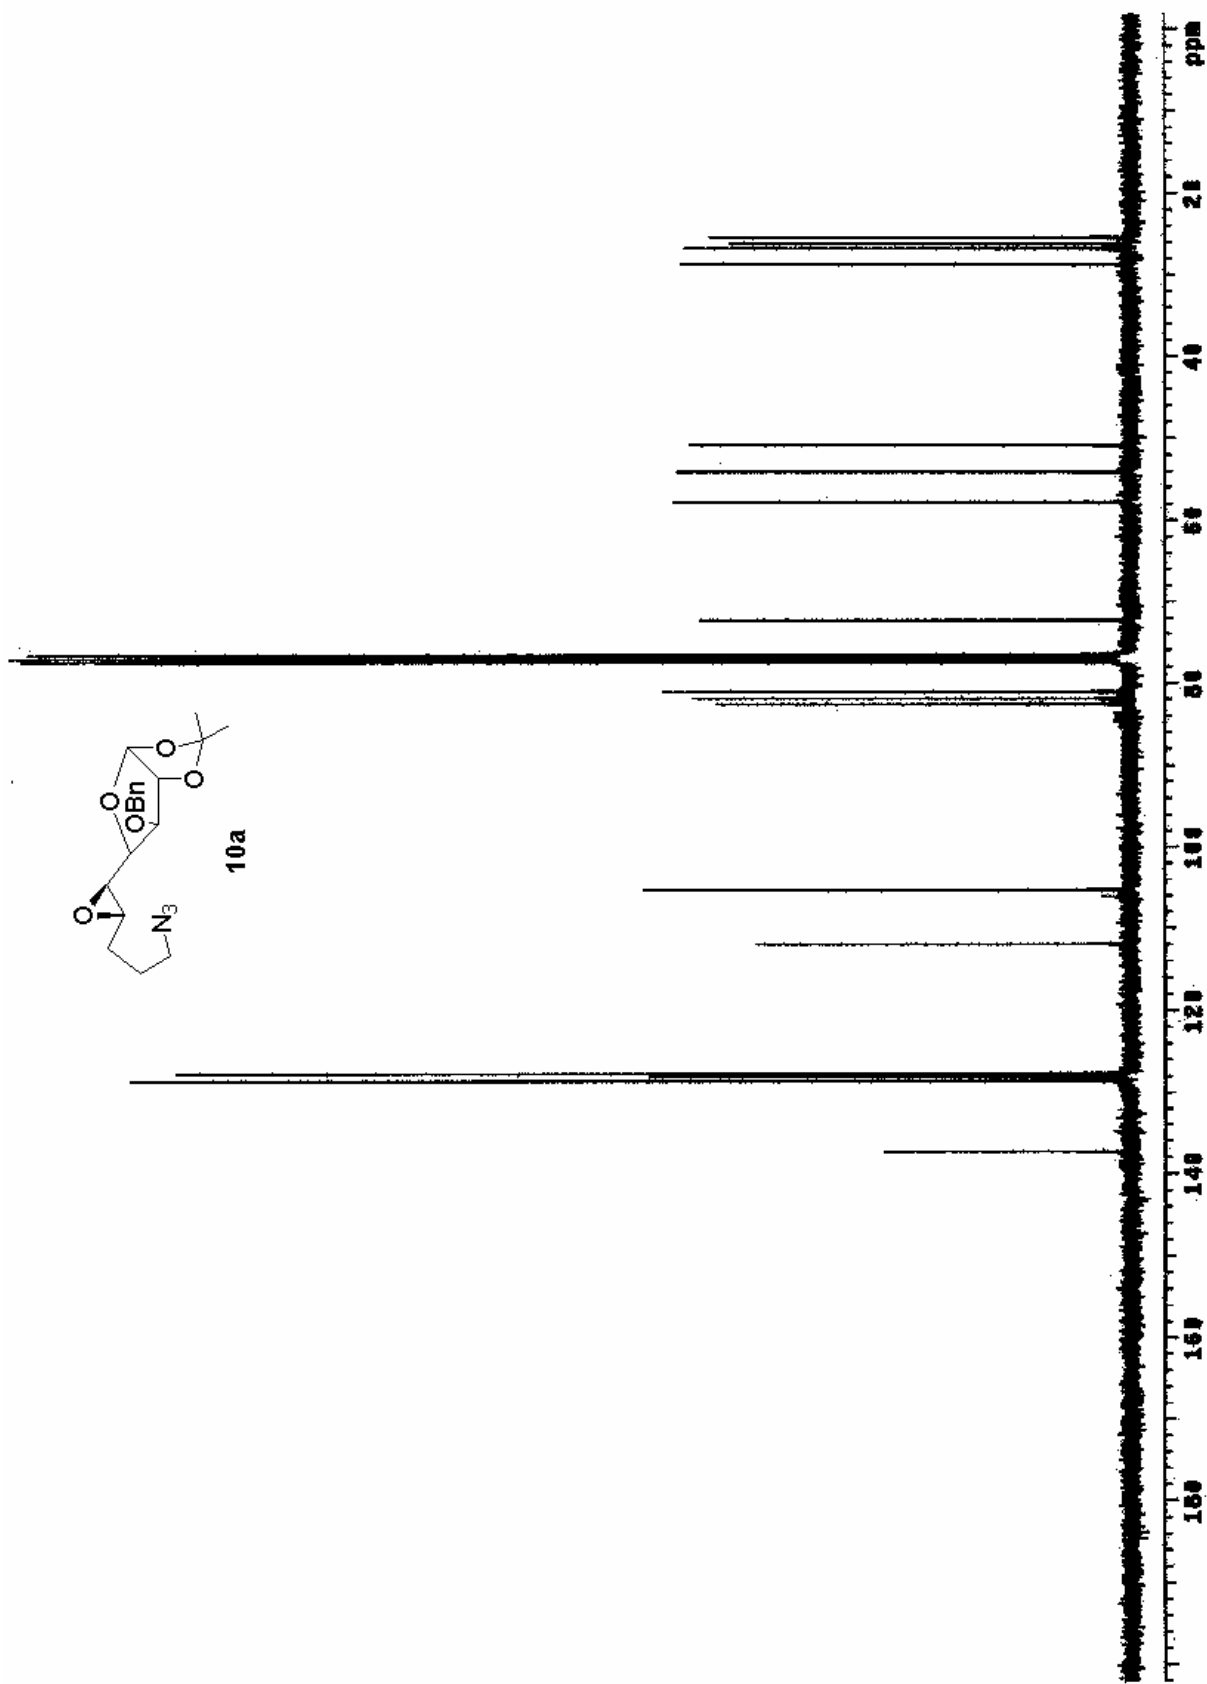

Figure 10:  $^{13}\text{C}$  NMR (75 MHz,  $\text{CDCl}_3$ ) spectrum of compound 10a

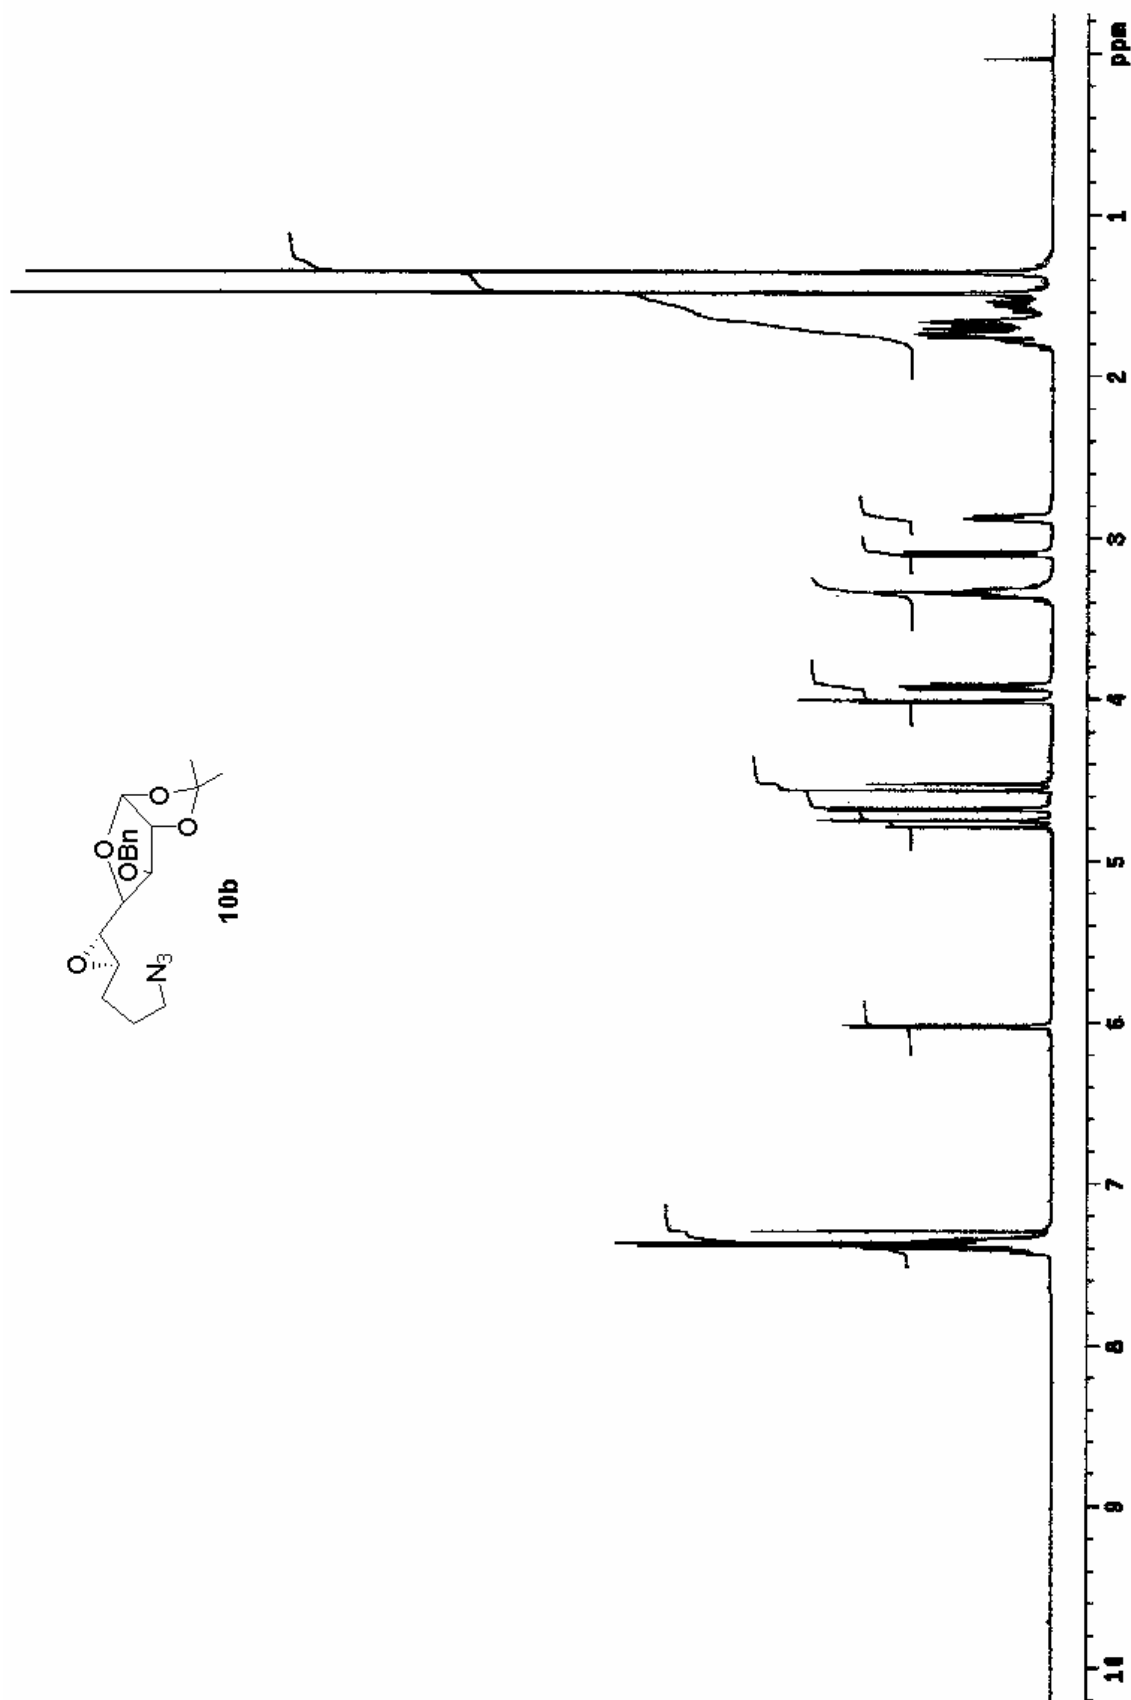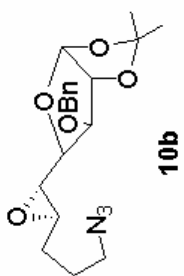

Figure 11: <sup>1</sup>H NMR (300 MHz, CDCl<sub>3</sub>) spectrum of compound 10b

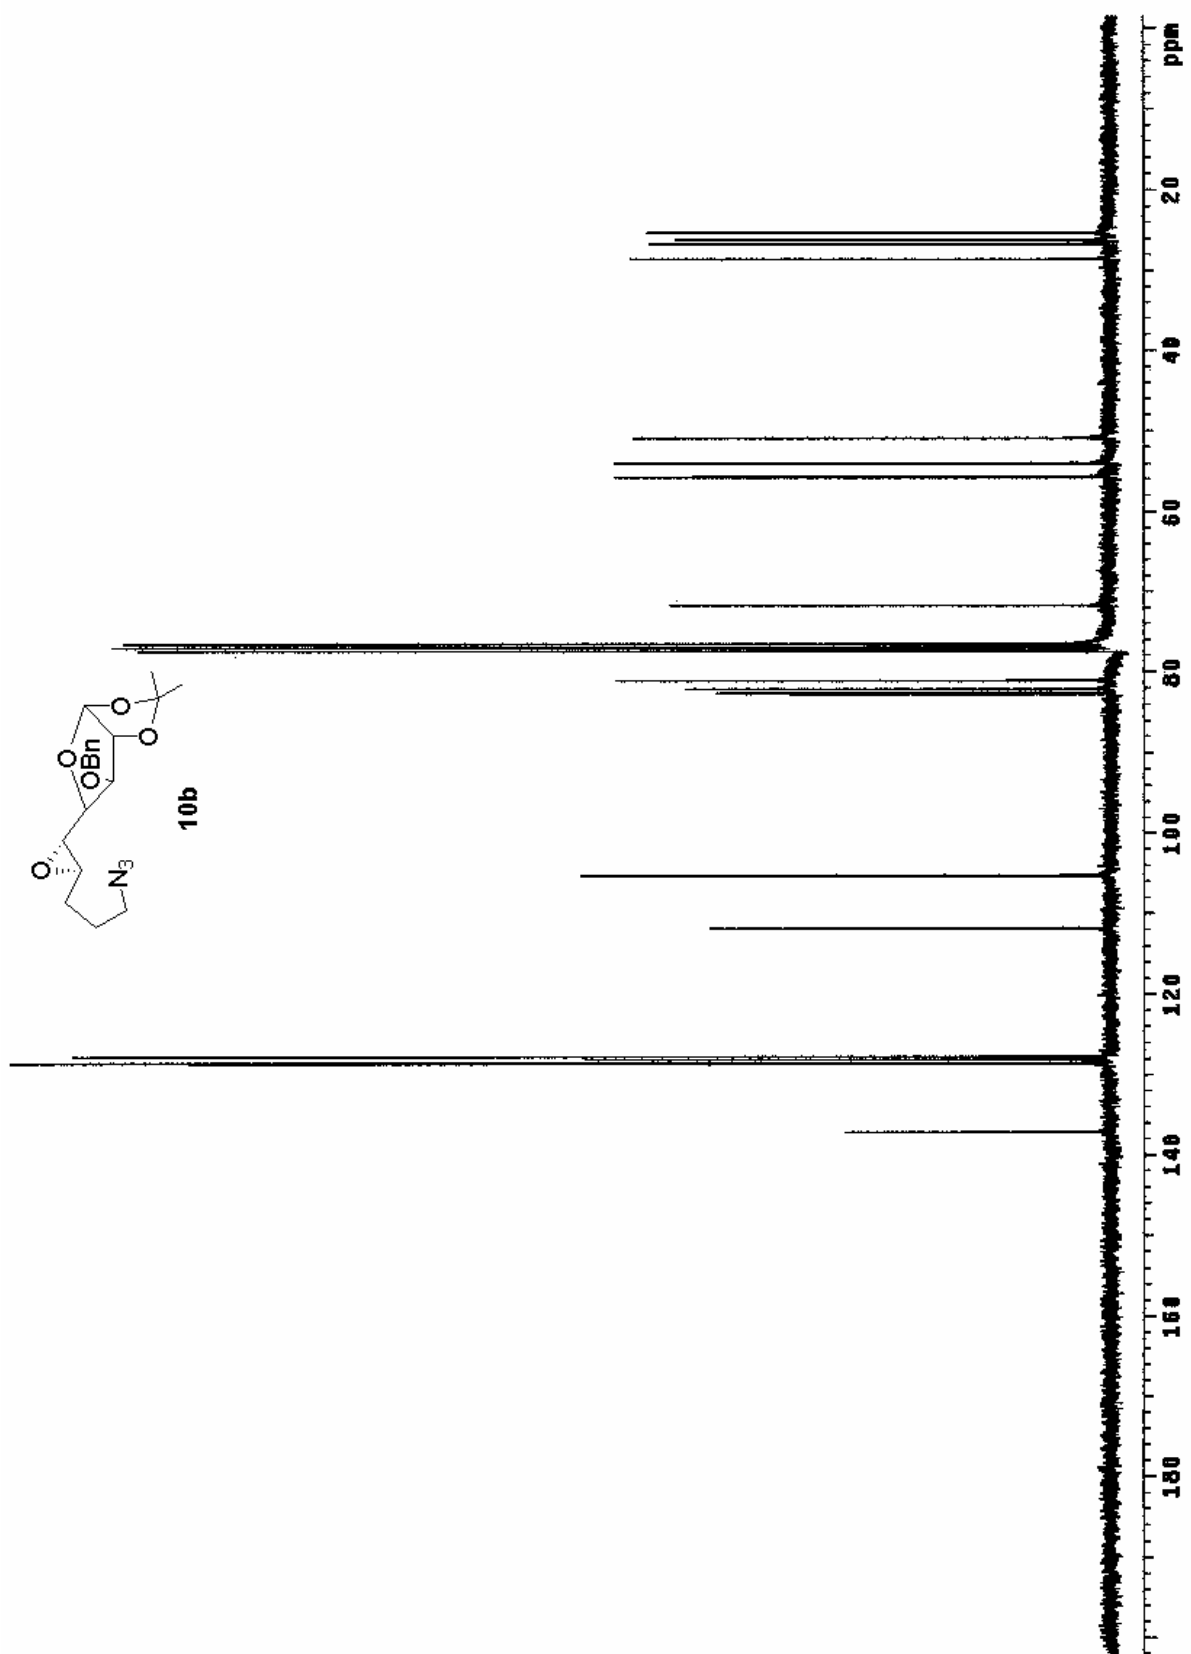

Figure 12:  $^{13}\text{C}$  NMR (75 MHz,  $\text{CDCl}_3$ ) spectrum of compound 10b

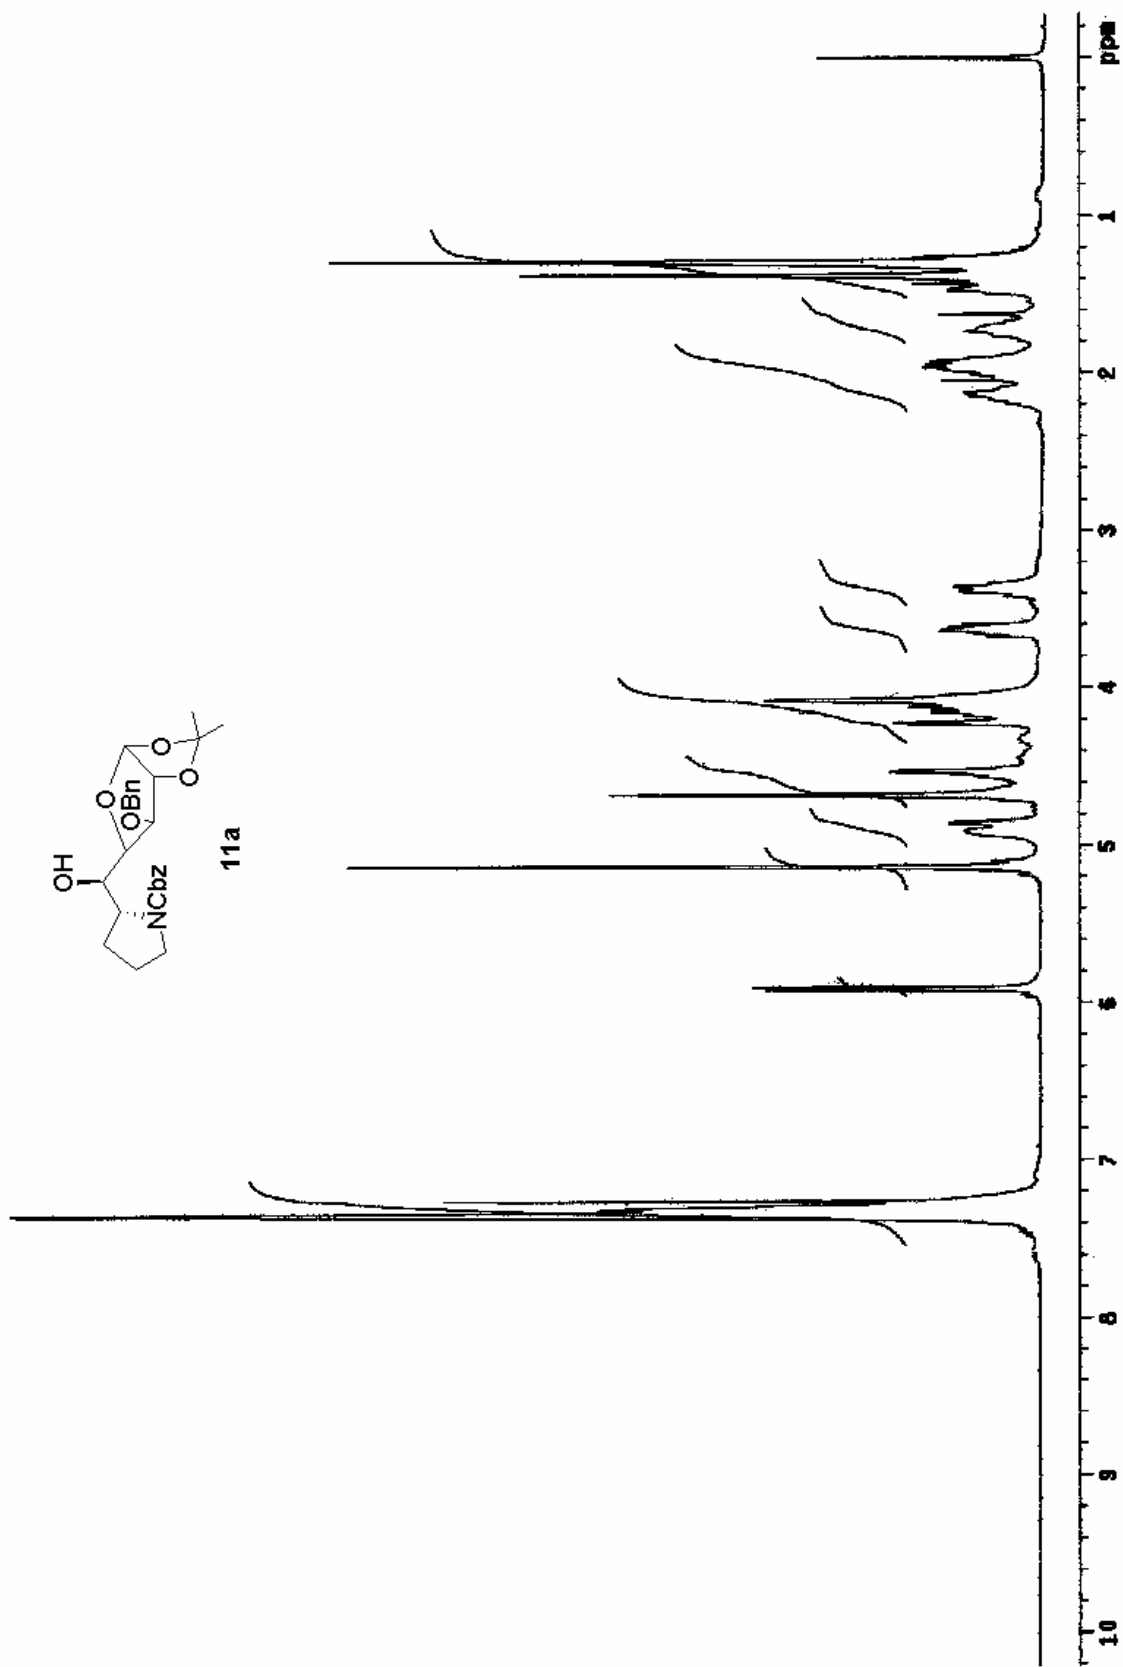

Figure 13: <sup>1</sup>H NMR (300 MHz, CDCl<sub>3</sub>) spectrum of compound 11a

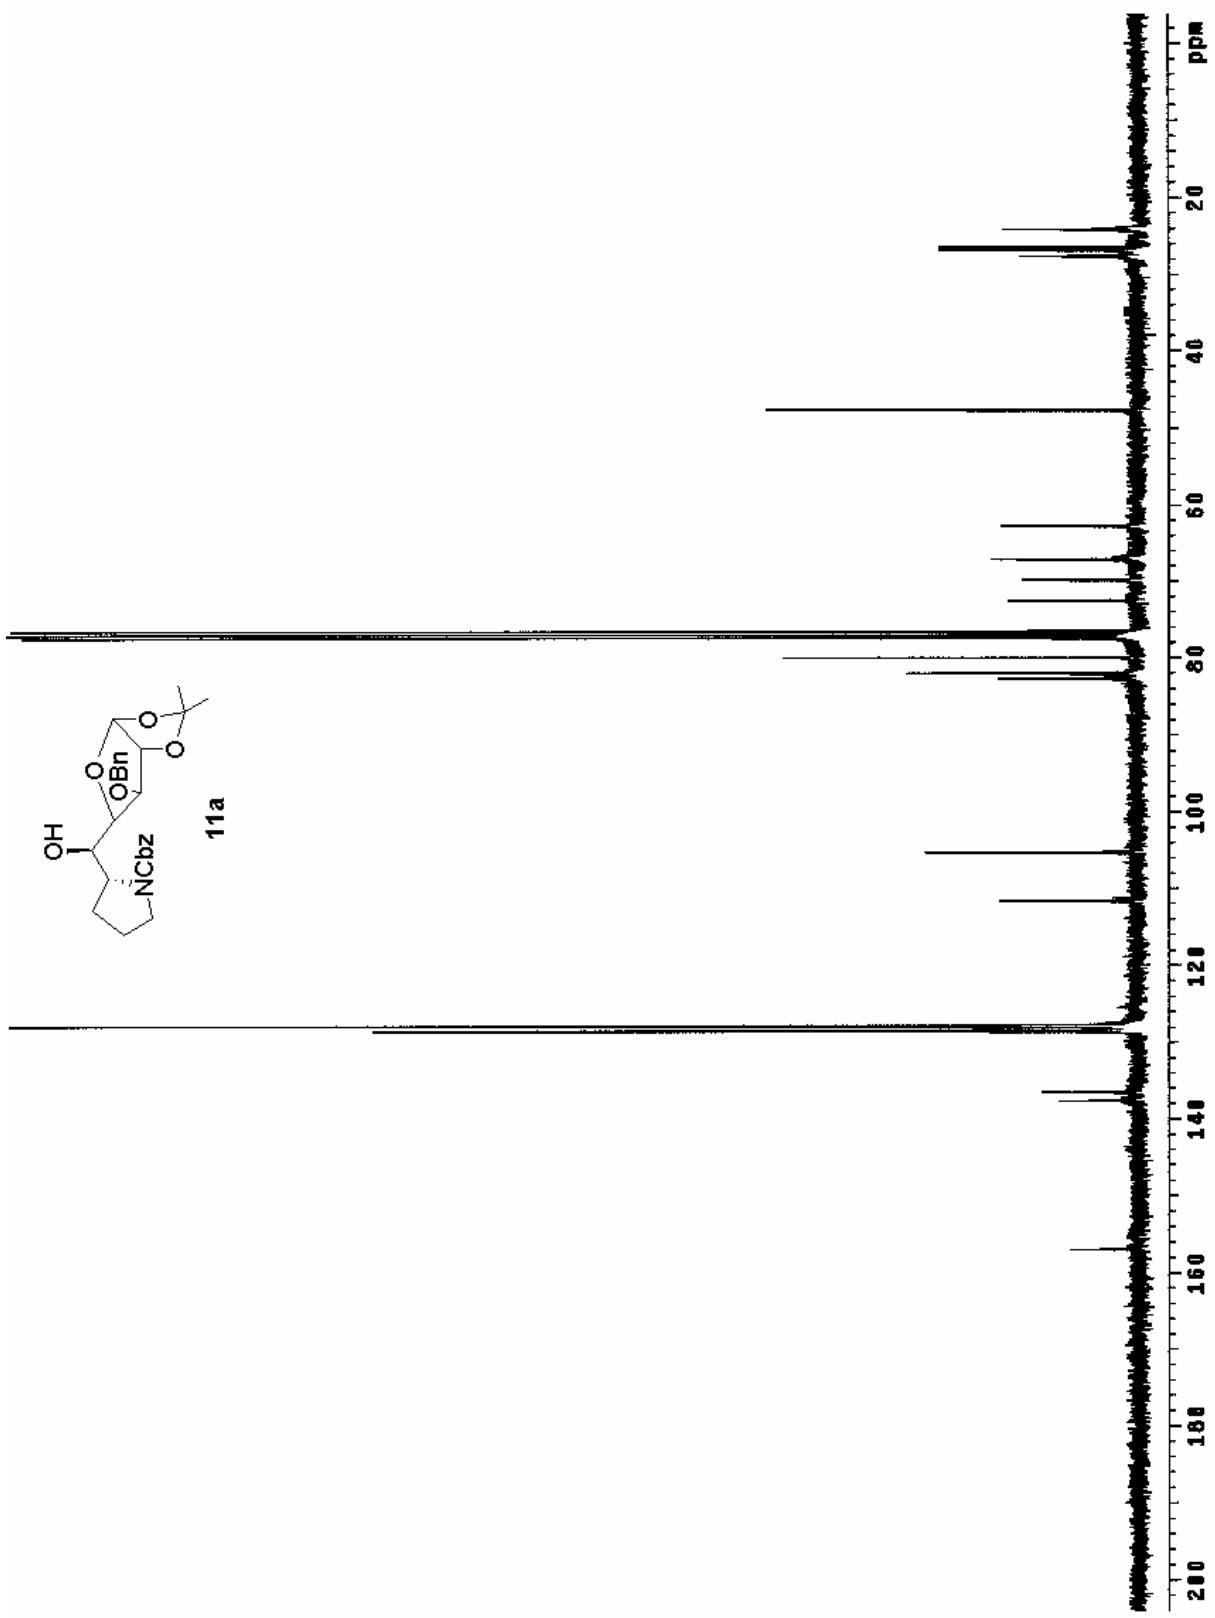

Figure 14: <sup>13</sup>C NMR (75 MHz, CDCl<sub>3</sub>) spectrum of compound 11a



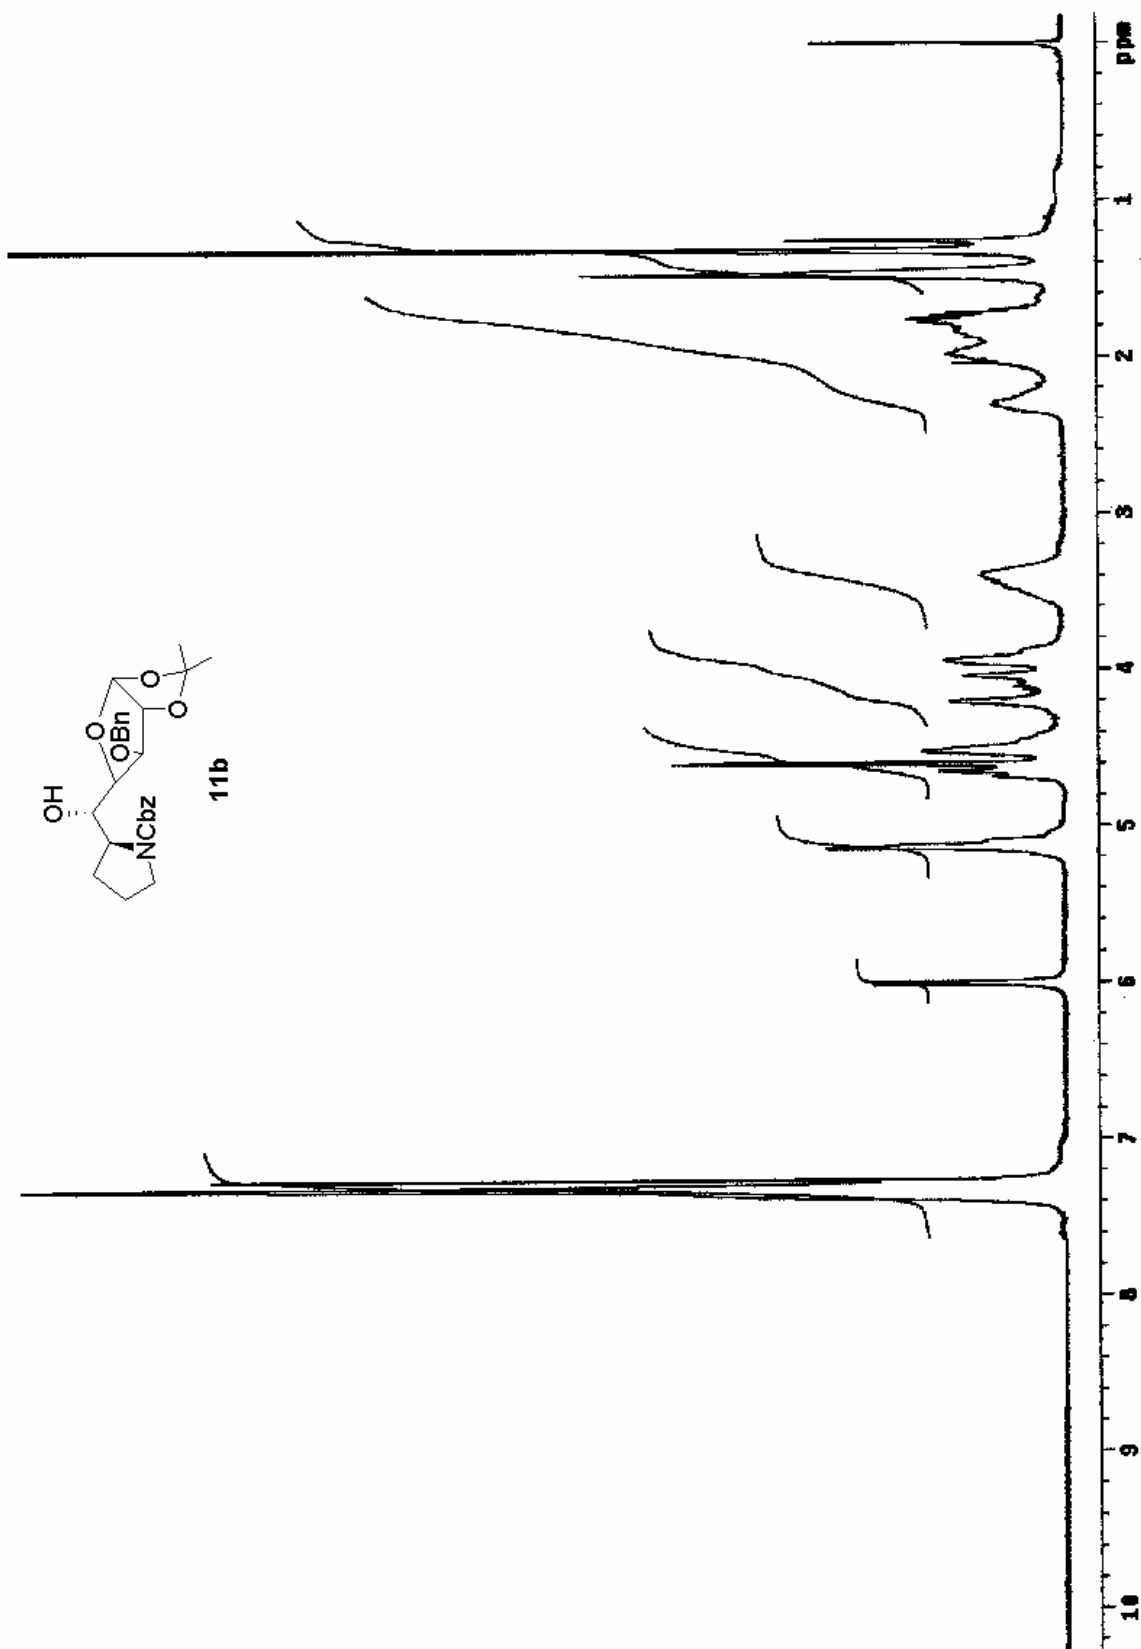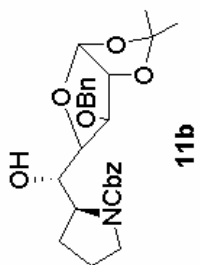

Figure 15: <sup>1</sup>H NMR (300 MHz, CDCl<sub>3</sub>) spectrum of compound 11b

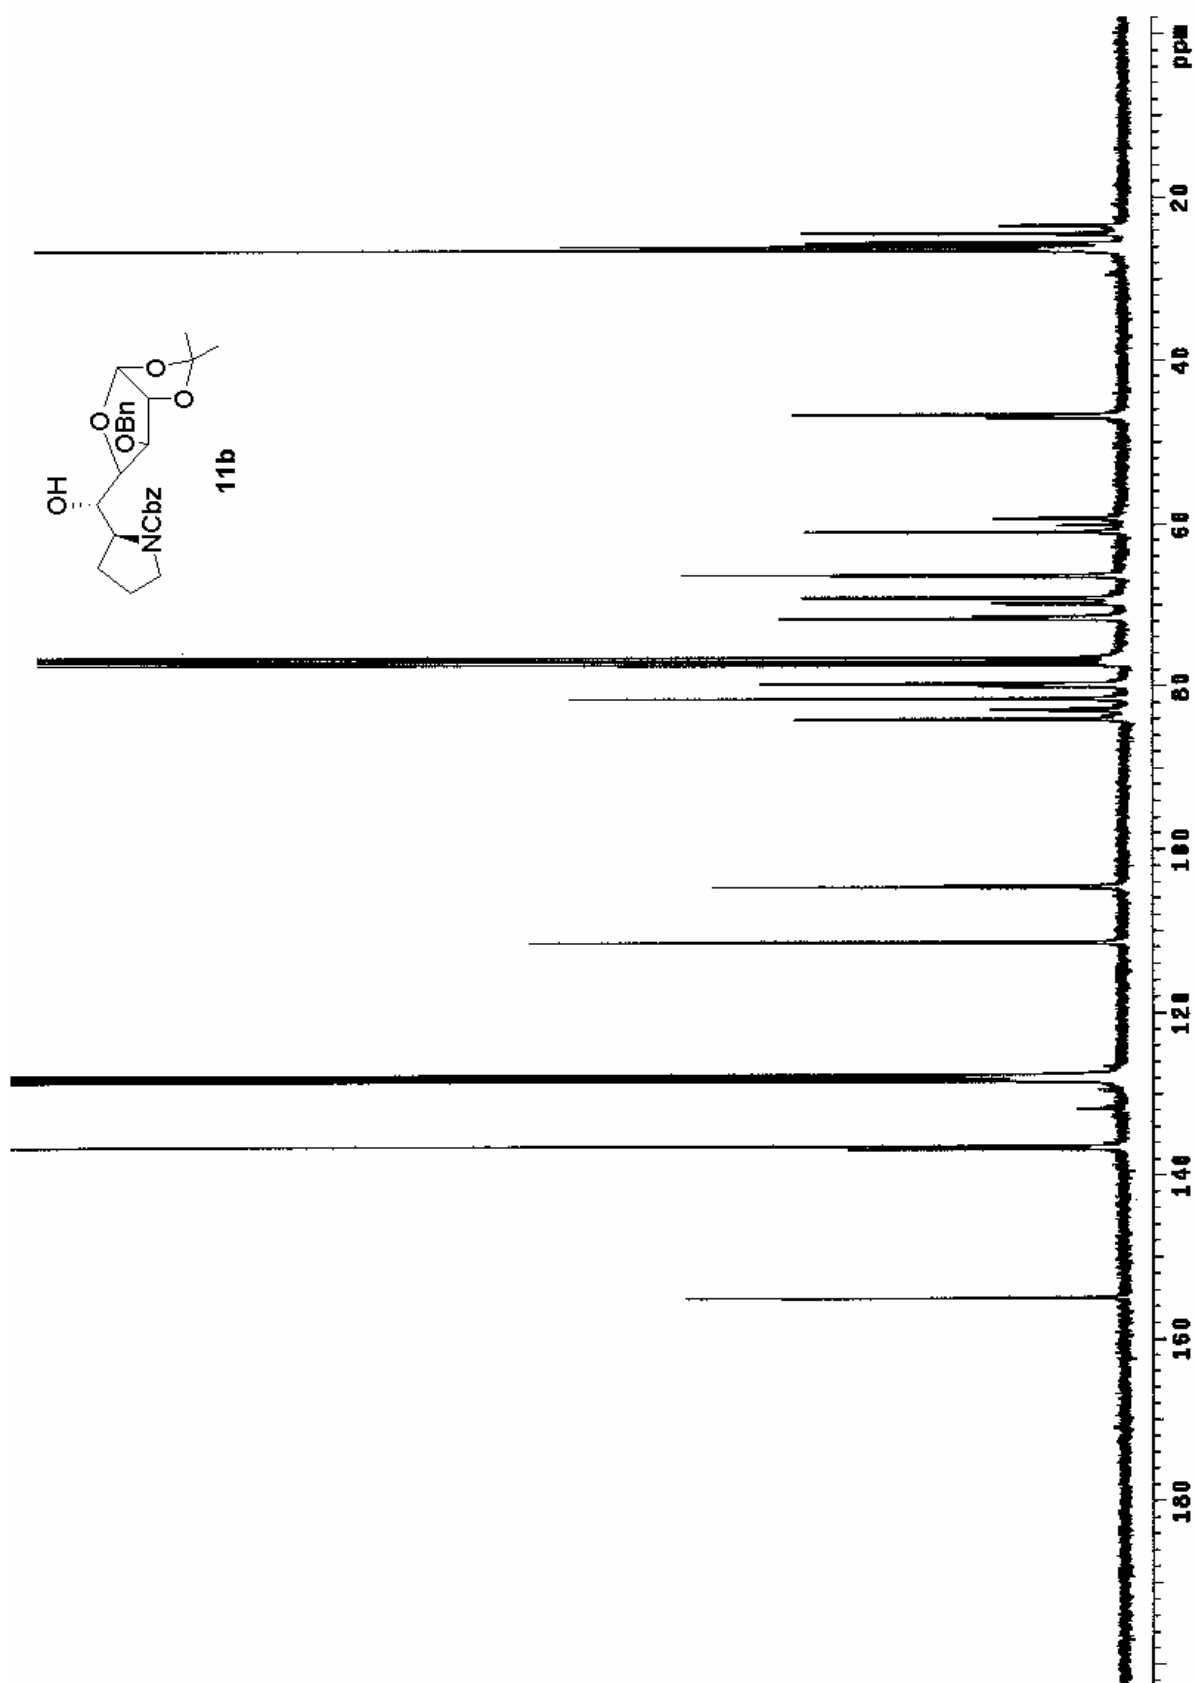

Figure 16. <sup>13</sup>C NMR (75 MHz, CDCl<sub>3</sub>) spectrum of compound 11b

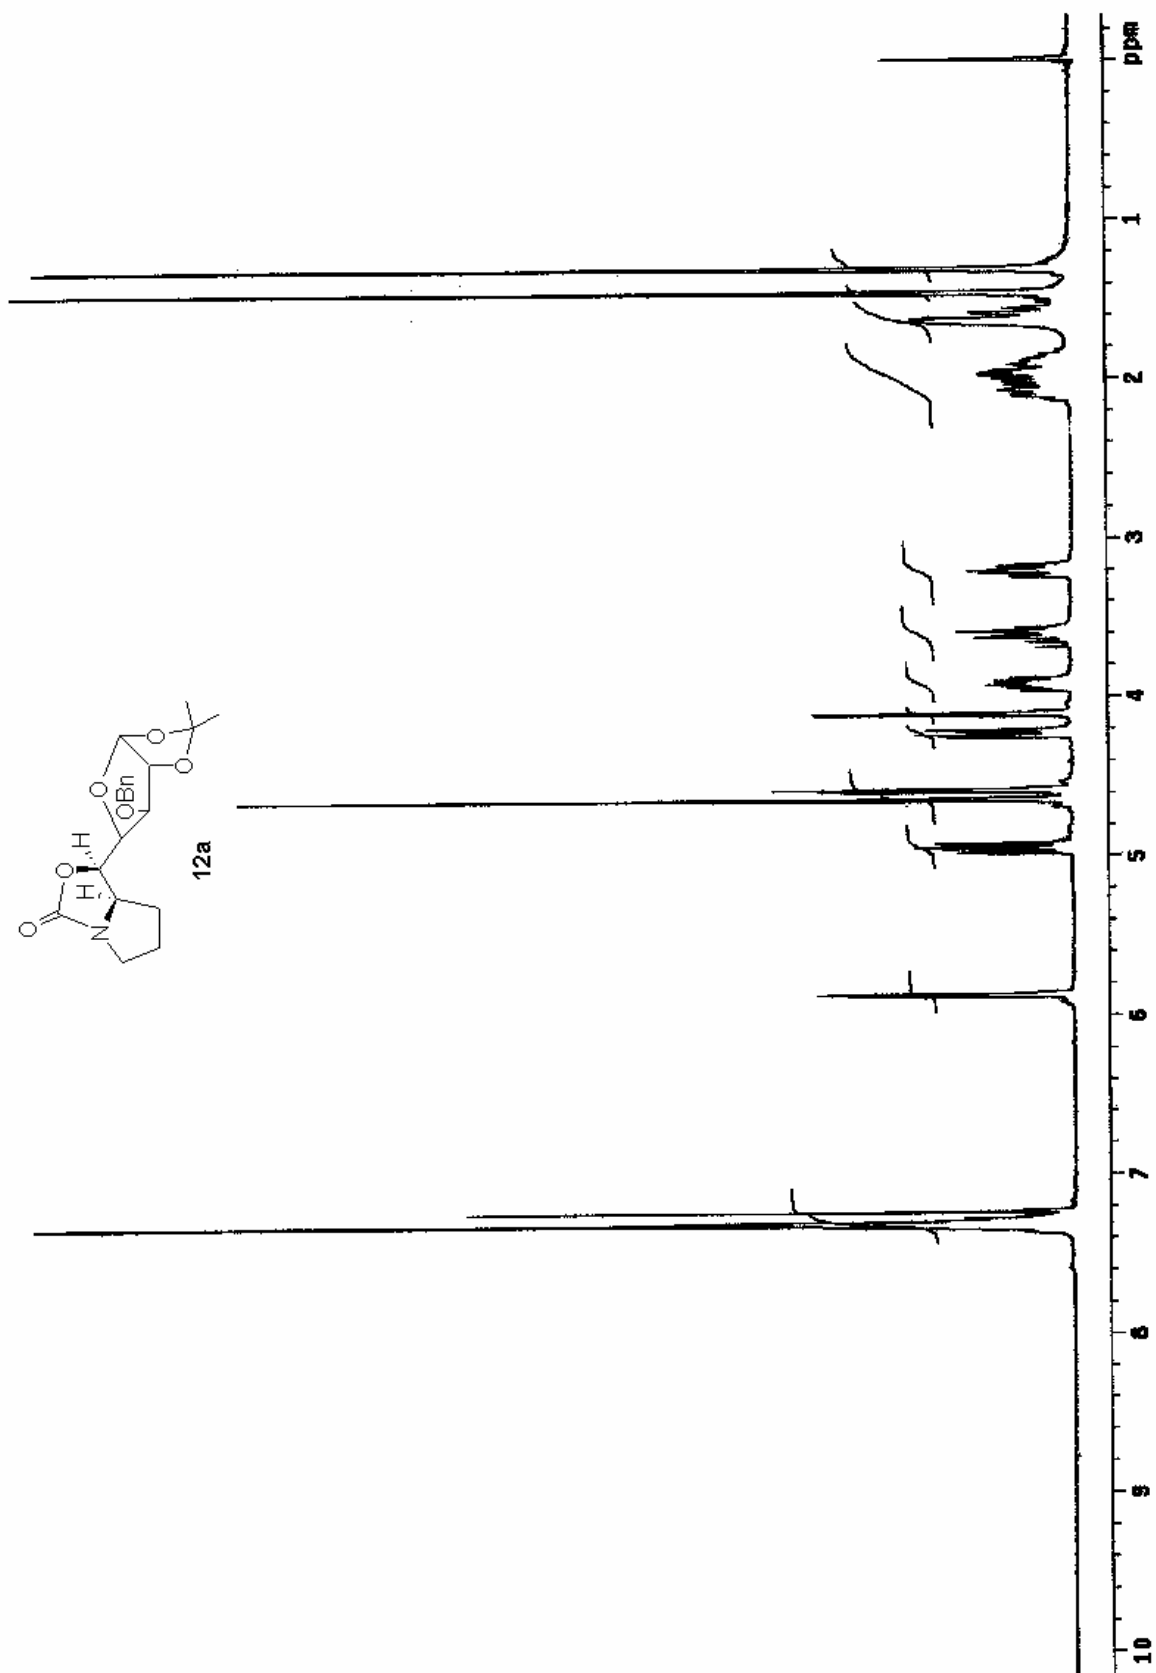

Figure 17: <sup>1</sup>H NMR (300 MHz, CDCl<sub>3</sub>) spectrum of compound 12a

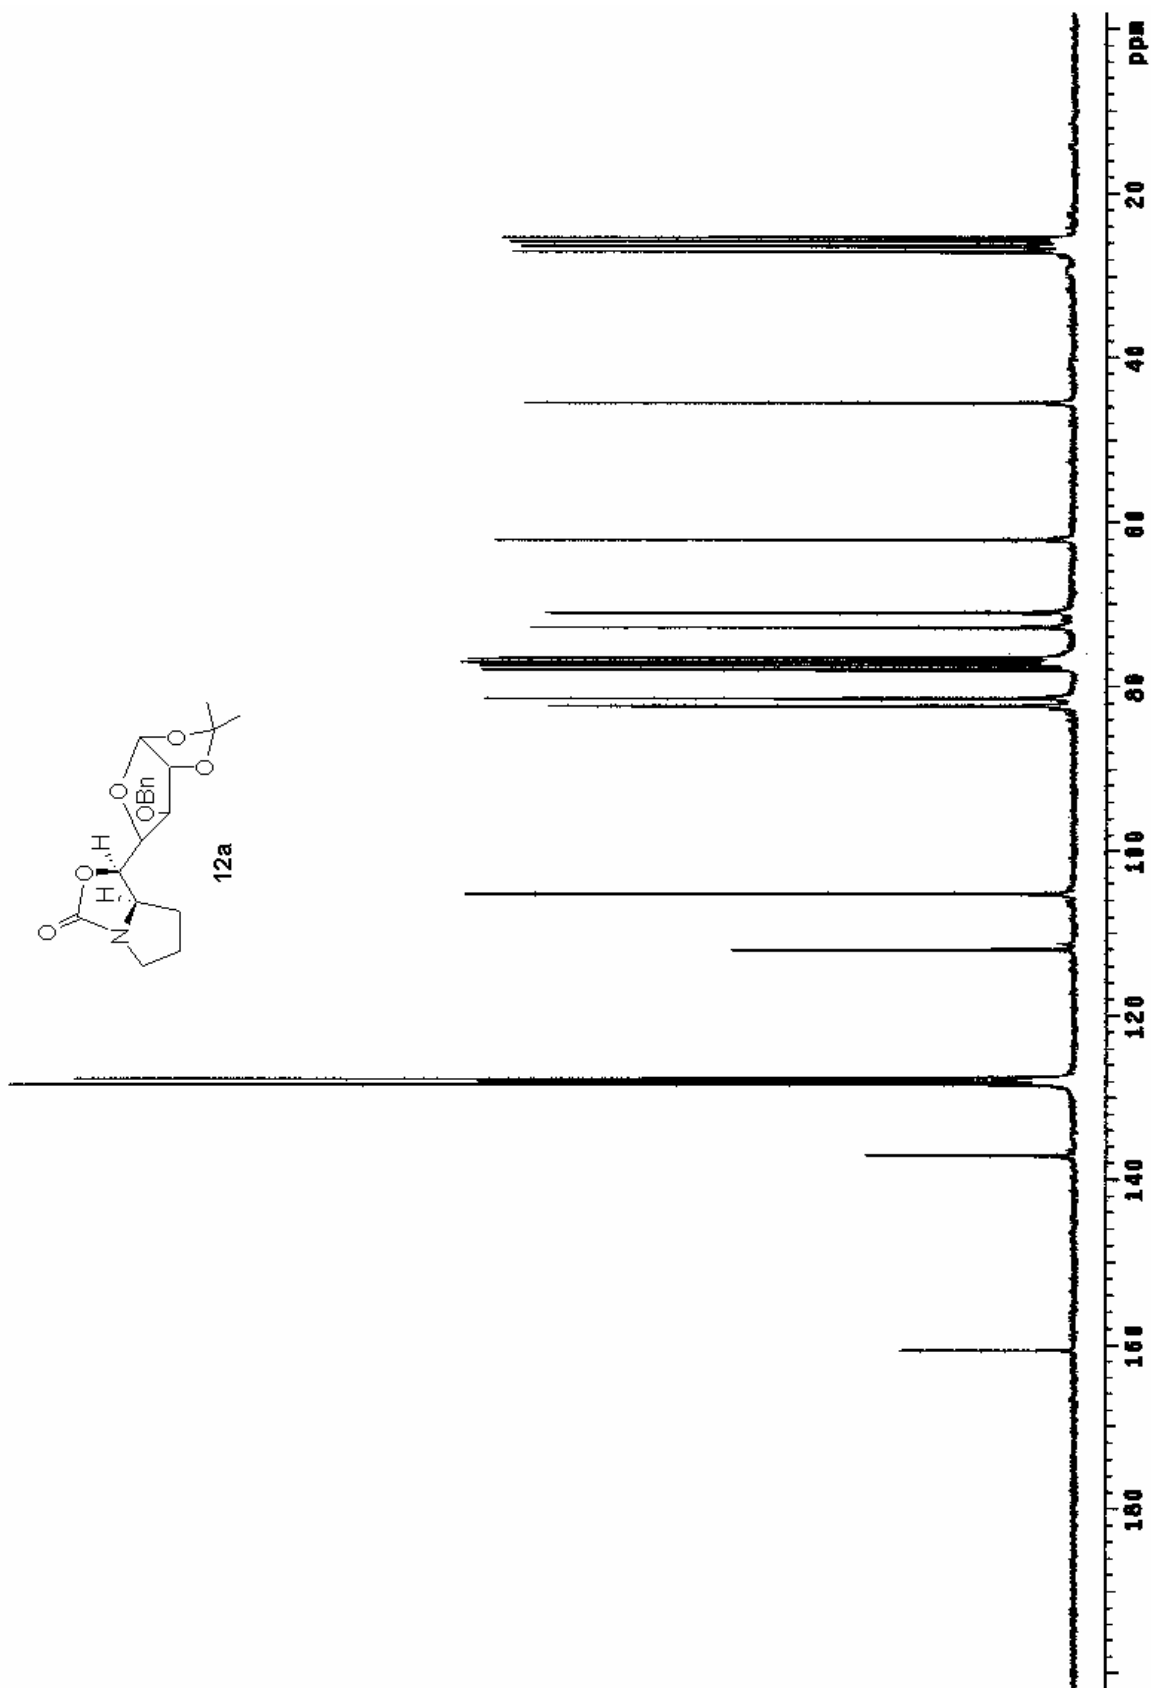

Figure 18:  $^{13}\text{C}$  NMR (75 MHz,  $\text{CDCl}_3$ ) spectrum of compound 12a

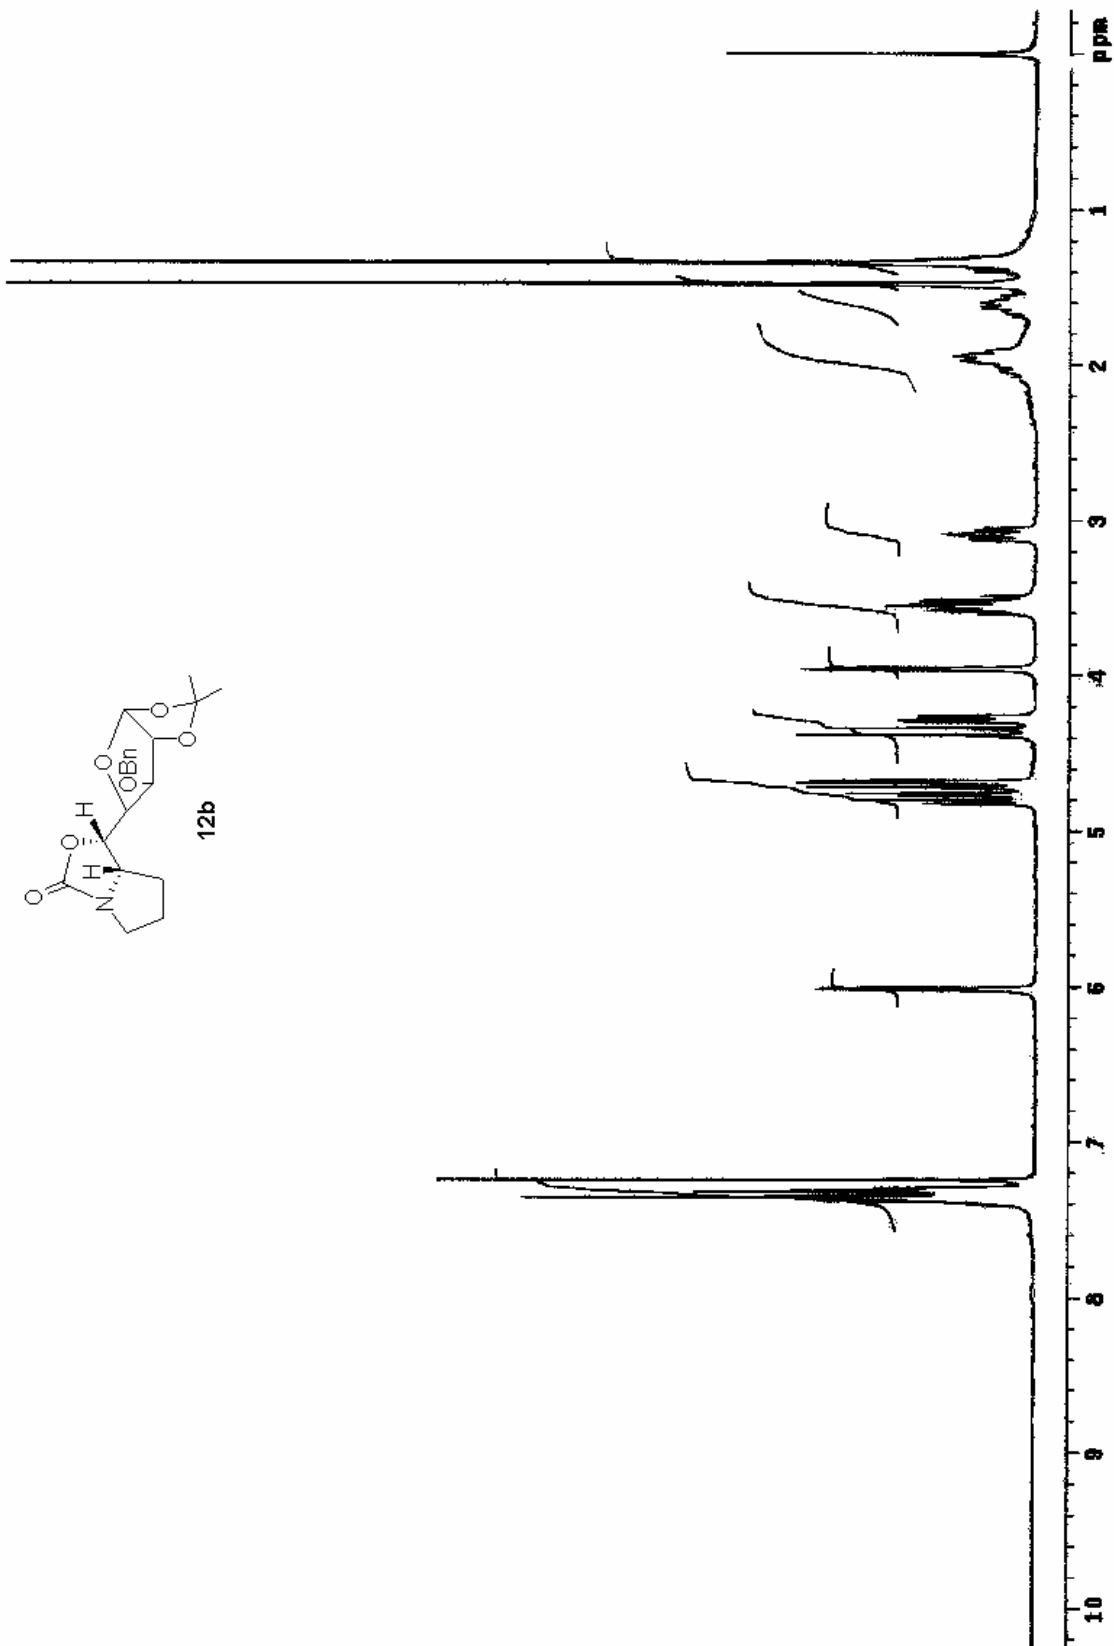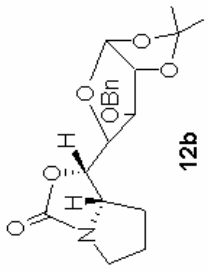

Figure 19: <sup>1</sup>H NMR (300 MHz, CDCl<sub>3</sub>) spectrum of compound 12b

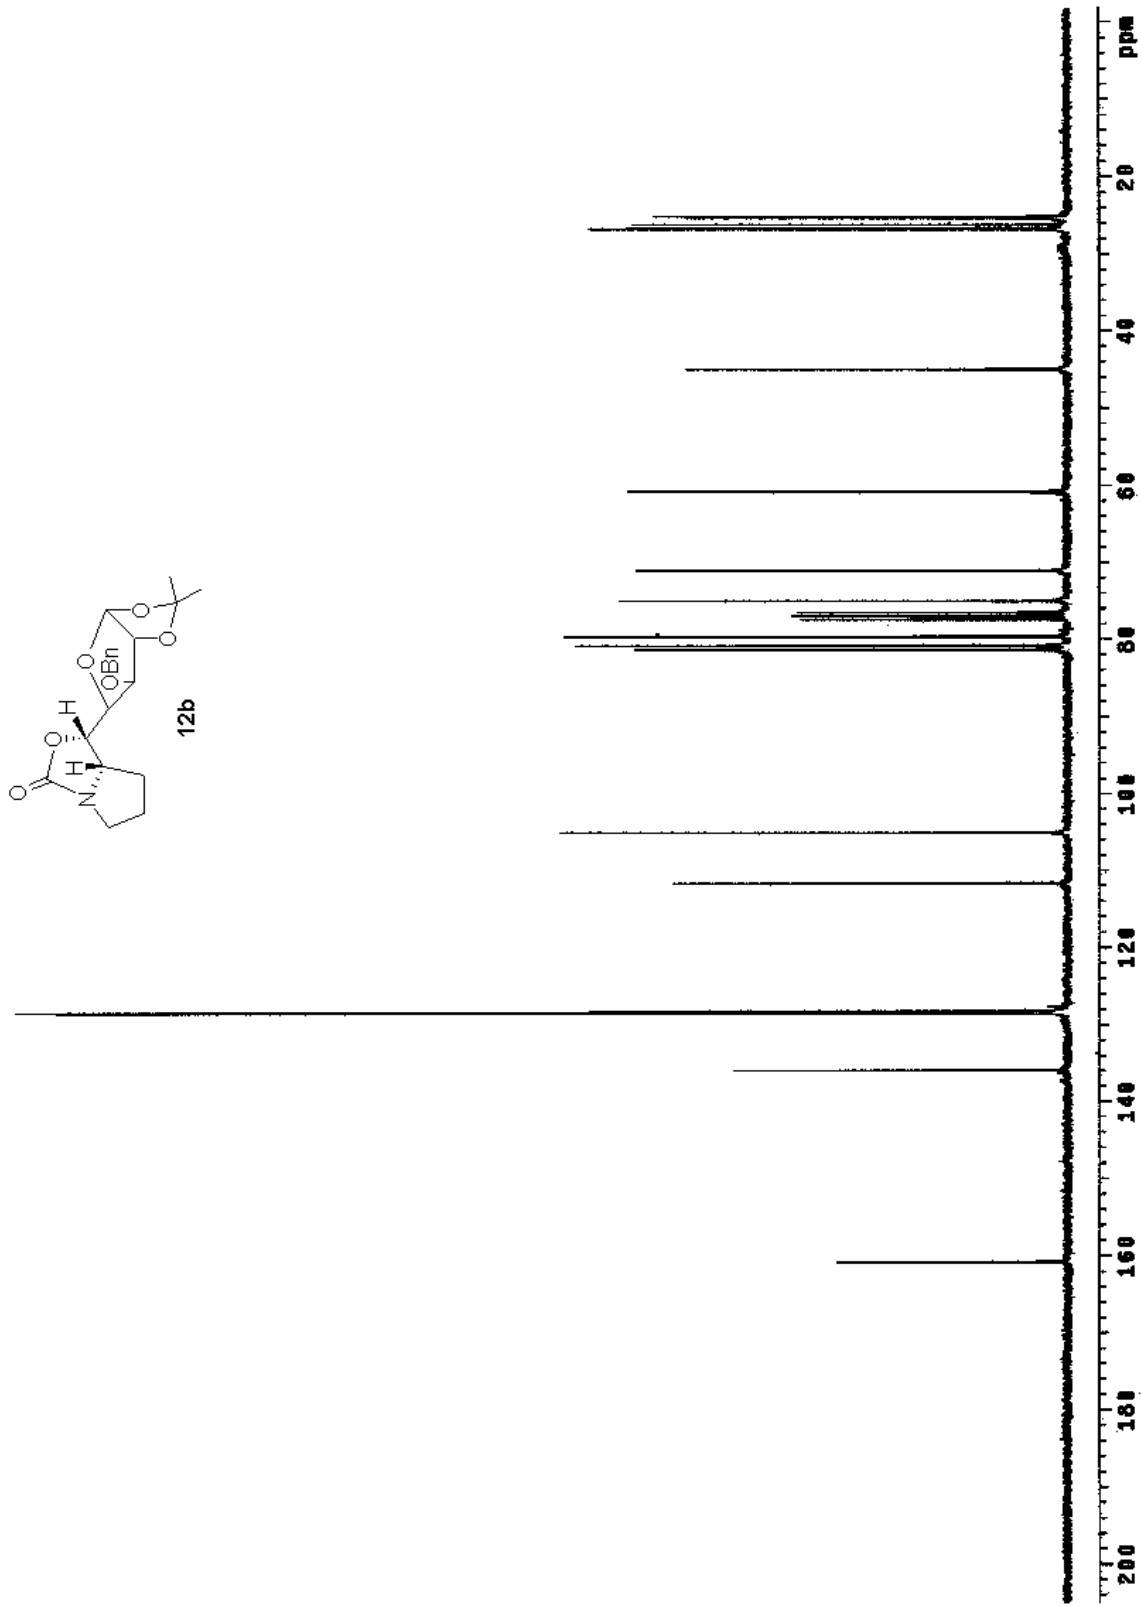

Figure 20:  $^{13}\text{C}$  NMR (75 MHz,  $\text{CDCl}_3$ ) spectrum of compound 12b

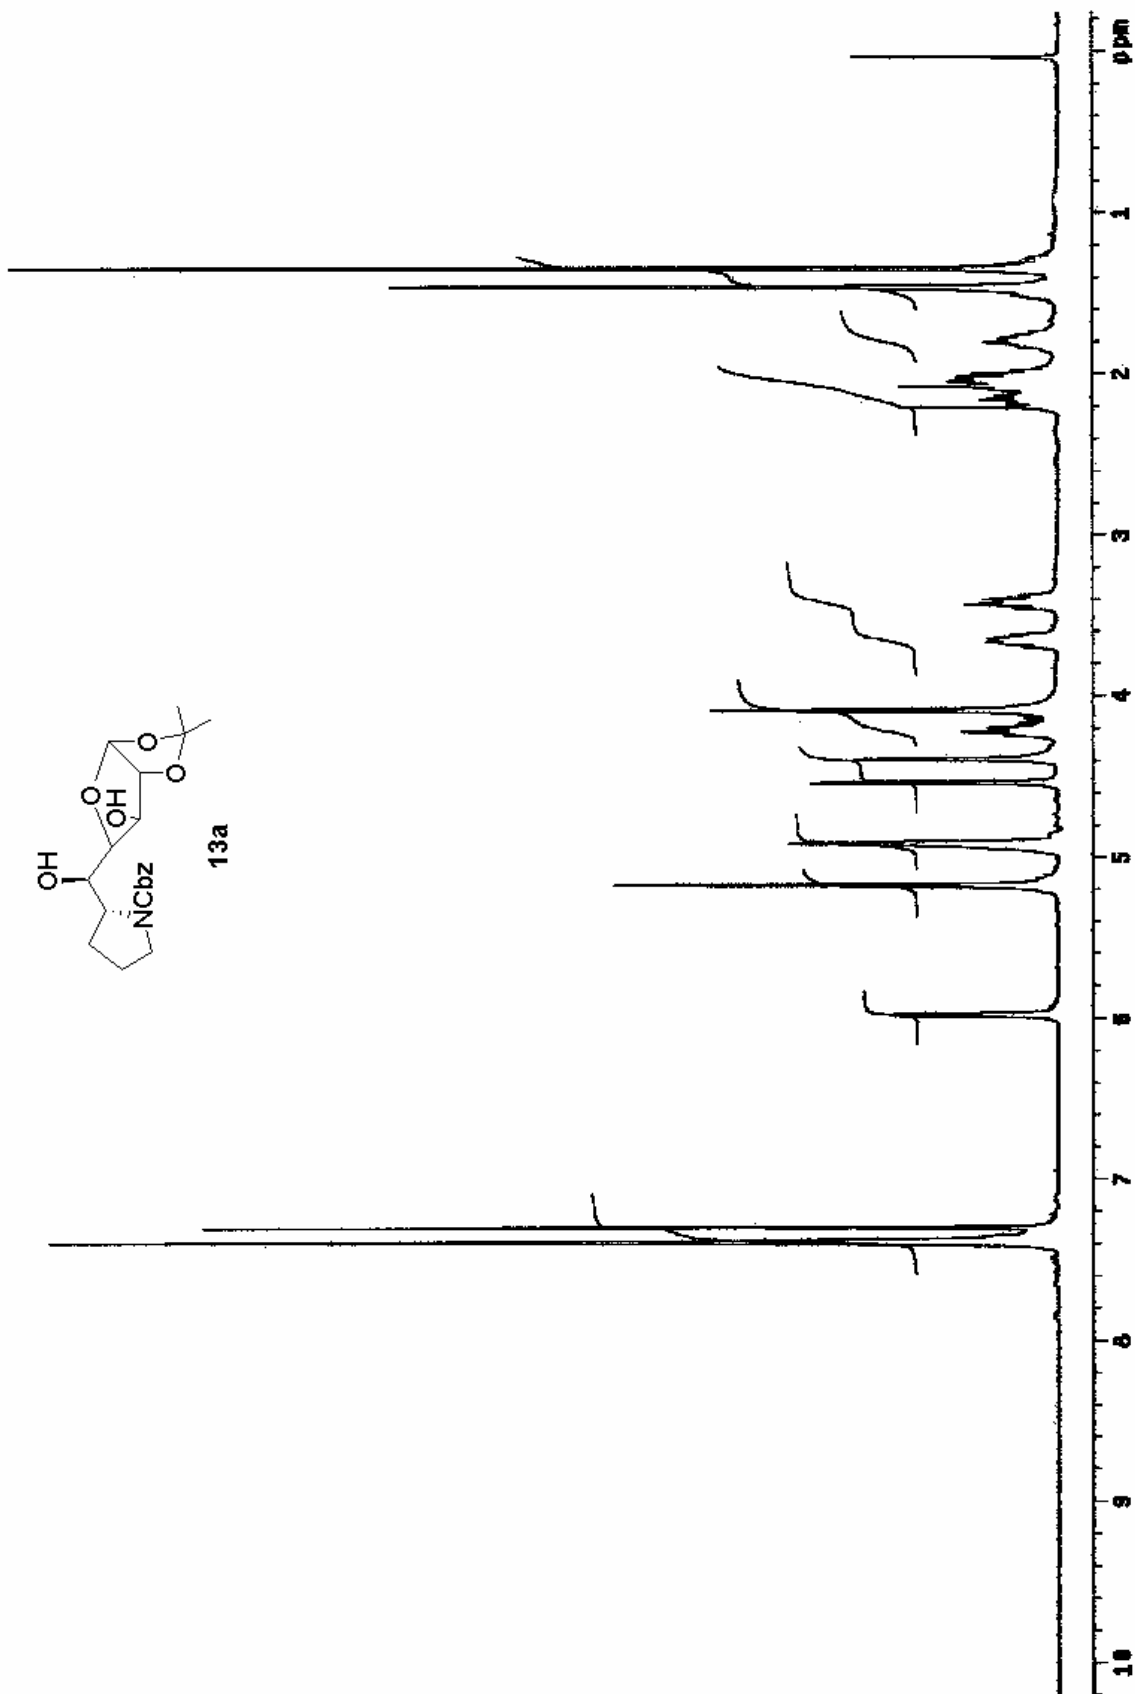

Figure 21: <sup>1</sup>H NMR (300 MHz, CDCl<sub>3</sub>) spectrum of compound 13a

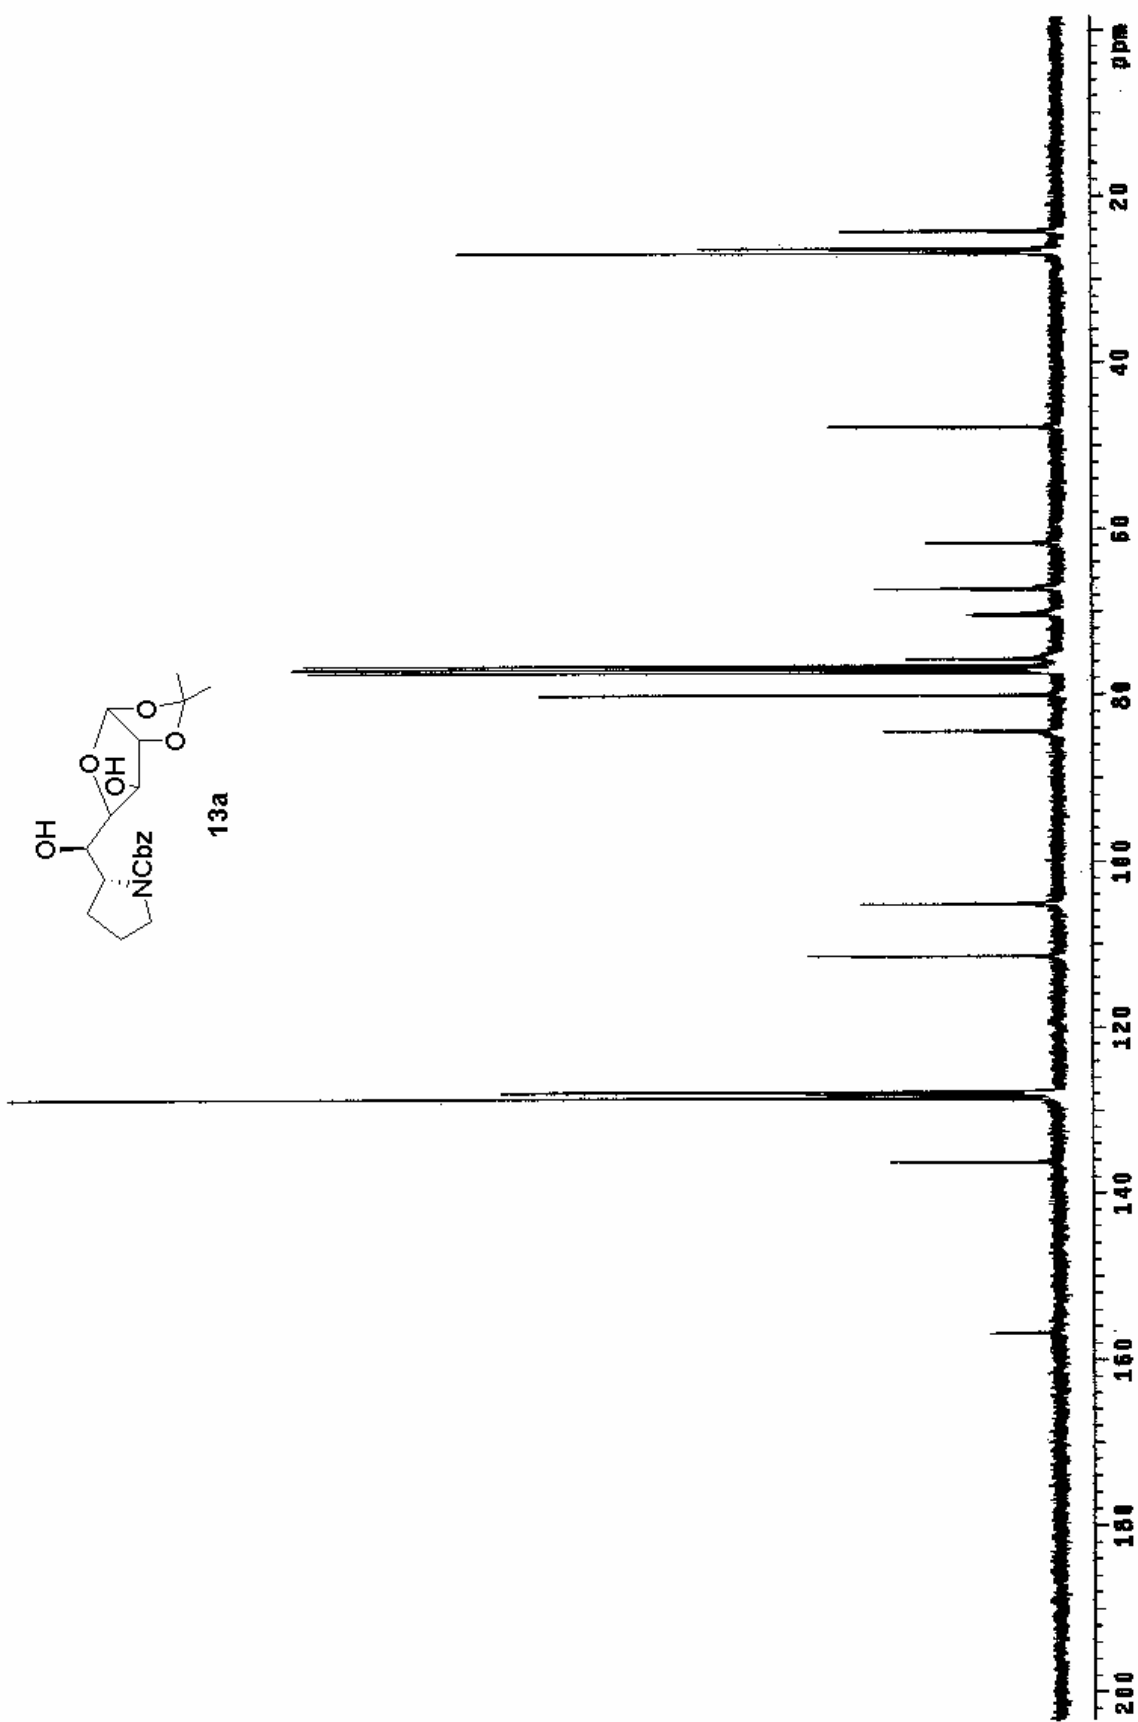

Figure 22:  $^{13}\text{C}$  NMR (75 MHz,  $\text{CDCl}_3$ ) spectrum of compound 13a



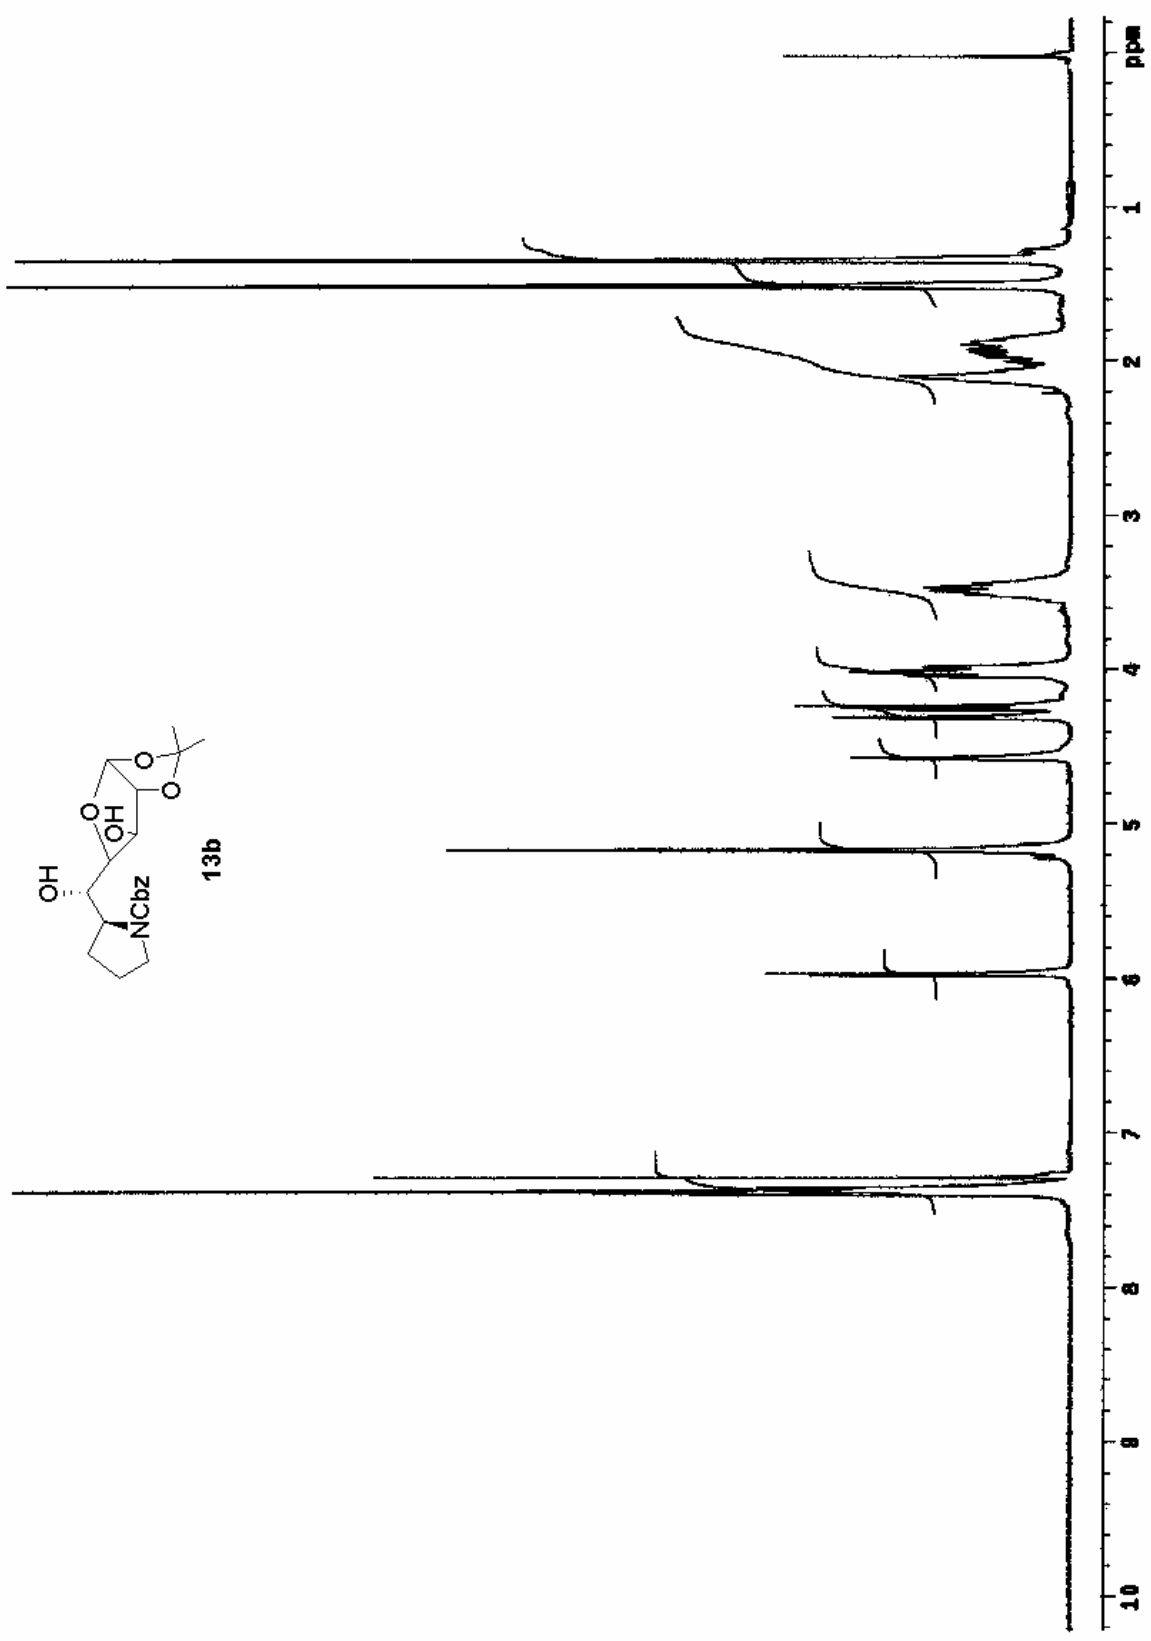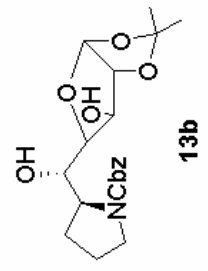

Figure 23: <sup>1</sup>H NMR (300 MHz, CDCl<sub>3</sub>) spectrum of compound 13b

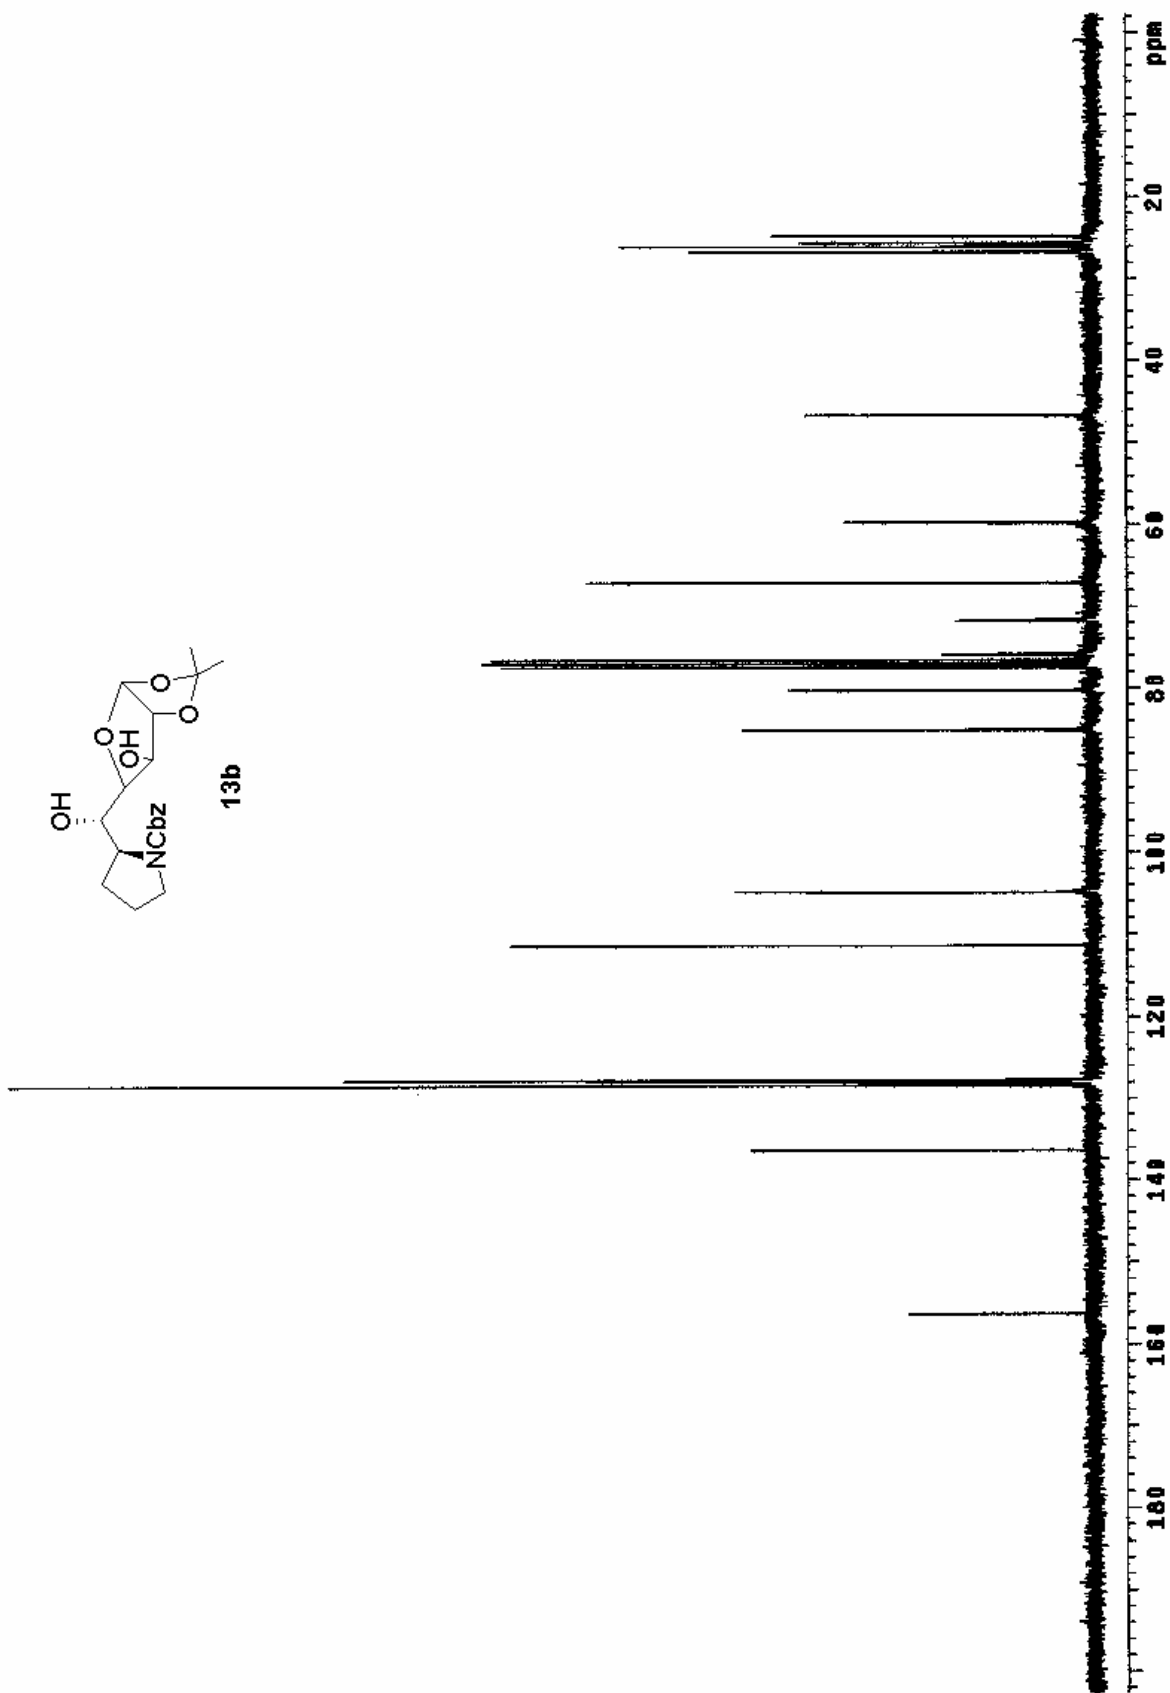

Figure 24: <sup>13</sup>C NMR (75 MHz, CDCl<sub>3</sub>) spectrum of compound 13b

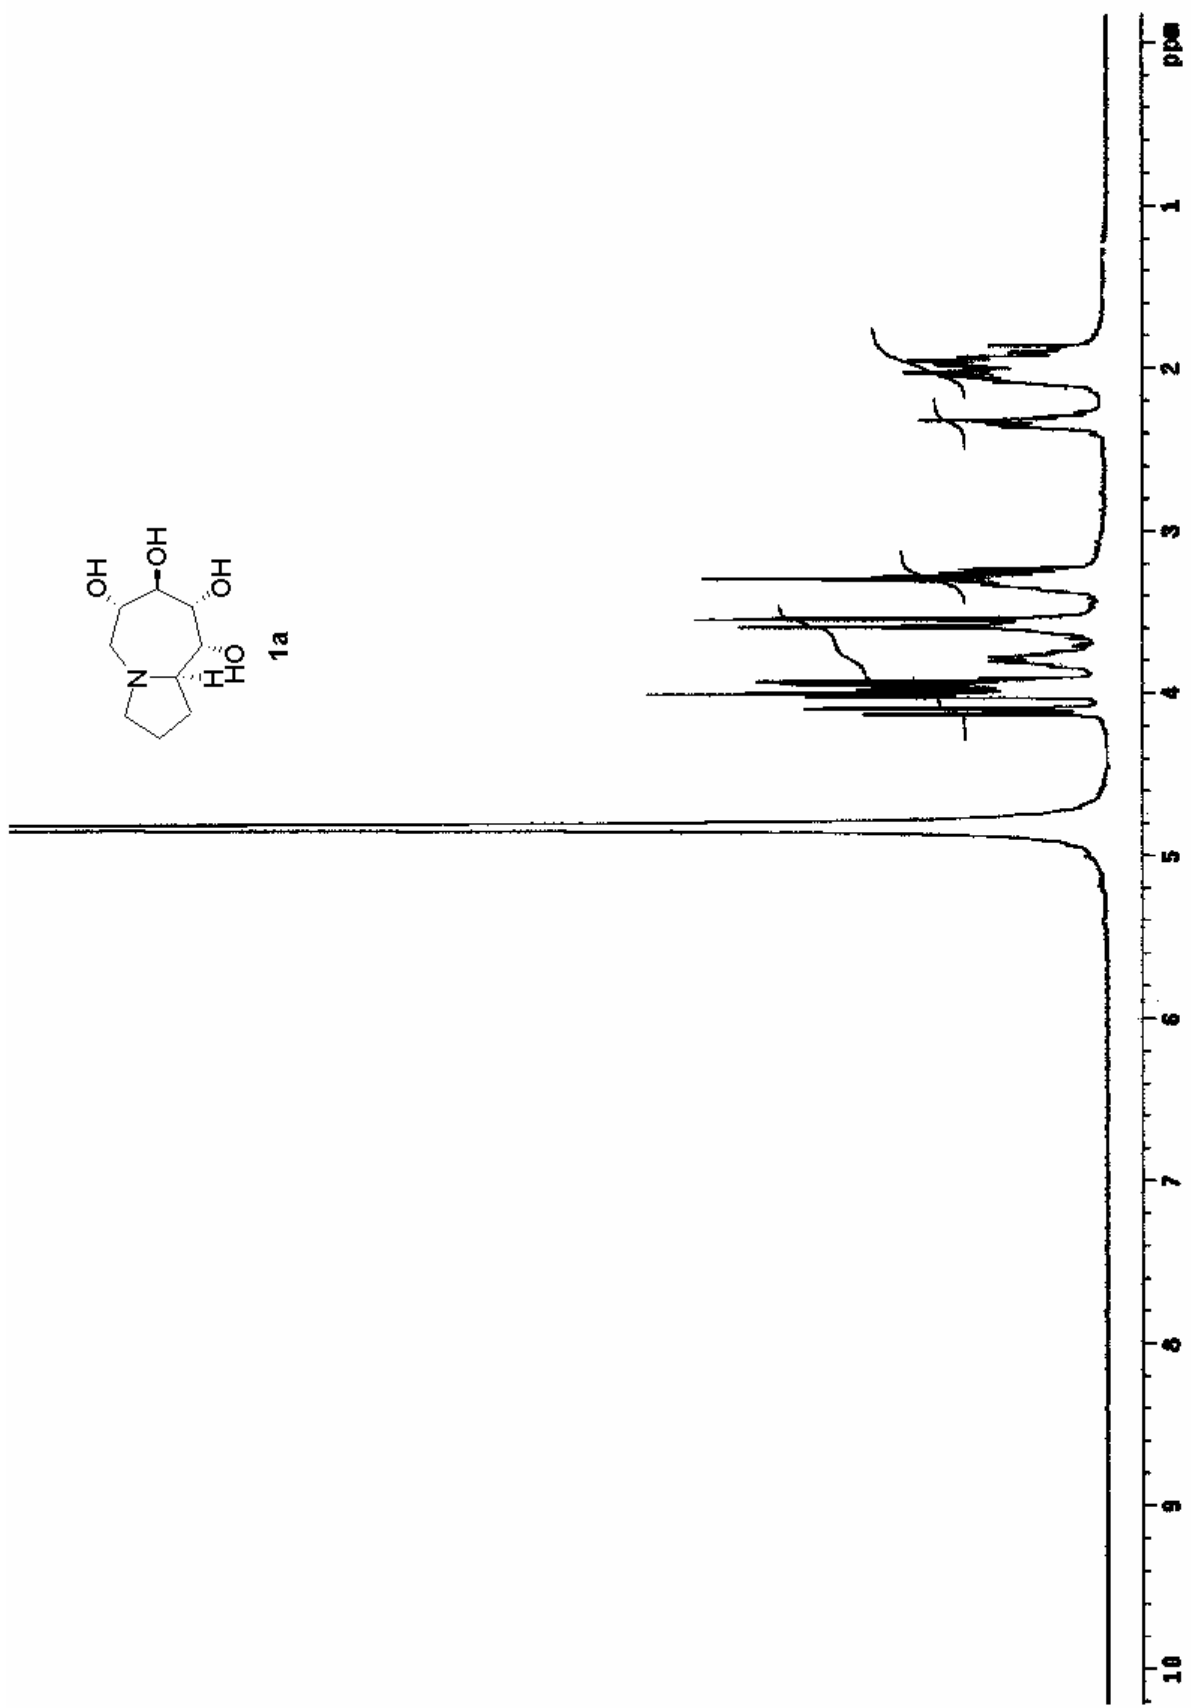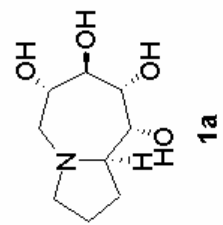

Figure 25: <sup>1</sup>H NMR (300 MHz, CDCl<sub>3</sub>) spectrum of compound 1a

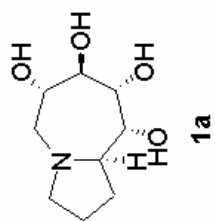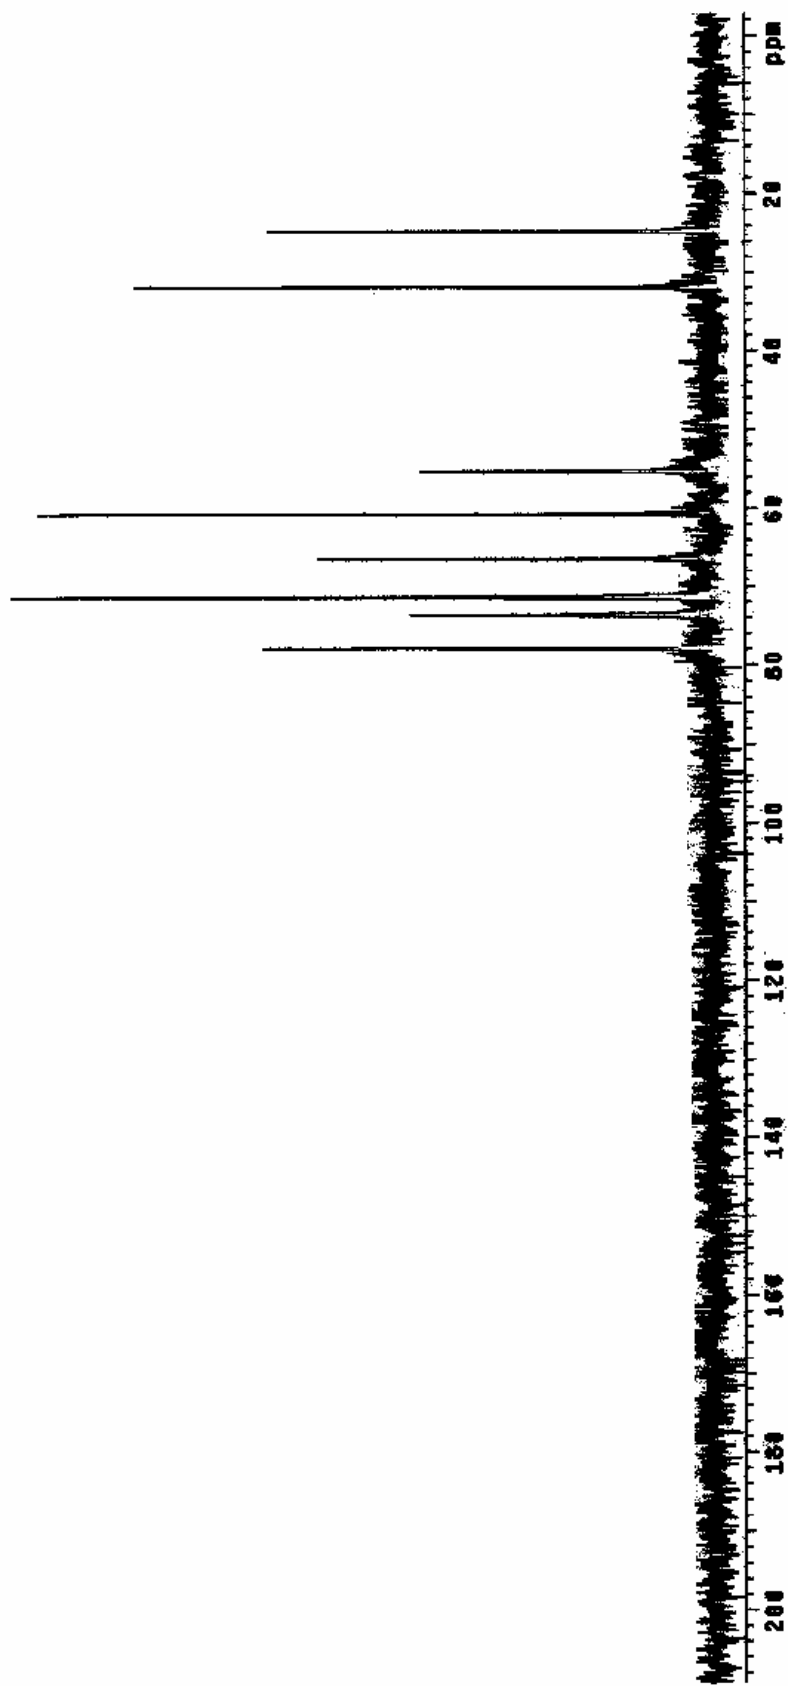

Figure 26: <sup>13</sup>C NMR (75 MHz, CDCl<sub>3</sub>) spectrum of compound 1a

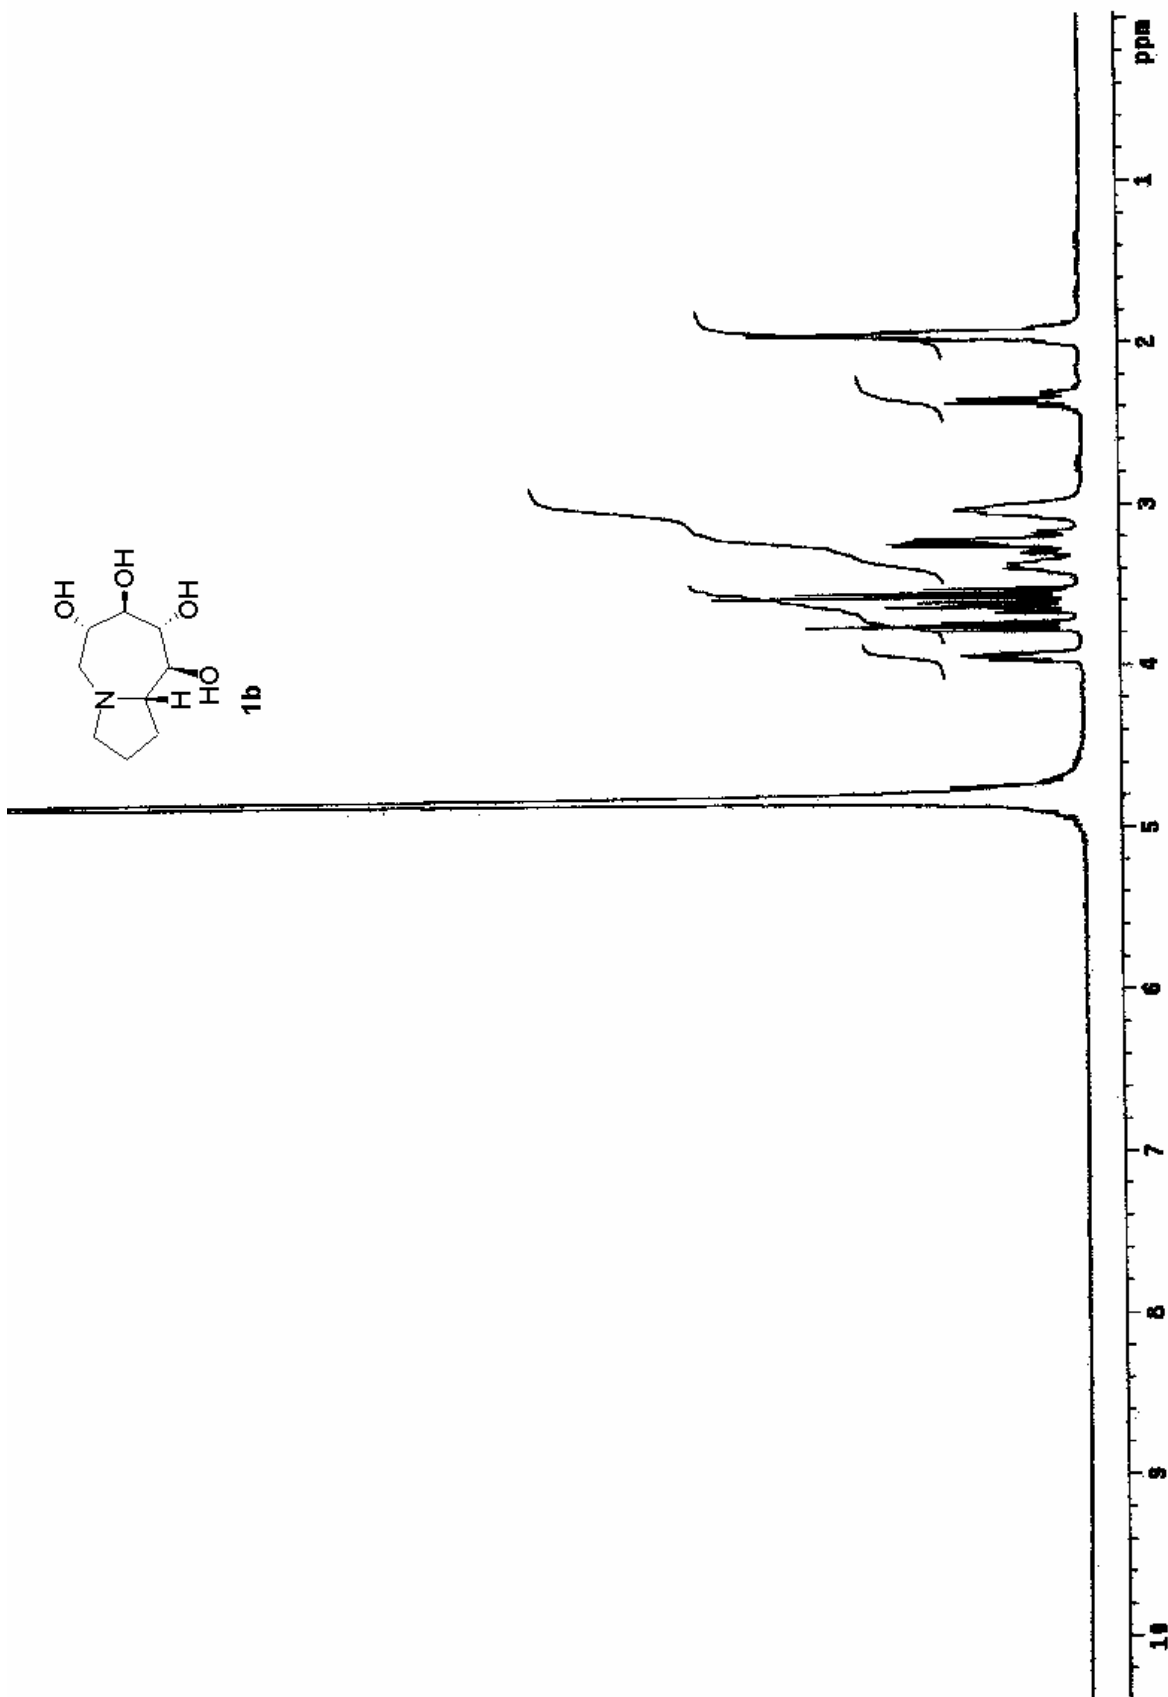

Figure 27: <sup>1</sup>H NMR (300 MHz, CDCl<sub>3</sub>) spectrum of compound 1b

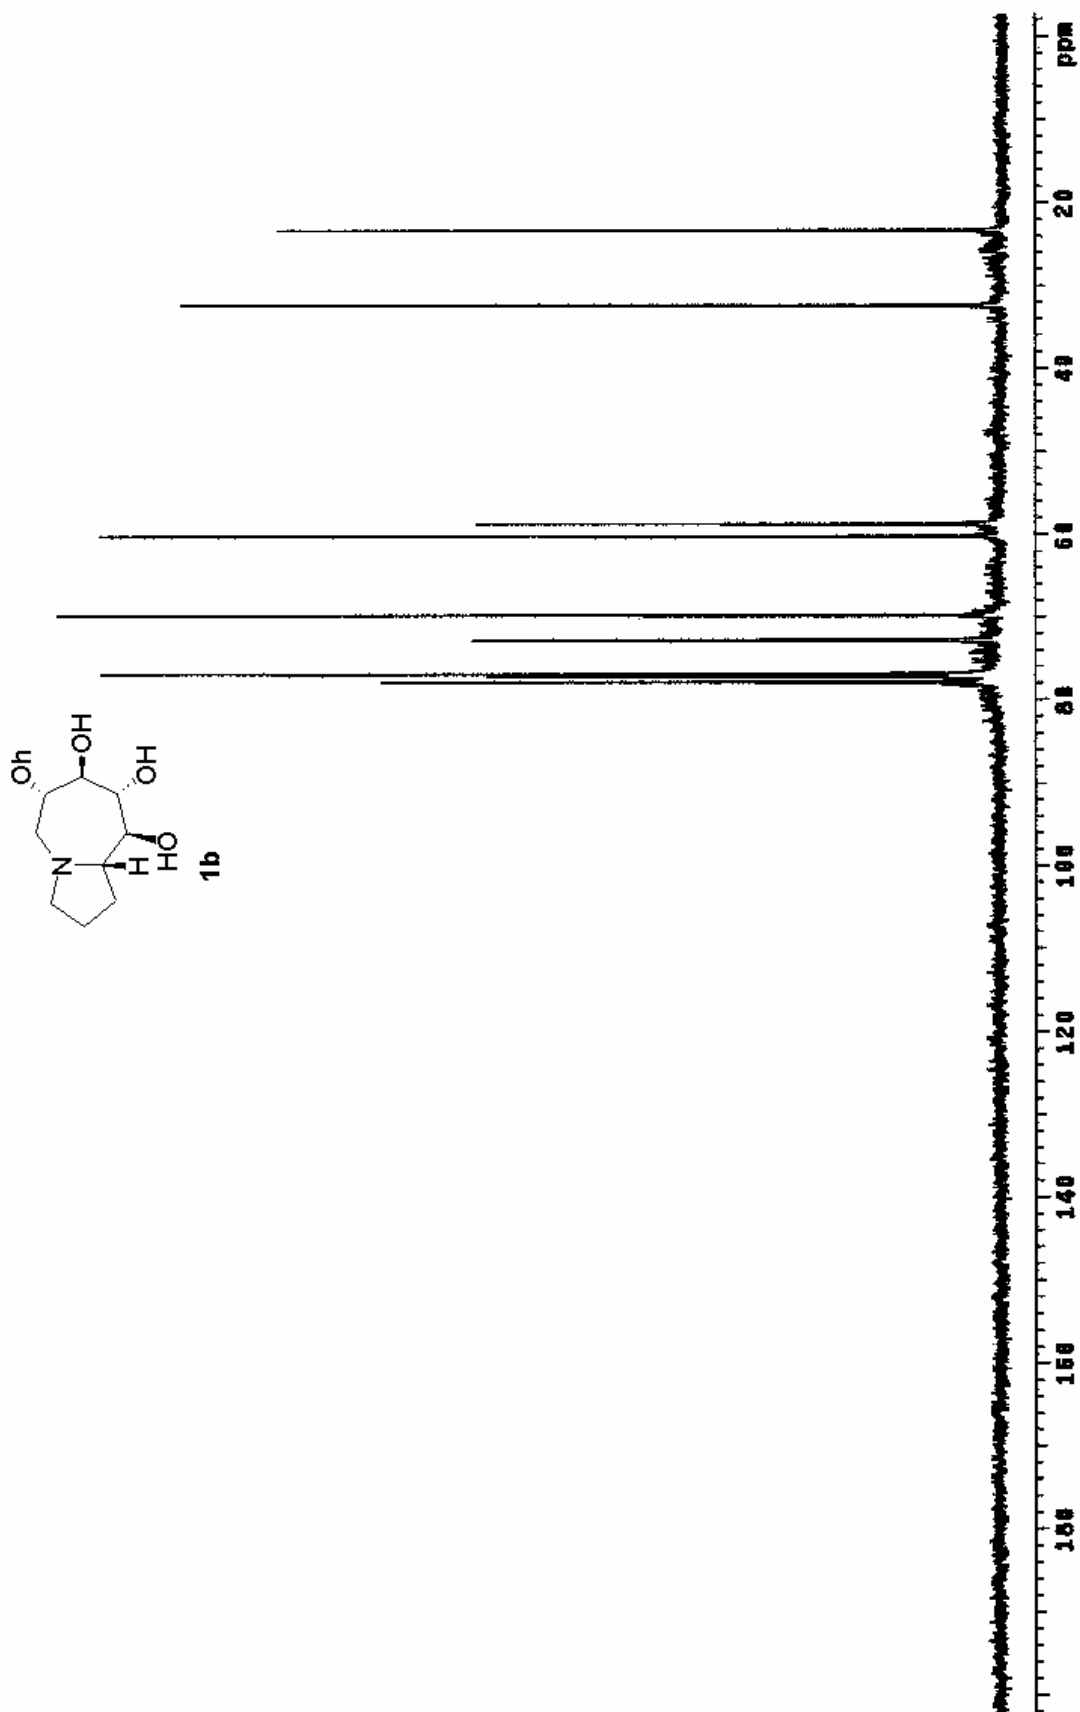

Figure 28: <sup>13</sup>C NMR (75 MHz, CDCl<sub>3</sub>) spectrum of compound 1b

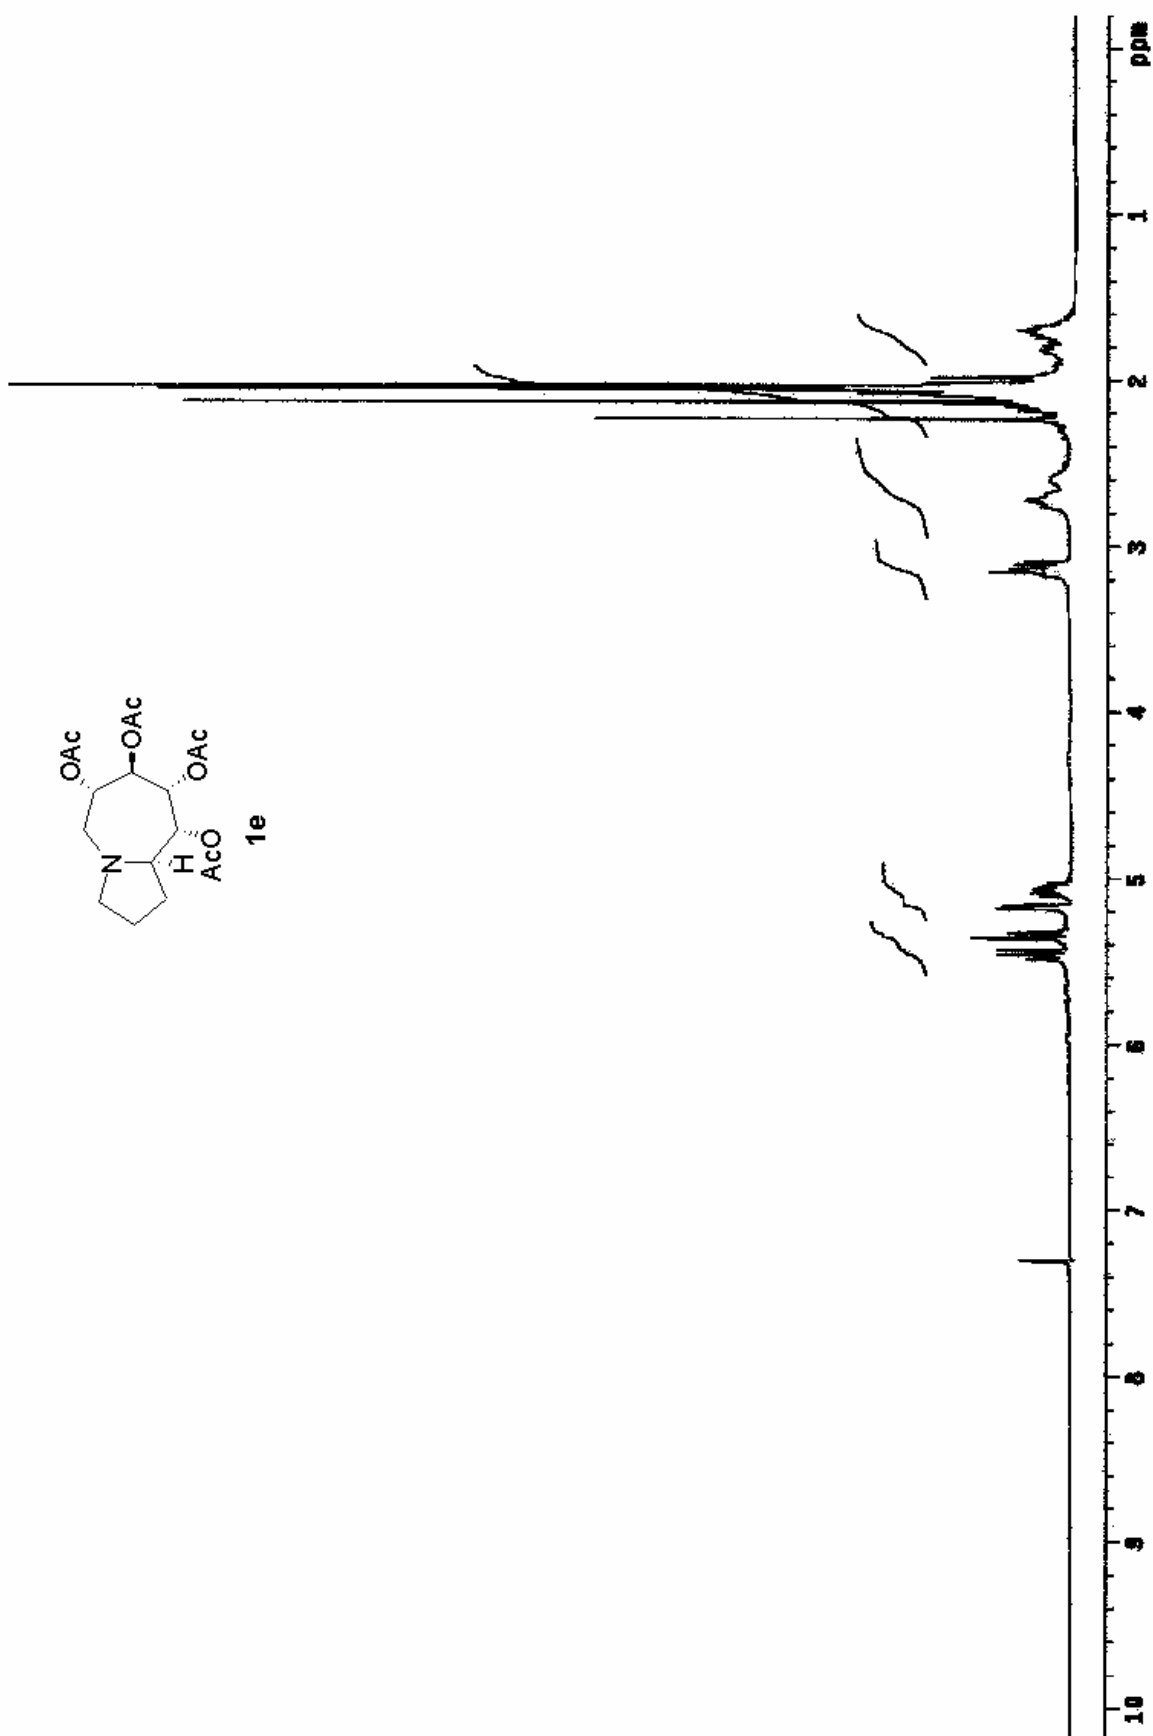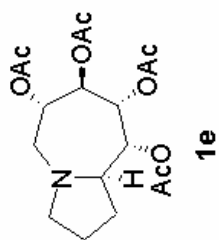

Figure 29: <sup>1</sup>H NMR (300 MHz, CDCl<sub>3</sub>) spectrum of compound 1e

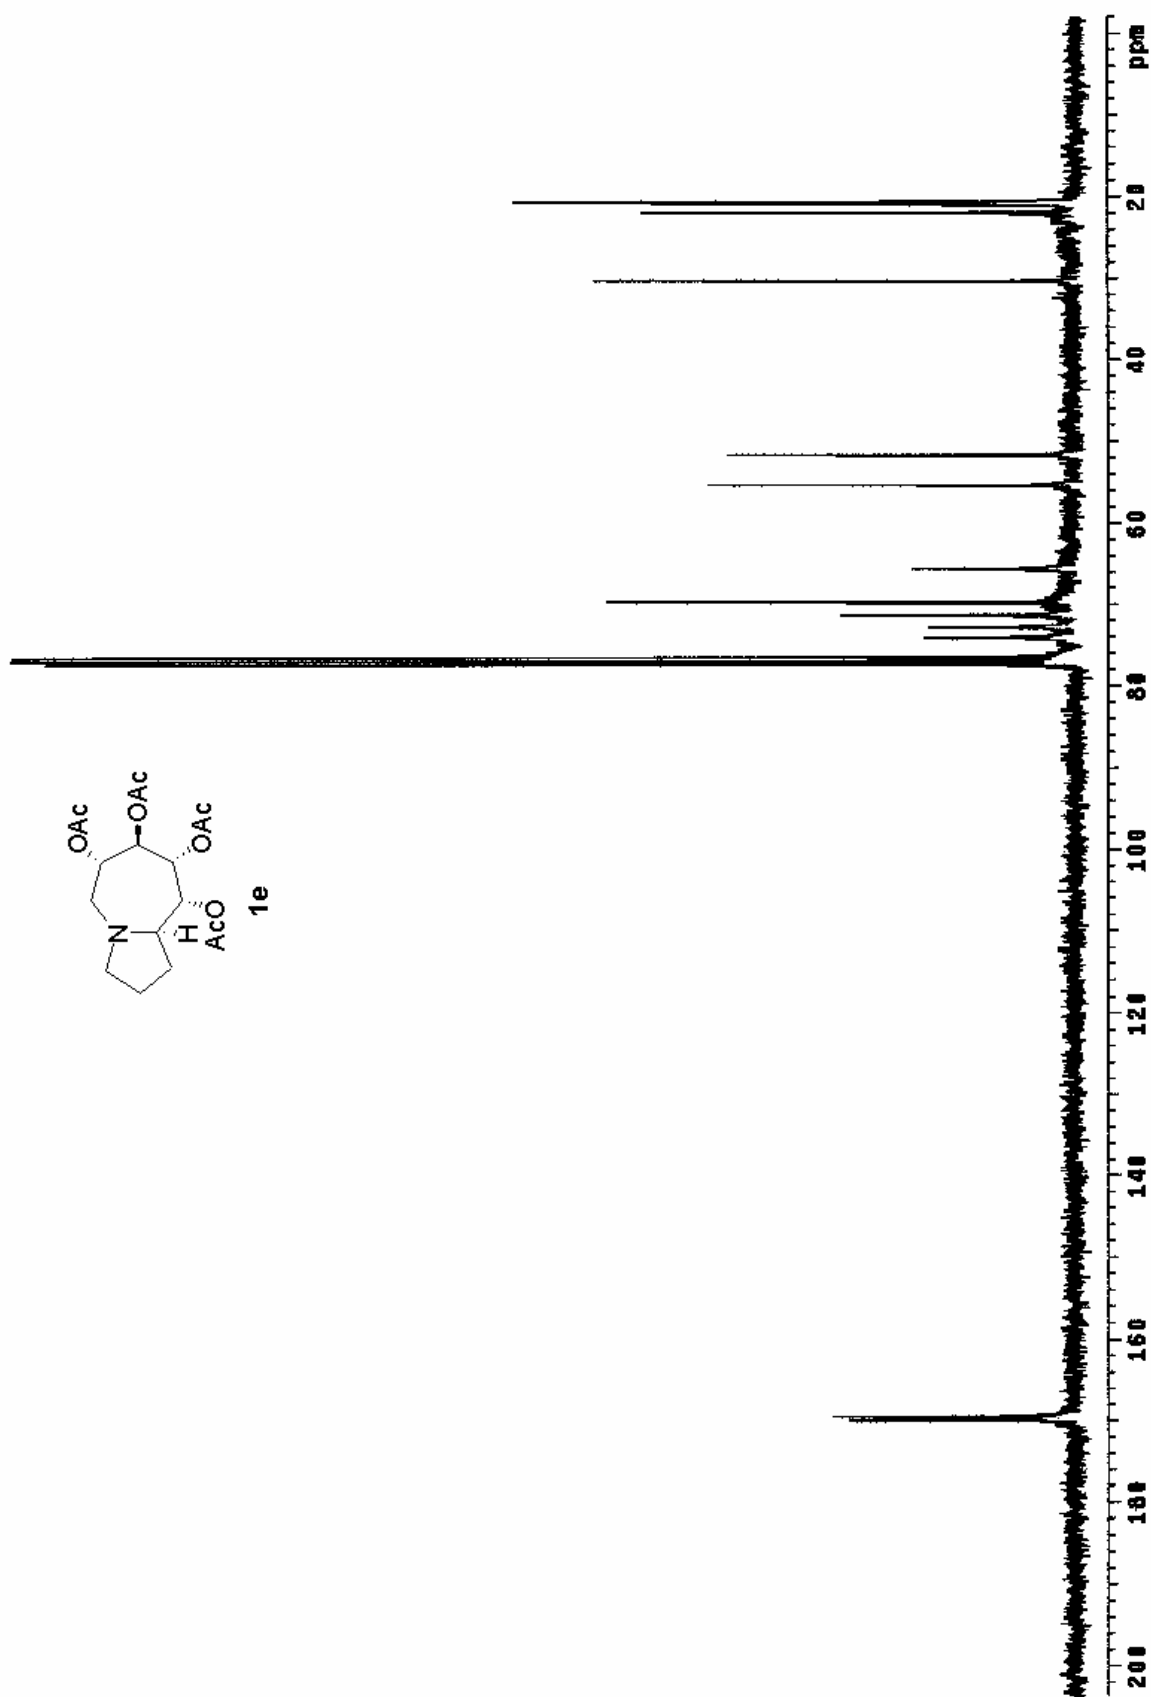

Figure 30: <sup>13</sup>C NMR (75 MHz, CDCl<sub>3</sub>) spectrum of compound 1e



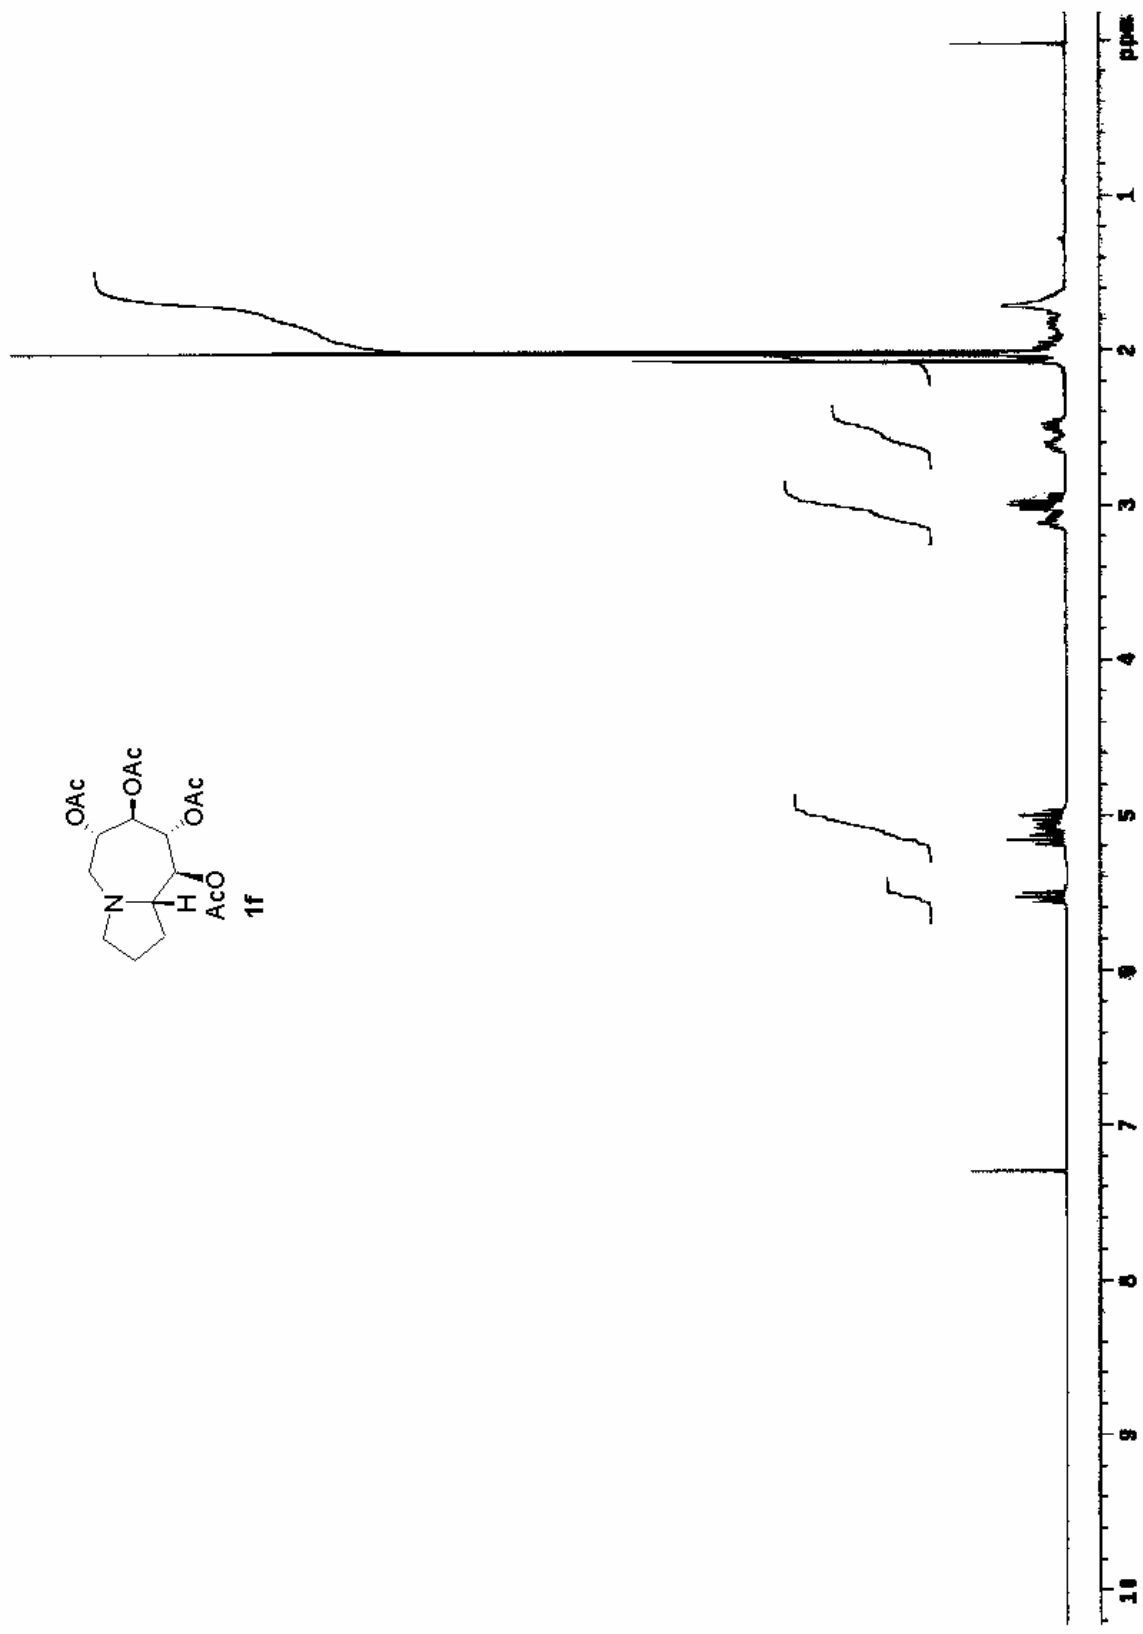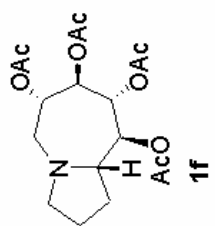

Figure 31: <sup>1</sup>H NMR (300 MHz, CDCl<sub>3</sub>) spectrum of compound 1f

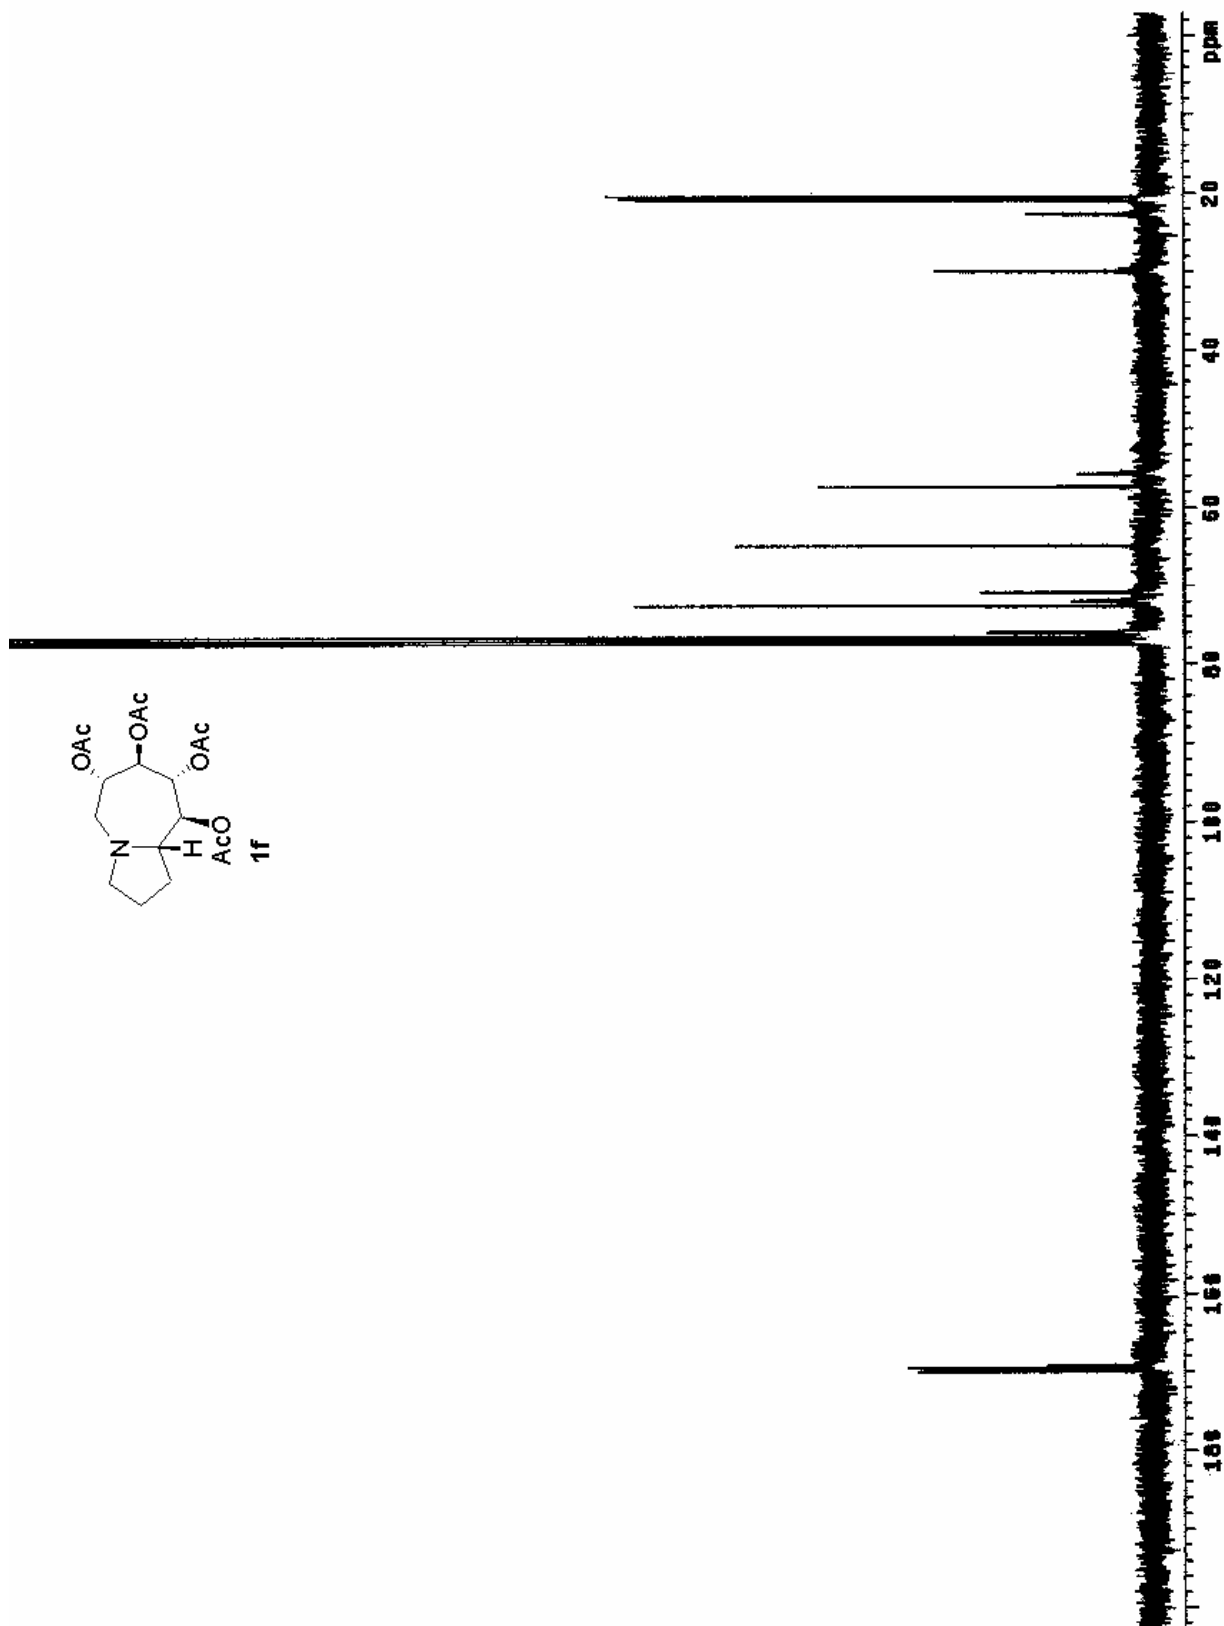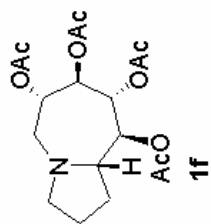

Figure 32: <sup>13</sup>C NMR (75 MHz, CDCl<sub>3</sub>) spectrum of compound 1f

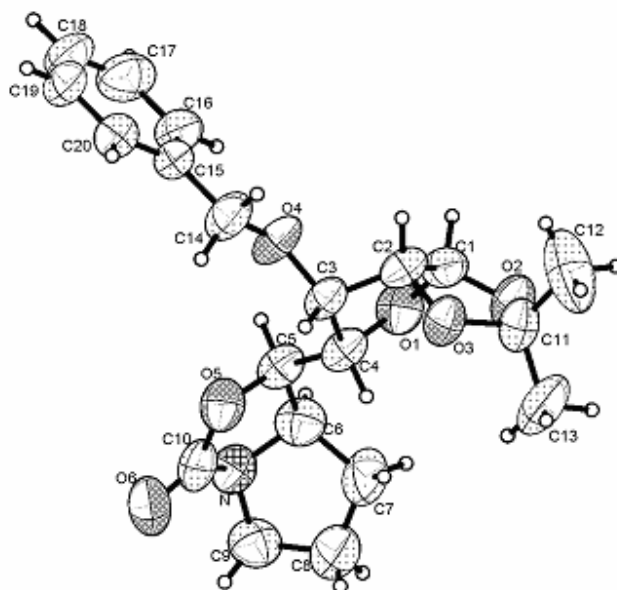

Fig.2 ORTEP drawing of the compound **12a**, the ellipsoids are drawn at 50% probability

Table 1. Crystal data and structure refinement for 3-O-benzyl-(6-N,5-O-carbonyl)-6,7,8,9-tetra-deoxy-1,2-O-isopropylidene- $\alpha$ -D-glycero-D-gluco-nonofuranose **12a**.

|                                 |                                                        |
|---------------------------------|--------------------------------------------------------|
| Empirical formula               | C <sub>20</sub> H <sub>25</sub> N O <sub>6</sub>       |
| Formula weight                  | 375.41                                                 |
| Temperature                     | 293(2) K                                               |
| Wavelength                      | 0.71073 Å                                              |
| Crystal system, space group     | Orthorhombic, P212121                                  |
| Unit cell dimensions            | a = 5.5259(4) Å<br>b = 10.0212(7) Å<br>c = 34.600(2) Å |
| Volume                          | 1916.0(2) Å <sup>3</sup>                               |
| Z, Calculated density           | 4, 1.301 Mg/m <sup>3</sup>                             |
| Absorption coefficient          | 0.096 mm <sup>-1</sup>                                 |
| F(000)                          | 800                                                    |
| Crystal size                    | 0.54 x 0.17 x 0.13 mm                                  |
| Theta range for data collection | 2.12 to 25.00 deg.                                     |
| Limiting indices                | -6 ≤ h ≤ 6, -11 ≤ k ≤ 9, -32 ≤ l ≤ 41                  |
| Reflections collected / unique  | 9697 / 3372 [R(int) = 0.0270]                          |

S33

|                               |                                             |
|-------------------------------|---------------------------------------------|
| Completeness to theta = 25.00 | 100.0 %                                     |
| Max. and min. transmission    | 0.9872 and 0.9499                           |
| Refinement method             | Full-matrix least-squares on F <sup>2</sup> |

Data / restraints / parameters 3372 / 0 / 246  
 Goodness-of-fit on F<sup>2</sup> 1.178  
 Final R indices [ $I > 2\sigma(I)$ ] R1 = 0.0622, wR2 = 0.1473  
 R indices (all data) R1 = 0.0694, wR2 = 0.1516  
 Absolute structure parameter 0.6(19)  
 Largest diff. peak and hole 0.191 and -0.154 e.Å<sup>-3</sup>

Table 2. Atomic coordinates ( $\times 10^4$ ) and equivalent isotropic displacement parameters ( $\text{Å}^2 \times 10^3$ ) for **12a**.  
 U(eq) is defined as one third of the trace of the orthogonalized U<sub>ij</sub> tensor.

|       | x         | y        | z        | U(eq)  |
|-------|-----------|----------|----------|--------|
| O(1)  | 11724(4)  | 6034(2)  | 8413(1)  | 67(1)  |
| O(2)  | 11780(5)  | 3741(2)  | 8484(1)  | 74(1)  |
| O(3)  | 8849(4)   | 4052(2)  | 8930(1)  | 62(1)  |
| O(4)  | 10877(5)  | 7406(2)  | 9146(1)  | 68(1)  |
| O(5)  | 7154(5)   | 8611(2)  | 8511(1)  | 71(1)  |
| O(6)  | 4213(5)   | 9856(3)  | 8251(1)  | 85(1)  |
| N     | 7499(6)   | 9200(3)  | 7892(1)  | 63(1)  |
| C(1)  | 12291(6)  | 4959(4)  | 8656(1)  | 60(1)  |
| C(2)  | 10591(6)  | 5058(4)  | 9004(1)  | 60(1)  |
| C(3)  | 9432(6)   | 6426(3)  | 8967(1)  | 55(1)  |
| C(4)  | 9453(6)   | 6593(3)  | 8530(1)  | 58(1)  |
| C(5)  | 9382(6)   | 8001(3)  | 8381(1)  | 61(1)  |
| C(6)  | 9265(8)   | 8128(4)  | 7940(1)  | 71(1)  |
| C(7)  | 8298(11)  | 7003(4)  | 7692(1)  | 106(2) |
| C(8)  | 6461(10)  | 7595(4)  | 7430(1)  | 99(1)  |
| C(9)  | 6326(8)   | 9039(4)  | 7516(1)  | 76(1)  |
| C(10) | 6098(7)   | 9285(3)  | 8212(1)  | 64(1)  |
| C(11) | 9919(7)   | 3068(3)  | 8687(1)  | 65(1)  |
| C(12) | 11032(13) | 1979(5)  | 8922(2)  | 135(2) |
| C(13) | 8036(9)   | 2610(5)  | 8409(2)  | 119(2) |
| C(14) | 10084(7)  | 7792(4)  | 9505(1)  | 74(1)  |
| C(15) | 11563(6)  | 8922(3)  | 9662(1)  | 58(1)  |
| C(16) | 13603(7)  | 9389(4)  | 9478(1)  | 70(1)  |
| C(17) | 14892(9)  | 10434(4) | 9647(2)  | 92(1)  |
| C(18) | 14122(11) | 11012(4) | 9987(1)  | 91(2)  |
| C(19) | 12141(10) | 10549(4) | 10159(1) | 87(1)  |
| C(20) | 10840(8)  | 9517(4)  | 10002(1) | 74(1)  |

Table 3. Bond lengths [Å] and angles [deg] for 3-O-benzyl-(6-N,5-O-carbonyl)-6,7,8,9-tetraoxy-1,2-O-isopropylidene- $\alpha$ -D-glycero-D-gluco-nonofuranose **12a**.

|            |          |
|------------|----------|
| O(1)-C(1)  | 1.402(4) |
| O(1)-C(4)  | 1.433(4) |
| O(2)-C(1)  | 1.386(4) |
| O(2)-C(11) | 1.416(4) |
| O(3)-C(2)  | 1.417(4) |
| S34        |          |
| O(3)-C(11) | 1.423(4) |
| O(4)-C(14) | 1.372(4) |
| O(4)-C(3)  | 1.410(4) |
| O(5)-C(10) | 1.367(4) |
| O(5)-C(5)  | 1.446(4) |

|              |          |
|--------------|----------|
| O(6)-C(10)   | 1.196(5) |
| N-C(10)      | 1.353(5) |
| N-C(6)       | 1.461(5) |
| N-C(9)       | 1.463(4) |
| C(1)-C(2)    | 1.531(5) |
| C(1)-H(1)    | 0.9800   |
| C(2)-C(3)    | 1.519(5) |
| C(2)-H(2)    | 0.9800   |
| C(3)-C(4)    | 1.519(4) |
| C(3)-H(3)    | 0.9800   |
| C(4)-C(5)    | 1.503(5) |
| C(4)-H(4)    | 0.9800   |
| C(5)-C(6)    | 1.535(5) |
| C(5)-H(5)    | 0.9800   |
| C(6)-C(7)    | 1.514(6) |
| C(6)-H(6)    | 0.9800   |
| C(7)-C(8)    | 1.484(6) |
| C(7)-H(7A)   | 0.9700   |
| C(7)-H(7B)   | 0.9700   |
| C(8)-C(9)    | 1.480(6) |
| C(8)-H(8A)   | 0.9700   |
| C(8)-H(8B)   | 0.9700   |
| C(9)-H(9A)   | 0.9700   |
| C(9)-H(9B)   | 0.9700   |
| C(11)-C(12)  | 1.494(6) |
| C(11)-C(13)  | 1.491(6) |
| C(12)-H(12A) | 0.9600   |
| C(12)-H(12B) | 0.9600   |
| C(12)-H(12C) | 0.9600   |
| C(13)-H(13A) | 0.9600   |
| C(13)-H(13B) | 0.9600   |
| C(13)-H(13C) | 0.9600   |
| C(14)-C(15)  | 1.498(5) |
| C(14)-H(14A) | 0.9700   |
| C(14)-H(14B) | 0.9700   |
| C(15)-C(16)  | 1.376(5) |
| C(15)-C(20)  | 1.378(5) |
| C(16)-C(17)  | 1.395(5) |
| C(16)-H(16)  | 0.9300   |
| C(17)-C(18)  | 1.378(7) |
| C(17)-H(17)  | 0.9300   |
| C(18)-C(19)  | 1.330(7) |
| C(18)-H(18)  | 0.9300   |
| C(19)-C(20)  | 1.371(6) |
| C(19)-H(19)  | 0.9300   |
| C(20)-H(20)  | 0.9300   |

|                 |          |
|-----------------|----------|
| C(1)-O(1)-C(4)  | 109.0(2) |
| C(1)-O(2)-C(11) | 110.8(3) |
| C(2)-O(3)-C(11) | 108.5(2) |
| C(14)-O(4)-C(3) | 114.4(3) |
| C(10)-O(5)-C(5) | 109.7(3) |
| C(10)-N-C(6)    | 109.6(3) |
| C(10)-N-C(9)    | 118.7(3) |
| C(6)-N-C(9)     | 108.4(3) |
| O(2)-C(1)-O(1)  | 112.0(2) |
| O(2)-C(1)-C(2)  | 105.6(3) |
| O(1)-C(1)-C(2)  | 106.6(3) |
| O(2)-C(1)-H(1)  | 110.8    |
| O(1)-C(1)-H(1)  | 110.8    |
| C(2)-C(1)-H(1)  | 110.8    |

S35

|                |          |
|----------------|----------|
| O(3)-C(2)-C(3) | 109.9(3) |
| O(3)-C(2)-C(1) | 103.2(2) |
| C(3)-C(2)-C(1) | 104.5(3) |
| O(3)-C(2)-H(2) | 112.8    |
| C(3)-C(2)-H(2) | 112.8    |
| C(1)-C(2)-H(2) | 112.8    |

|                     |          |
|---------------------|----------|
| O(4)-C(3)-C(2)      | 110.7(3) |
| O(4)-C(3)-C(4)      | 110.8(3) |
| C(2)-C(3)-C(4)      | 100.4(2) |
| O(4)-C(3)-H(3)      | 111.5    |
| C(2)-C(3)-H(3)      | 111.5    |
| C(4)-C(3)-H(3)      | 111.5    |
| O(1)-C(4)-C(5)      | 107.0(3) |
| O(1)-C(4)-C(3)      | 104.2(3) |
| C(5)-C(4)-C(3)      | 116.4(3) |
| O(1)-C(4)-H(4)      | 109.6    |
| C(5)-C(4)-H(4)      | 109.6    |
| C(3)-C(4)-H(4)      | 109.6    |
| O(5)-C(5)-C(4)      | 108.2(3) |
| O(5)-C(5)-C(6)      | 103.8(3) |
| C(4)-C(5)-C(6)      | 114.9(3) |
| O(5)-C(5)-H(5)      | 109.9    |
| C(4)-C(5)-H(5)      | 109.9    |
| C(6)-C(5)-H(5)      | 109.9    |
| N-C(6)-C(7)         | 104.3(3) |
| N-C(6)-C(5)         | 101.6(3) |
| C(7)-C(6)-C(5)      | 121.1(3) |
| N-C(6)-H(6)         | 109.6    |
| C(7)-C(6)-H(6)      | 109.6    |
| C(5)-C(6)-H(6)      | 109.6    |
| C(8)-C(7)-C(6)      | 106.8(4) |
| C(8)-C(7)-H(7A)     | 110.4    |
| C(6)-C(7)-H(7A)     | 110.4    |
| C(8)-C(7)-H(7B)     | 110.4    |
| C(6)-C(7)-H(7B)     | 110.4    |
| H(7A)-C(7)-H(7B)    | 108.6    |
| C(9)-C(8)-C(7)      | 107.6(4) |
| C(9)-C(8)-H(8A)     | 110.2    |
| C(7)-C(8)-H(8A)     | 110.2    |
| C(9)-C(8)-H(8B)     | 110.2    |
| C(7)-C(8)-H(8B)     | 110.2    |
| H(8A)-C(8)-H(8B)    | 108.5    |
| N-C(9)-C(8)         | 105.3(3) |
| N-C(9)-H(9A)        | 110.7    |
| C(8)-C(9)-H(9A)     | 110.7    |
| N-C(9)-H(9B)        | 110.7    |
| C(8)-C(9)-H(9B)     | 110.7    |
| H(9A)-C(9)-H(9B)    | 108.8    |
| O(6)-C(10)-N        | 128.4(4) |
| O(6)-C(10)-O(5)     | 121.4(3) |
| N-C(10)-O(5)        | 110.1(3) |
| O(2)-C(11)-O(3)     | 105.3(3) |
| O(2)-C(11)-C(12)    | 108.6(4) |
| O(3)-C(11)-C(12)    | 110.9(3) |
| O(2)-C(11)-C(13)    | 109.4(3) |
| O(3)-C(11)-C(13)    | 107.7(3) |
| C(12)-C(11)-C(13)   | 114.5(4) |
| C(11)-C(12)-H(12A)  | 109.5    |
| C(11)-C(12)-H(12B)  | 109.5    |
| H(12A)-C(12)-H(12B) | 109.5    |
| C(11)-C(12)-H(12C)  | 109.5    |
| H(12A)-C(12)-H(12C) | 109.5    |
| H(12B)-C(12)-H(12C) | 109.5    |
| C(11)-C(13)-H(13A)  | 109.5    |
| C(11)-C(13)-H(13B)  | 109.5    |
| H(13A)-C(13)-H(13B) | 109.5    |

S36

|                     |          |
|---------------------|----------|
| C(11)-C(13)-H(13C)  | 109.5    |
| H(13A)-C(13)-H(13C) | 109.5    |
| H(13B)-C(13)-H(13C) | 109.5    |
| O(4)-C(14)-C(15)    | 111.5(3) |
| O(4)-C(14)-H(14A)   | 109.3    |
| C(15)-C(14)-H(14A)  | 109.3    |
| O(4)-C(14)-H(14B)   | 109.3    |

|                     |          |
|---------------------|----------|
| C(15)-C(14)-H(14B)  | 109.3    |
| H(14A)-C(14)-H(14B) | 108.0    |
| C(16)-C(15)-C(20)   | 119.0(3) |
| C(16)-C(15)-C(14)   | 122.5(3) |
| C(20)-C(15)-C(14)   | 118.6(3) |
| C(15)-C(16)-C(17)   | 118.7(4) |
| C(15)-C(16)-H(16)   | 120.7    |
| C(17)-C(16)-H(16)   | 120.7    |
| C(18)-C(17)-C(16)   | 121.0(5) |
| C(18)-C(17)-H(17)   | 119.5    |
| C(16)-C(17)-H(17)   | 119.5    |
| C(19)-C(18)-C(17)   | 119.3(4) |
| C(19)-C(18)-H(18)   | 120.3    |
| C(17)-C(18)-H(18)   | 120.3    |
| C(18)-C(19)-C(20)   | 121.1(4) |
| C(18)-C(19)-H(19)   | 119.4    |
| C(20)-C(19)-H(19)   | 119.4    |
| C(19)-C(20)-C(15)   | 120.9(4) |
| C(19)-C(20)-H(20)   | 119.6    |
| C(15)-C(20)-H(20)   | 119.6    |

Table 4. Anisotropic displacement parameters ( $\text{\AA}^2 \times 10^3$ ) for 3-O-benzyl-(6-N,5-O-carbonyl)-6,7,8,9-tetra-deoxy-1,2-O-isopropylidene- $\alpha$ -D-glycero-D-gluco-nonofuranose **12a**.

The anisotropic displacement factor exponent takes the form:  
 $-2 \pi^2 [ h^2 a^{*2} U_{11} + \dots + 2 h k a^* b^* U_{12} ]$

|       | U11    | U22    | U33    | U23    | U13    | U12    |
|-------|--------|--------|--------|--------|--------|--------|
| O(1)  | 75(2)  | 73(2)  | 54(1)  | -2(1)  | 14(1)  | 0(1)   |
| O(2)  | 78(2)  | 71(2)  | 72(2)  | -20(1) | 20(1)  | -8(1)  |
| O(3)  | 67(1)  | 58(1)  | 62(1)  | -12(1) | 13(1)  | -6(1)  |
| O(4)  | 75(2)  | 78(2)  | 52(1)  | -24(1) | 8(1)   | -27(1) |
| O(5)  | 83(2)  | 68(1)  | 61(1)  | -9(1)  | 12(1)  | 3(1)   |
| O(6)  | 81(2)  | 61(2)  | 113(2) | -10(2) | 15(2)  | 9(2)   |
| N     | 70(2)  | 55(2)  | 63(2)  | 3(1)   | 5(2)   | -11(2) |
| C(1)  | 51(2)  | 71(2)  | 57(2)  | -8(2)  | -4(2)  | -4(2)  |
| C(2)  | 70(2)  | 70(2)  | 40(2)  | -10(2) | -8(2)  | -10(2) |
| C(3)  | 57(2)  | 60(2)  | 49(2)  | -16(2) | 2(2)   | -8(2)  |
| C(4)  | 63(2)  | 65(2)  | 47(2)  | -10(2) | 1(2)   | -12(2) |
| C(5)  | 60(2)  | 66(2)  | 57(2)  | -9(2)  | 1(2)   | -15(2) |
| C(6)  | 74(2)  | 84(3)  | 55(2)  | 1(2)   | 5(2)   | 0(2)   |
| C(7)  | 175(5) | 83(3)  | 61(2)  | -19(2) | -31(3) | 35(3)  |
| C(8)  | 122(4) | 85(3)  | 91(3)  | -16(2) | -19(3) | 8(3)   |
| C(9)  | 86(3)  | 77(2)  | 65(2)  | 15(2)  | -6(2)  | 0(2)   |
| C(10) | 76(3)  | 38(2)  | 76(2)  | -7(2)  | 6(2)   | -12(2) |
| C(11) | 73(2)  | 54(2)  | 67(2)  | -11(2) | 18(2)  | -4(2)  |
| C(12) | 197(6) | 96(3)  | 112(4) | 30(3)  | 52(4)  | 62(4)  |
| C(13) | 91(3)  | 120(4) | 146(4) | -81(4) | 3(3)   | -22(3) |
| C(14) | 71(2)  | 83(2)  | 69(2)  | -31(2) | 3(2)   | -9(2)  |
| C(15) | 63(2)  | 53(2)  | 59(2)  | -11(2) | -16(2) | 6(2)   |
| C(16) | 70(2)  | 67(2)  | 72(2)  | -5(2)  | -15(2) | -5(2)  |
| C(17) | 91(3)  | 81(3)  | 105(3) | 13(3)  | -24(3) | -26(3) |
| C(18) | 123(4) | 54(2)  | 96(3)  | -7(2)  | -55(3) | -13(3) |
| C(19) | 121(4) | 64(3)  | 76(3)  | -20(2) | -43(3) | 15(3)  |
| C(20) | 76(2)  | 75(2)  | 70(2)  | -19(2) | -13(2) | 9(2)   |

S37

Table 5. Hydrogen coordinates ( $\times 10^4$ ) and isotropic displacement parameters ( $\text{\AA}^2 \times 10^3$ ) for 3-O-benzyl-(6-N,5-O-carbonyl)-6,7,8,9-tetra-deoxy-1,2-O-isopropylidene- $\alpha$ -D-glycero-D-gluco-nonofuranose **12a**.

|        | x     | y     | z     | U(eq) |
|--------|-------|-------|-------|-------|
| H(1)   | 13987 | 5000  | 8738  | 72    |
| H(2)   | 11429 | 4933  | 9251  | 72    |
| H(3)   | 7779  | 6430  | 9069  | 66    |
| H(4)   | 8124  | 6079  | 8416  | 70    |
| H(5)   | 10771 | 8503  | 8481  | 73    |
| H(6)   | 10841 | 8418  | 7840  | 85    |
| H(7A)  | 9597  | 6602  | 7543  | 127   |
| H(7B)  | 7569  | 6320  | 7852  | 127   |
| H(8A)  | 6923  | 7455  | 7163  | 119   |
| H(8B)  | 4898  | 7179  | 7472  | 119   |
| H(9A)  | 7166  | 9551  | 7319  | 91    |
| H(9B)  | 4655  | 9333  | 7527  | 91    |
| H(12A) | 11977 | 2362  | 9127  | 202   |
| H(12B) | 12055 | 1443  | 8760  | 202   |
| H(12C) | 9778  | 1431  | 9031  | 202   |
| H(13A) | 6755  | 2173  | 8547  | 179   |
| H(13B) | 8745  | 1997  | 8228  | 179   |
| H(13C) | 7396  | 3365  | 8272  | 179   |
| H(14A) | 10181 | 7039  | 9681  | 89    |
| H(14B) | 8403  | 8064  | 9488  | 89    |
| H(16)  | 14111 | 9015  | 9246  | 84    |
| H(17)  | 16294 | 10745 | 9528  | 111   |
| H(18)  | 14979 | 11719 | 10095 | 109   |
| H(19)  | 11629 | 10930 | 10390 | 105   |
| H(20)  | 9452  | 9216  | 10126 | 88    |

Table 6. Torsion angles [deg] for 3-O-benzyl-(6-N,5-O-carbonyl)-6,7,8,9-tetra-deoxy-1,2-O-isopropylidene- $\alpha$ -D-glycero-D-glucopyranose **12a**.

|                      |           |
|----------------------|-----------|
| C(11)-O(2)-C(1)-O(1) | -115.1(3) |
| C(11)-O(2)-C(1)-C(2) | 0.4(4)    |
| C(4)-O(1)-C(1)-O(2)  | 100.9(3)  |
| C(4)-O(1)-C(1)-C(2)  | -14.1(3)  |
| C(11)-O(3)-C(2)-C(3) | 136.1(3)  |
| C(11)-O(3)-C(2)-C(1) | 25.1(3)   |
| O(2)-C(1)-C(2)-O(3)  | -15.5(3)  |
| O(1)-C(1)-C(2)-O(3)  | 103.7(3)  |
| O(2)-C(1)-C(2)-C(3)  | -130.5(3) |
| O(1)-C(1)-C(2)-C(3)  | -11.3(3)  |
| C(14)-O(4)-C(3)-C(2) | -101.3(4) |
| C(14)-O(4)-C(3)-C(4) | 148.3(3)  |
| O(3)-C(2)-C(3)-O(4)  | 162.7(2)  |
| C(1)-C(2)-C(3)-O(4)  | -87.1(3)  |
| O(3)-C(2)-C(3)-C(4)  | -80.2(3)  |
| C(1)-C(2)-C(3)-C(4)  | 30.0(3)   |
| C(1)-O(1)-C(4)-C(5)  | 157.9(2)  |
| C(1)-O(1)-C(4)-C(3)  | 34.1(3)   |
| O(4)-C(3)-C(4)-O(1)  | 78.1(3)   |
| C(2)-C(3)-C(4)-O(1)  | -38.8(3)  |
| O(4)-C(3)-C(4)-C(5)  | -39.4(4)  |
| C(2)-C(3)-C(4)-C(5)  | -156.4(3) |
| C(10)-O(5)-C(5)-C(4) | -134.7(3) |
| C(10)-O(5)-C(5)-C(6) | -12.2(3)  |
| O(1)-C(4)-C(5)-O(5)  | -177.4(2) |
| C(3)-C(4)-C(5)-O(5)  | -61.4(4)  |
| S38                  |           |
| O(1)-C(4)-C(5)-C(6)  | 67.2(4)   |
| C(3)-C(4)-C(5)-C(6)  | -176.8(3) |
| C(10)-N-C(6)-C(7)    | 104.2(4)  |
| C(9)-N-C(6)-C(7)     | -26.8(4)  |
| C(10)-N-C(6)-C(5)    | -22.4(4)  |
| C(9)-N-C(6)-C(5)     | -153.5(3) |



|                         |           |
|-------------------------|-----------|
| O(5)-C(5)-C(6)-N        | 20.2(3)   |
| C(4)-C(5)-C(6)-N        | 138.1(3)  |
| O(5)-C(5)-C(6)-C(7)     | -94.6(4)  |
| C(4)-C(5)-C(6)-C(7)     | 23.3(6)   |
| N-C(6)-C(7)-C(8)        | 16.0(5)   |
| C(5)-C(6)-C(7)-C(8)     | 129.4(4)  |
| C(6)-C(7)-C(8)-C(9)     | 0.2(6)    |
| C(10)-N-C(9)-C(8)       | -98.6(4)  |
| C(6)-N-C(9)-C(8)        | 27.3(4)   |
| C(7)-C(8)-C(9)-N        | -16.4(5)  |
| C(6)-N-C(10)-O(6)       | -164.8(3) |
| C(9)-N-C(10)-O(6)       | -39.5(5)  |
| C(6)-N-C(10)-O(5)       | 16.1(4)   |
| C(9)-N-C(10)-O(5)       | 141.4(3)  |
| C(5)-O(5)-C(10)-O(6)    | 179.1(3)  |
| C(5)-O(5)-C(10)-N       | -1.7(4)   |
| C(1)-O(2)-C(11)-O(3)    | 14.9(4)   |
| C(1)-O(2)-C(11)-C(12)   | -103.9(4) |
| C(1)-O(2)-C(11)-C(13)   | 130.5(3)  |
| C(2)-O(3)-C(11)-O(2)    | -25.5(4)  |
| C(2)-O(3)-C(11)-C(12)   | 91.9(4)   |
| C(2)-O(3)-C(11)-C(13)   | -142.2(3) |
| C(3)-O(4)-C(14)-C(15)   | -174.6(3) |
| O(4)-C(14)-C(15)-C(16)  | -6.4(5)   |
| O(4)-C(14)-C(15)-C(20)  | 173.3(3)  |
| C(20)-C(15)-C(16)-C(17) | 1.2(5)    |
| C(14)-C(15)-C(16)-C(17) | -179.1(4) |
| C(15)-C(16)-C(17)-C(18) | -1.4(6)   |
| C(16)-C(17)-C(18)-C(19) | 1.2(7)    |
| C(17)-C(18)-C(19)-C(20) | -0.8(6)   |
| C(18)-C(19)-C(20)-C(15) | 0.6(6)    |
| C(16)-C(15)-C(20)-C(19) | -0.8(5)   |
| C(14)-C(15)-C(20)-C(19) | 179.5(3)  |

---
